# Supplementary material for: 4D-Flow Cardiovascular Magnetic Resonance Sequence for Aortic Assessment: Multi-Vendor and Multi-Magnetic Field Reproducibility in Healthy Volunteers
Source: MDPI journal article supplement (doi:10.3390/jcm12082960), 2023-04-19

**Phi1.5T**

## AxialWSS

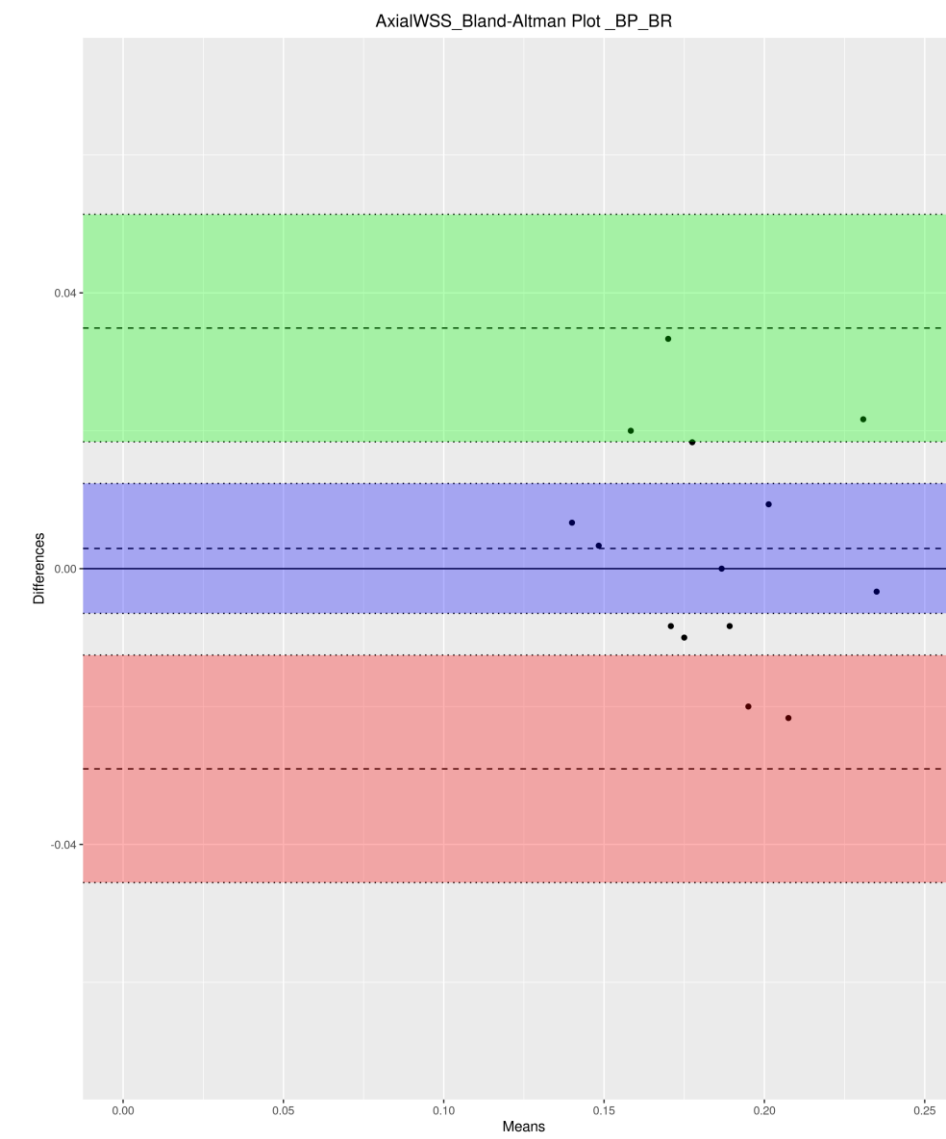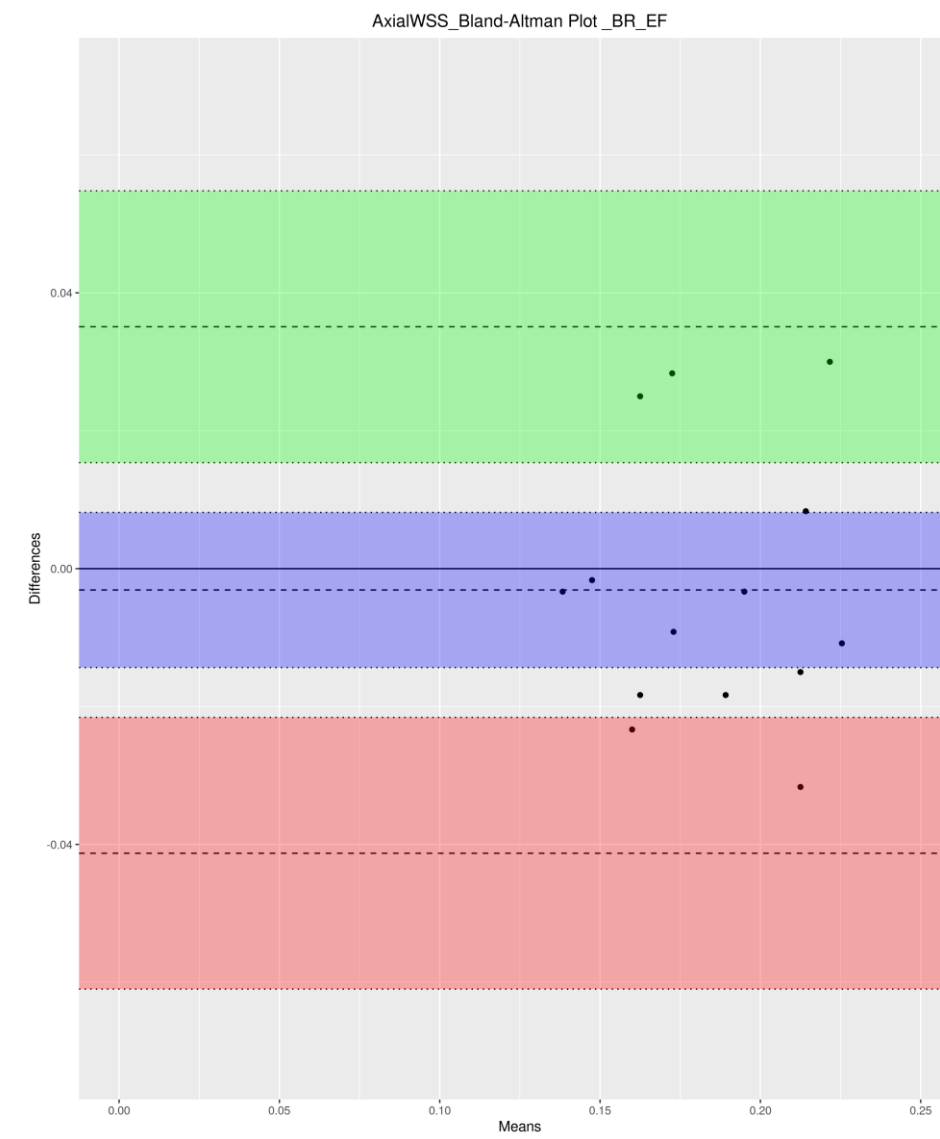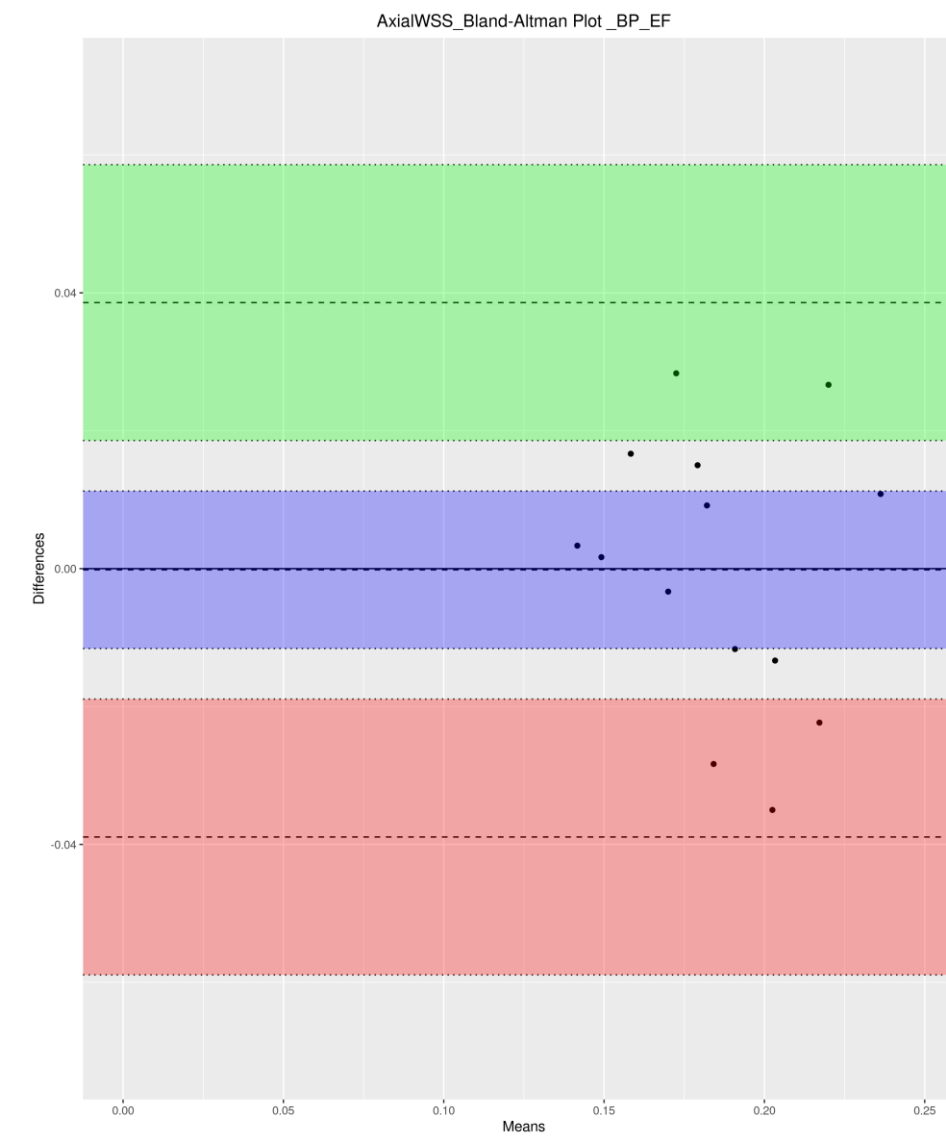

# Phi3T

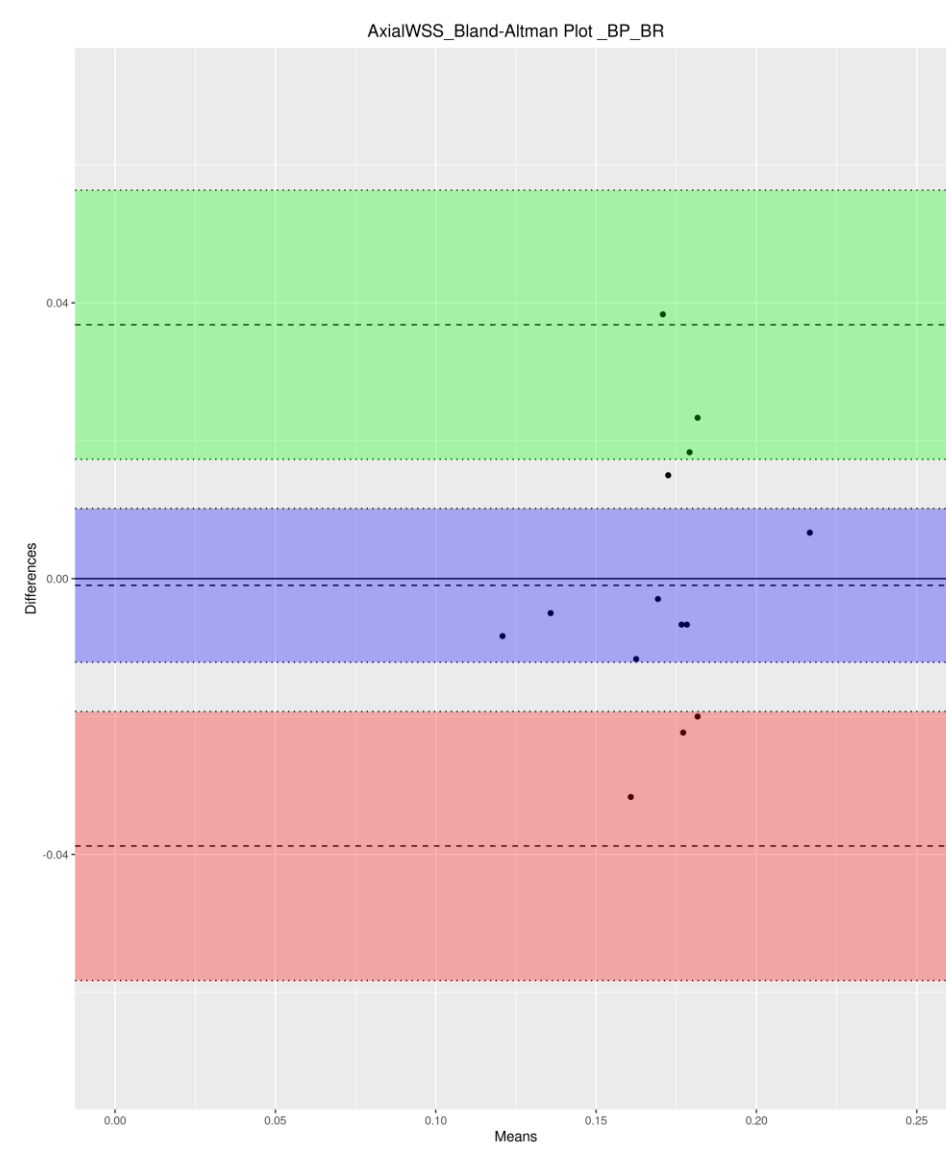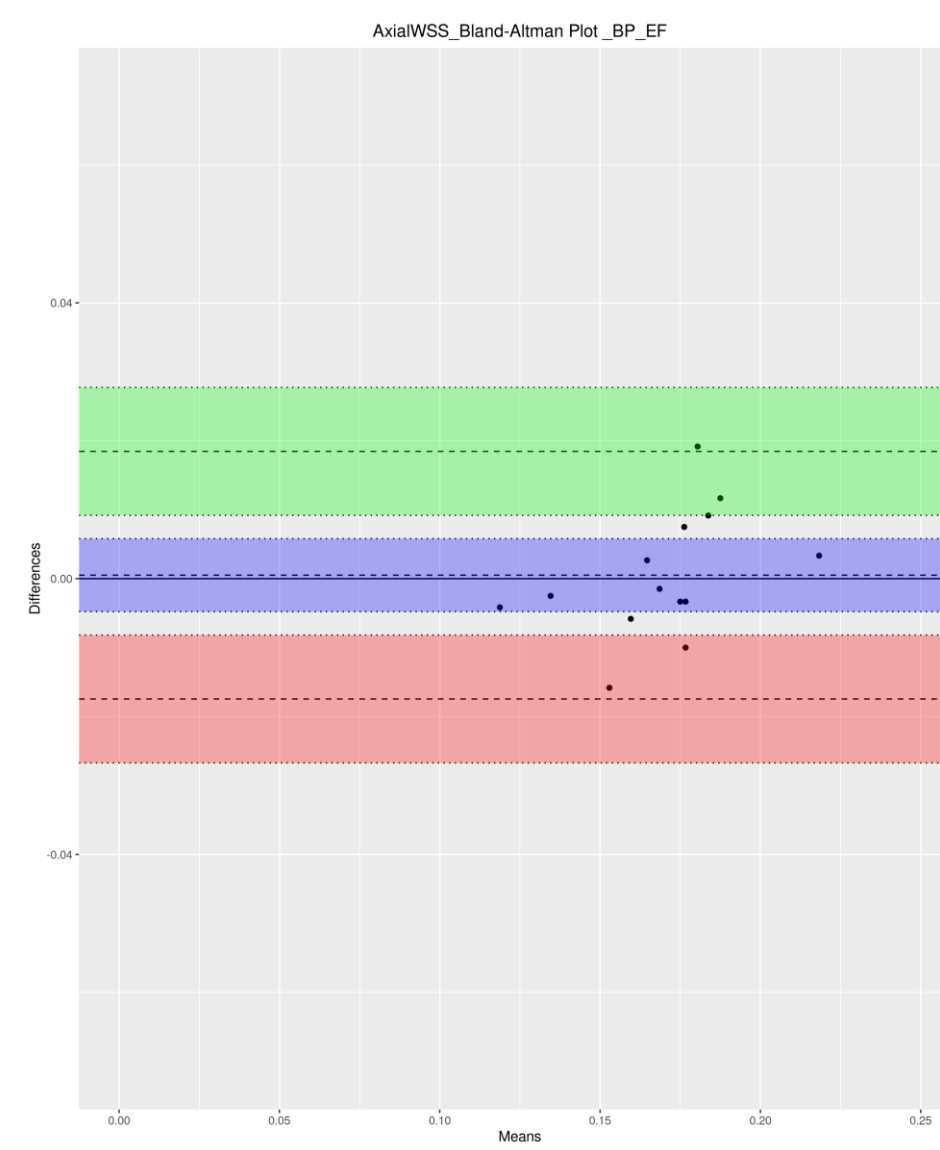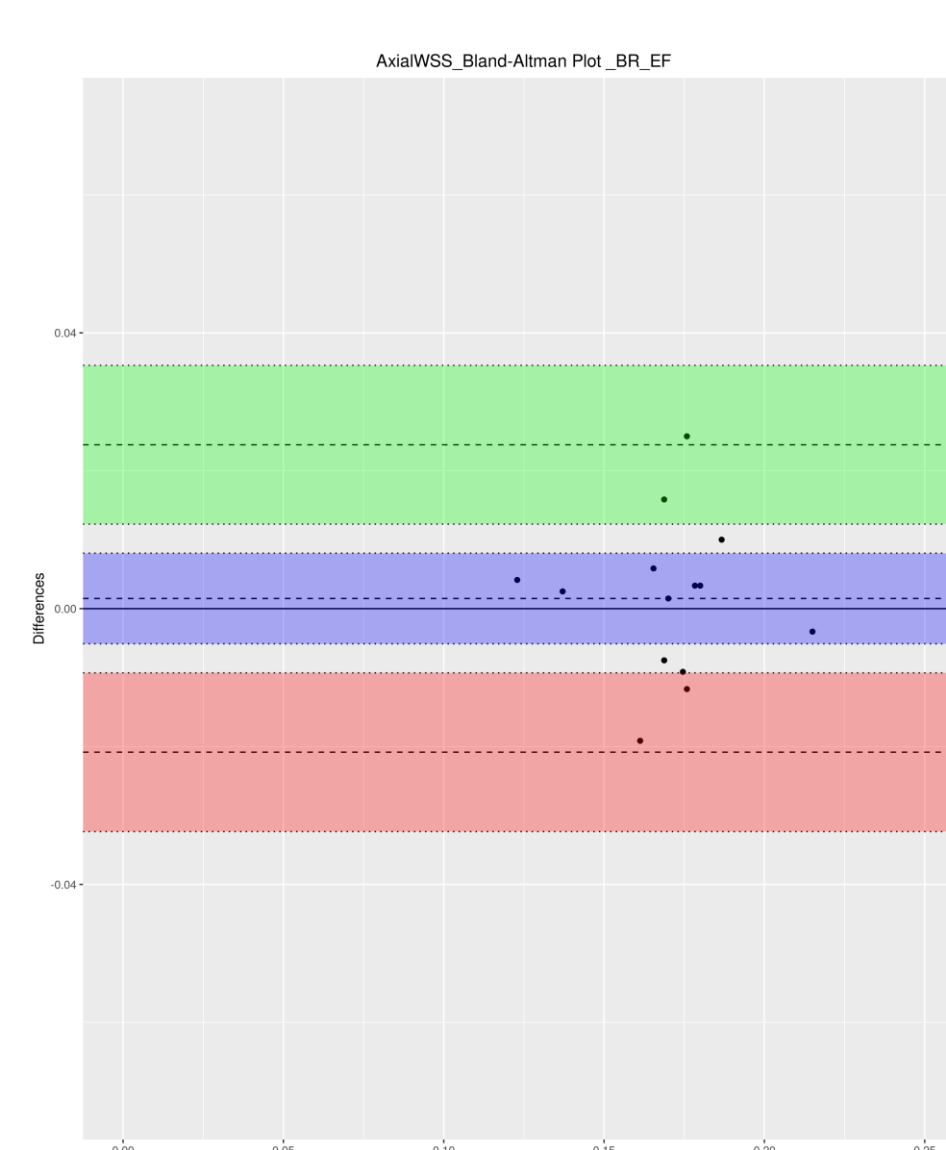

## Siem3T

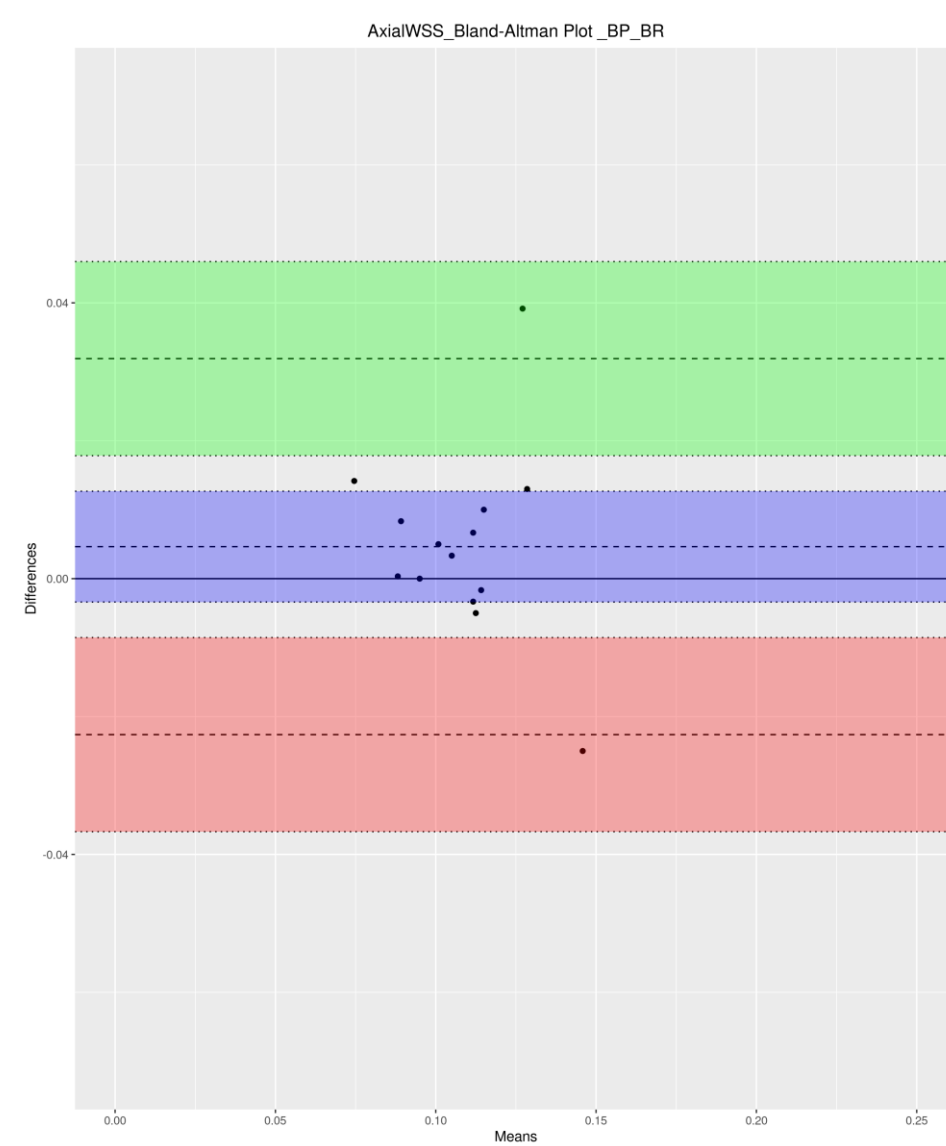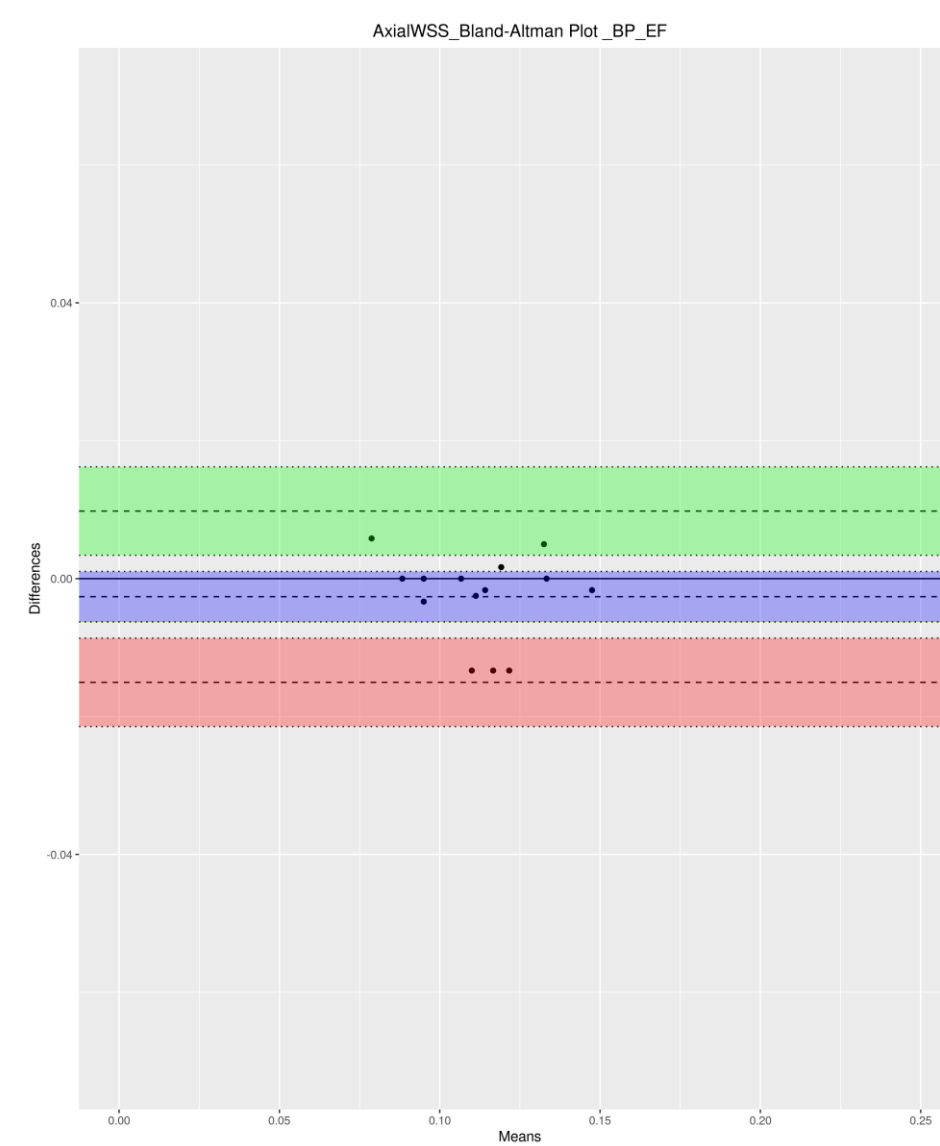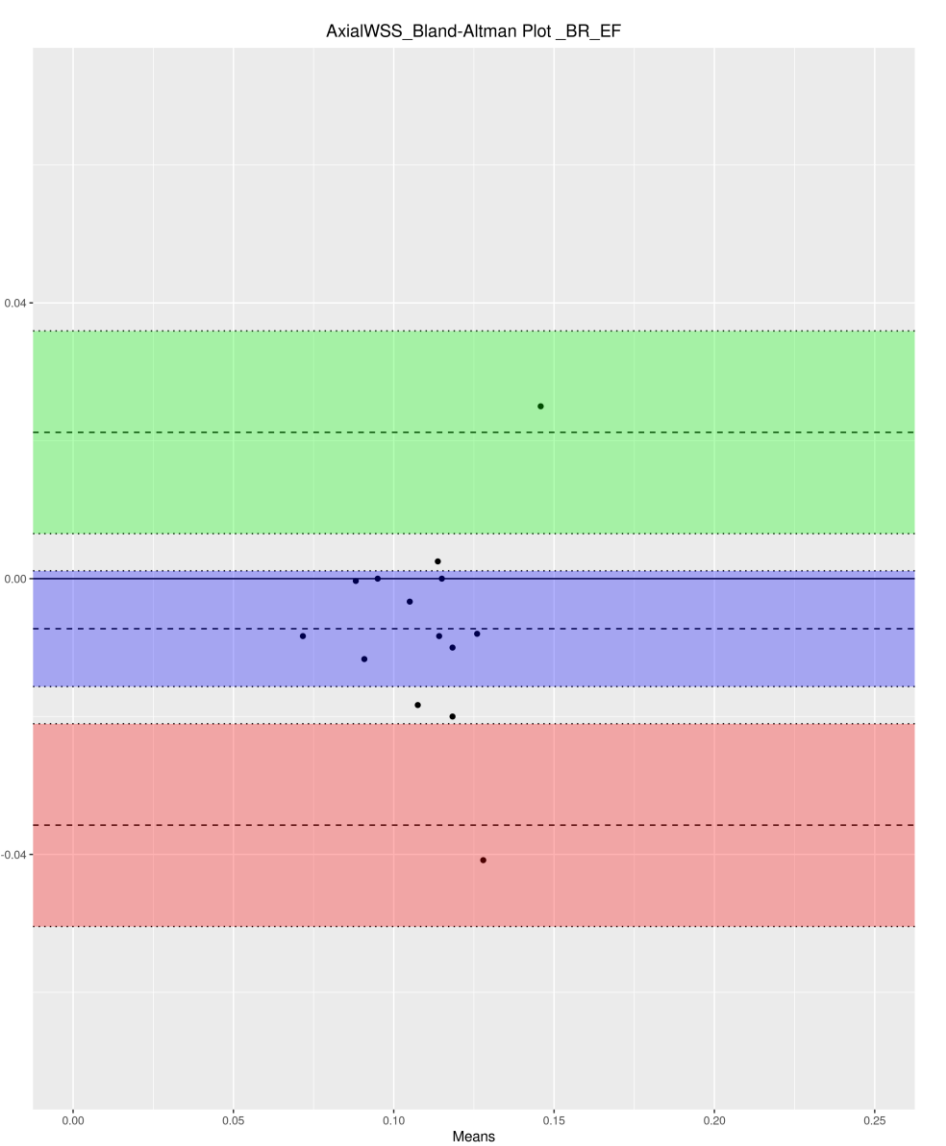

# CircWSS

## Phi1.5T

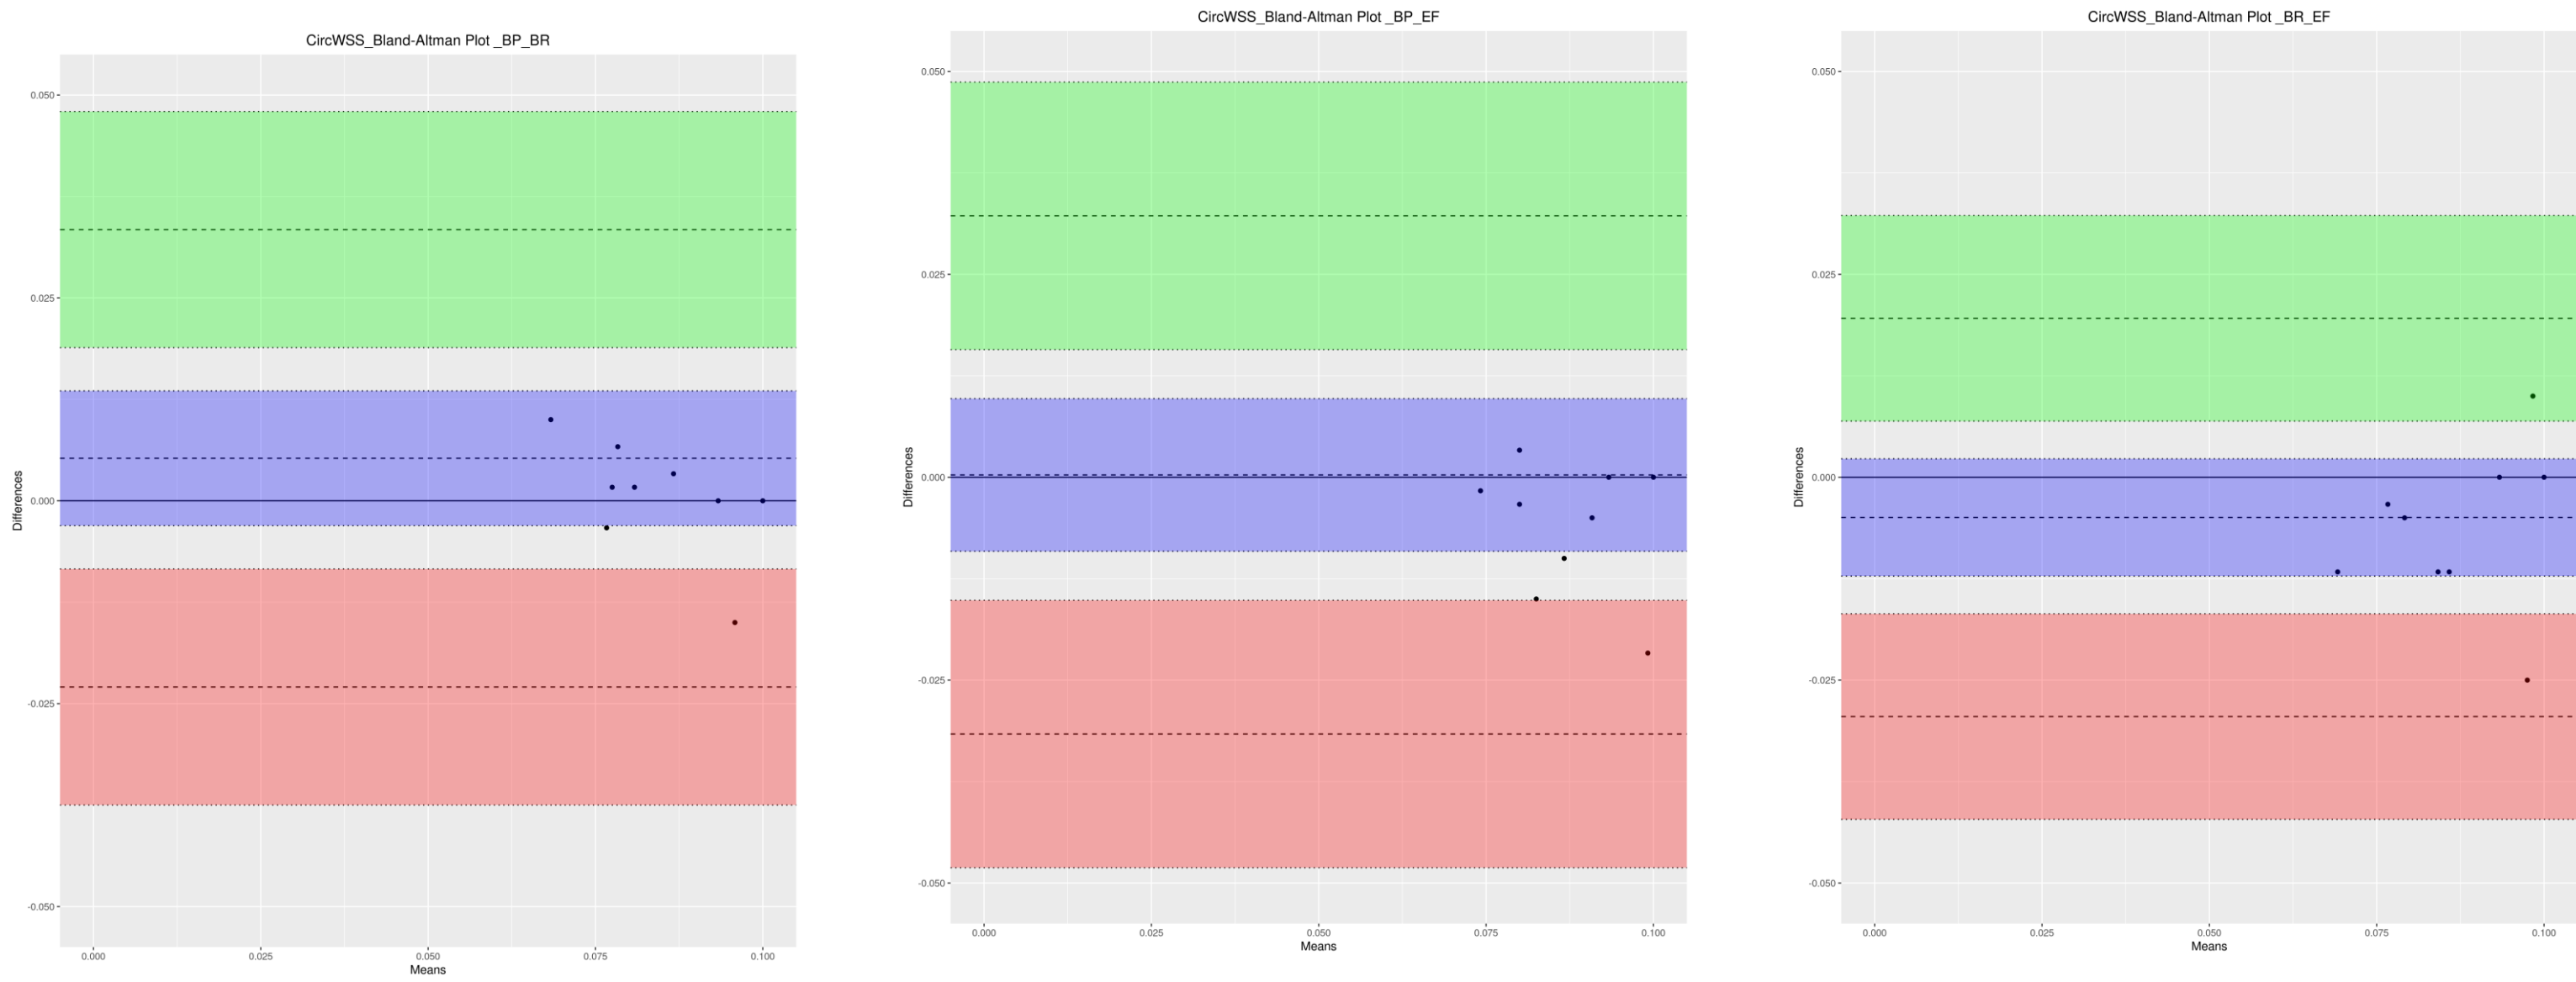

## Phi3T

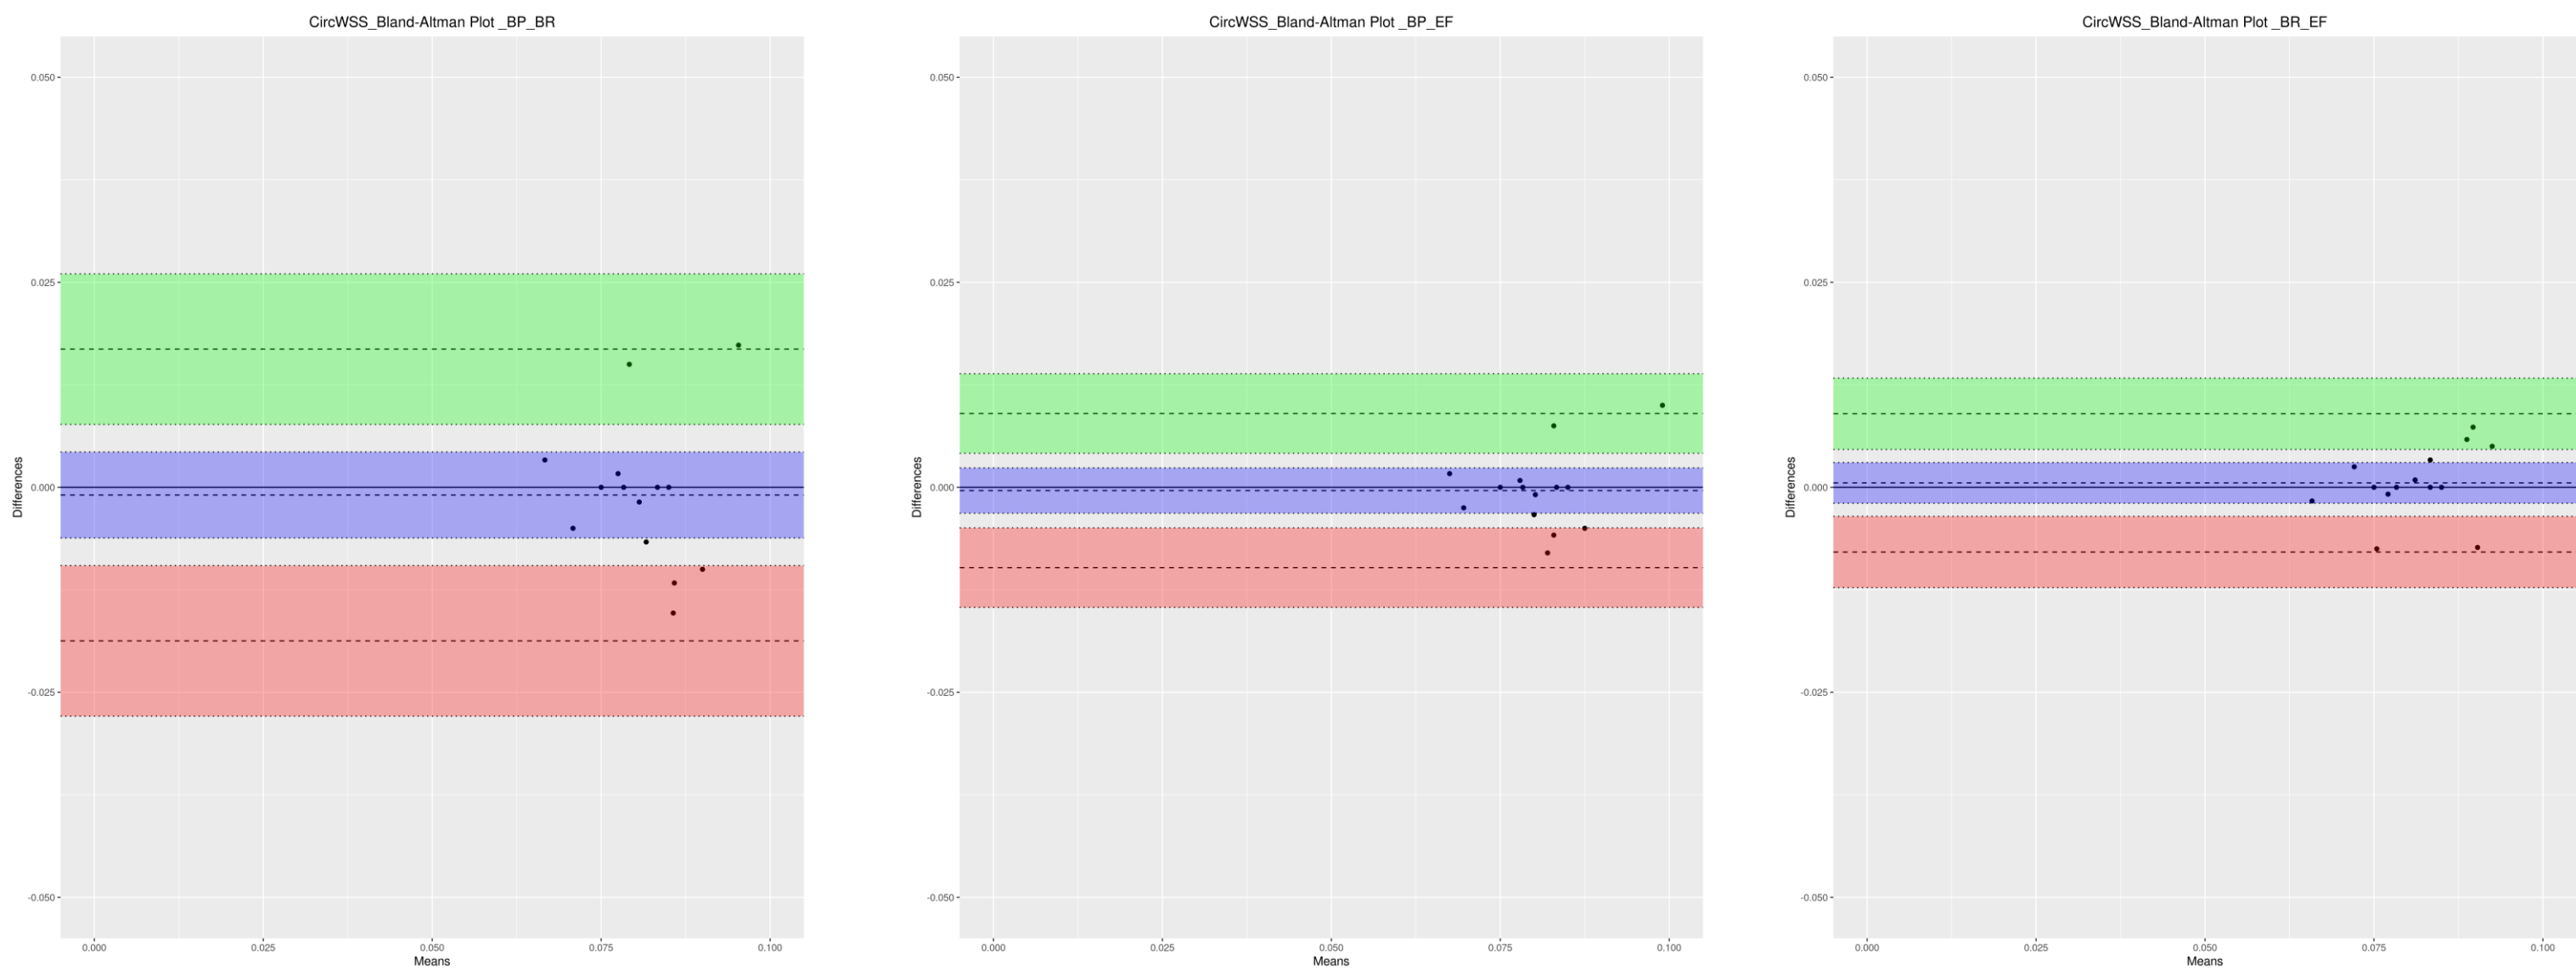

## Siem3T

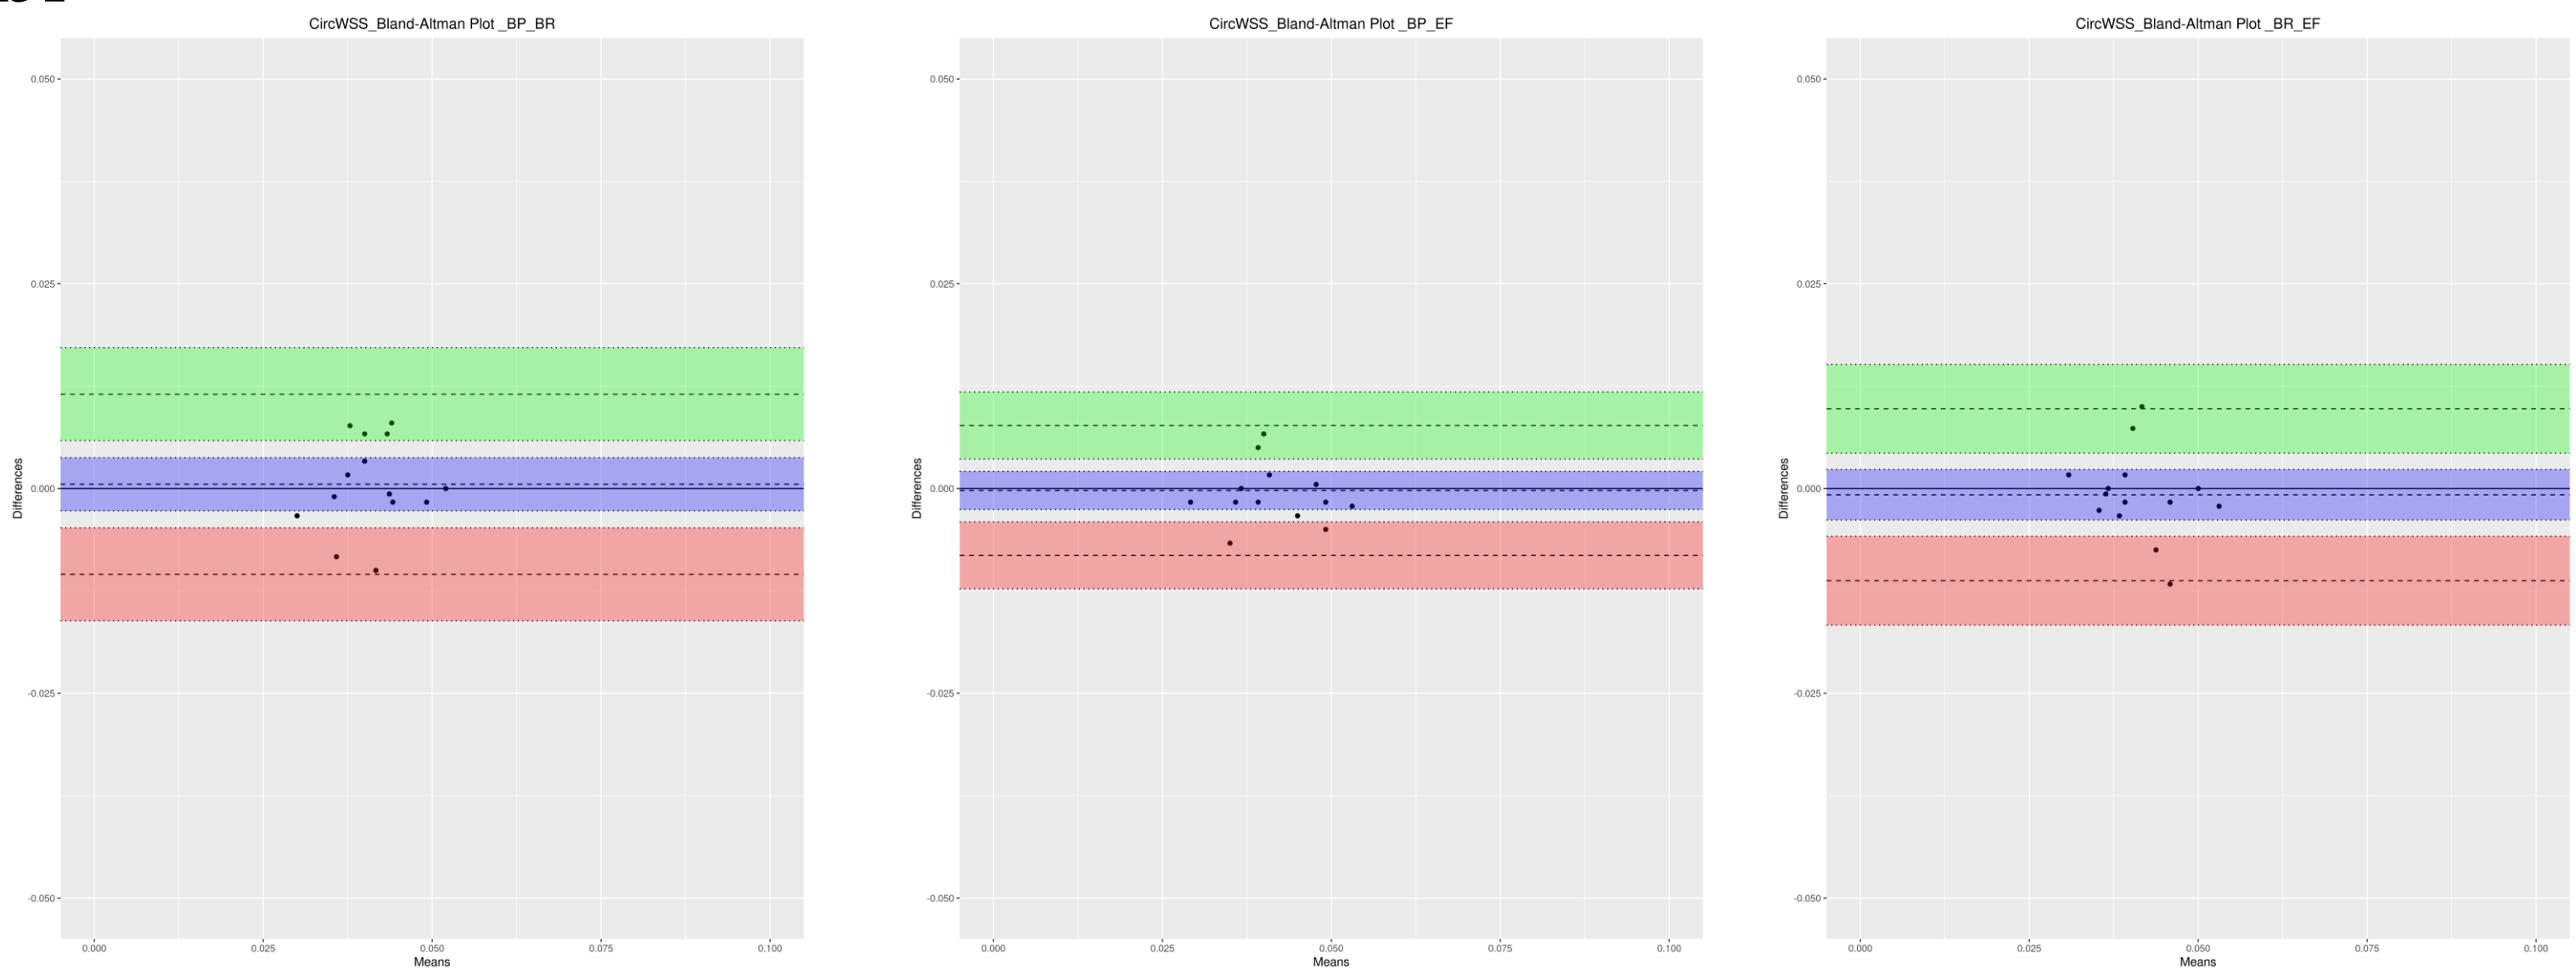

Phi1.5T

Flow

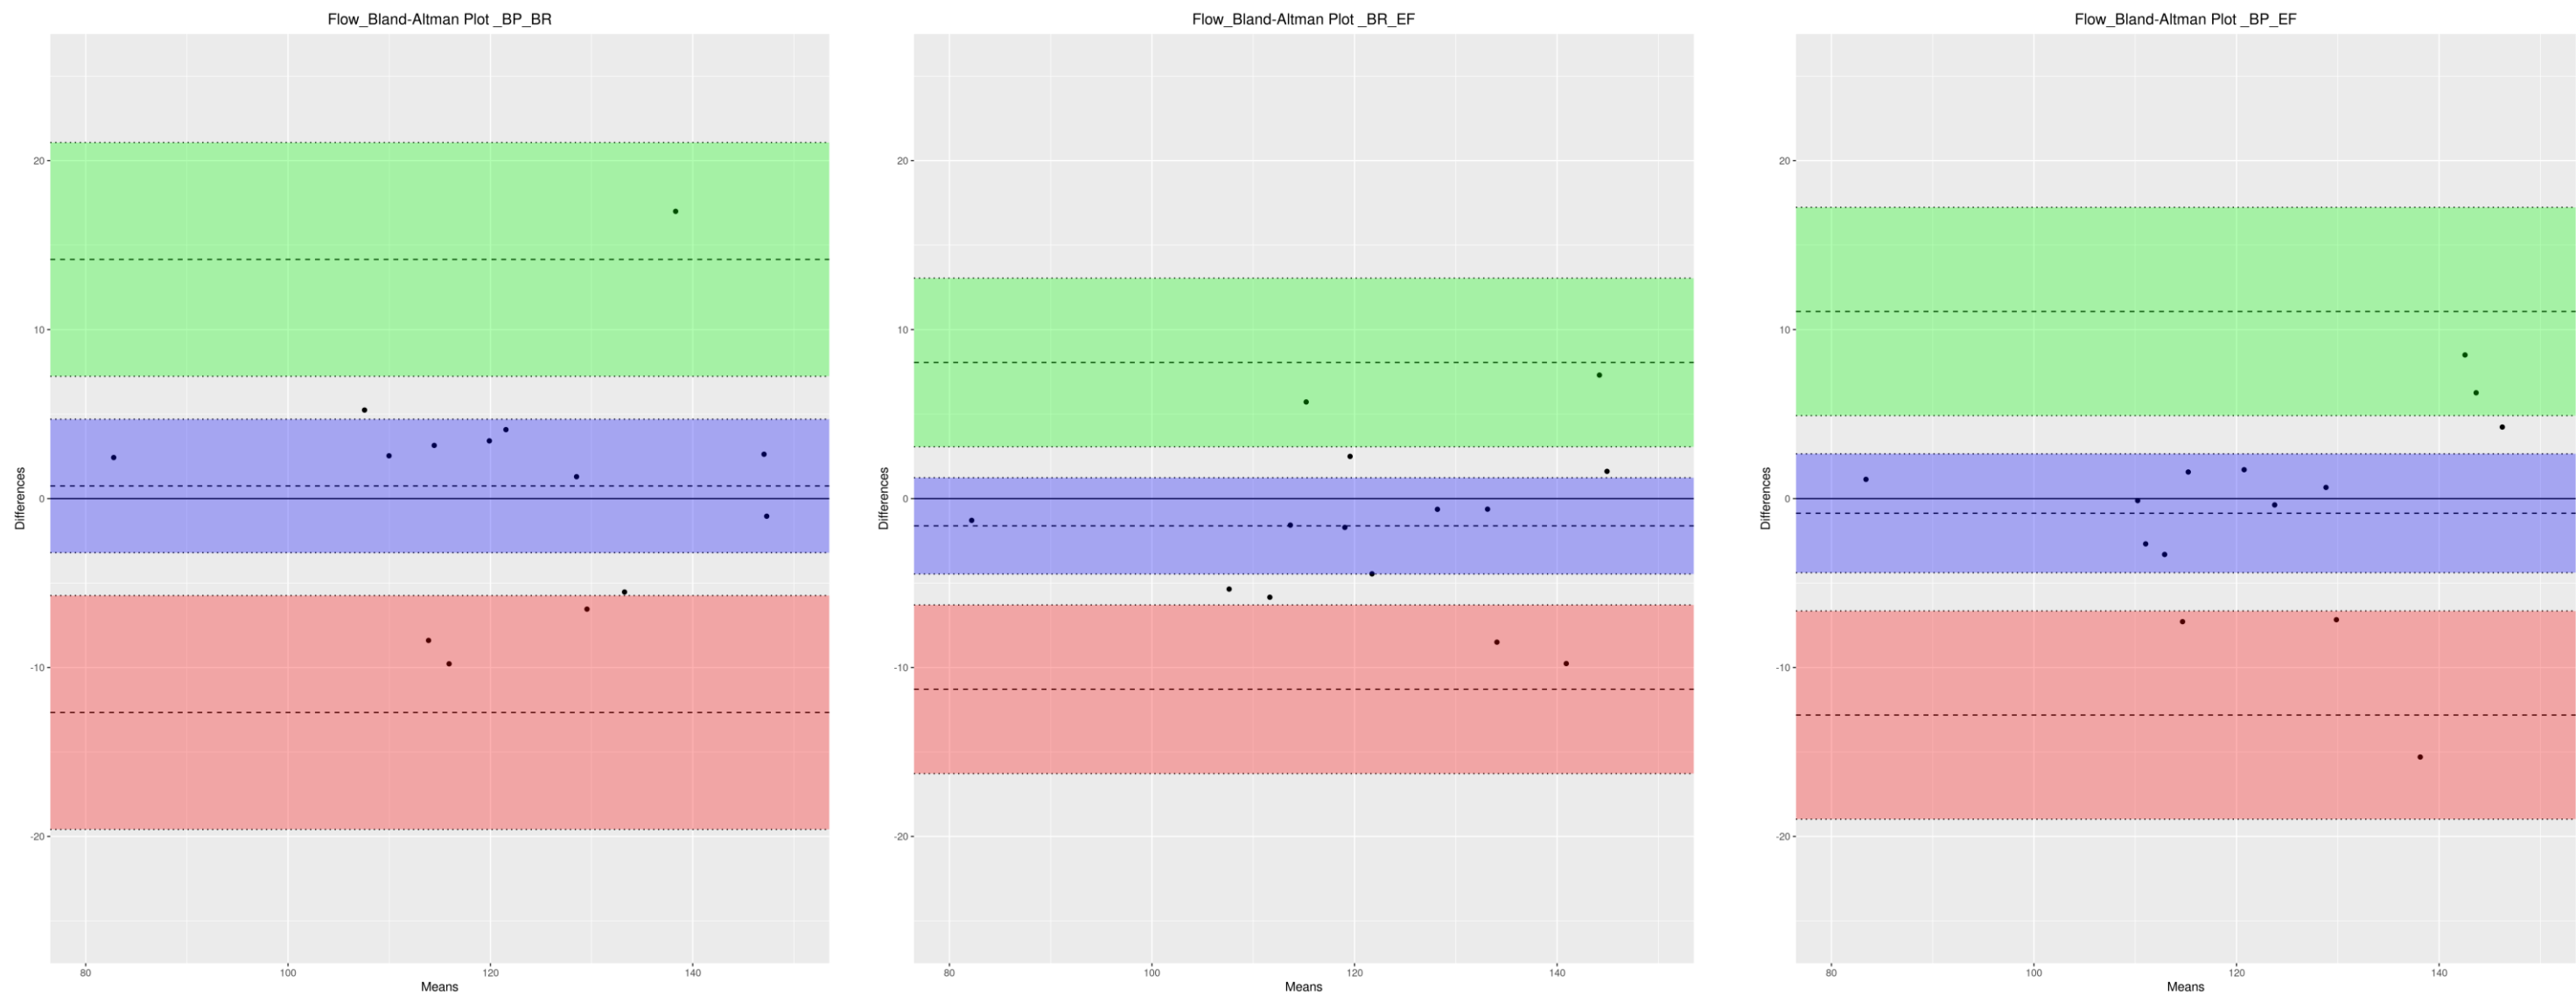

Phi3T

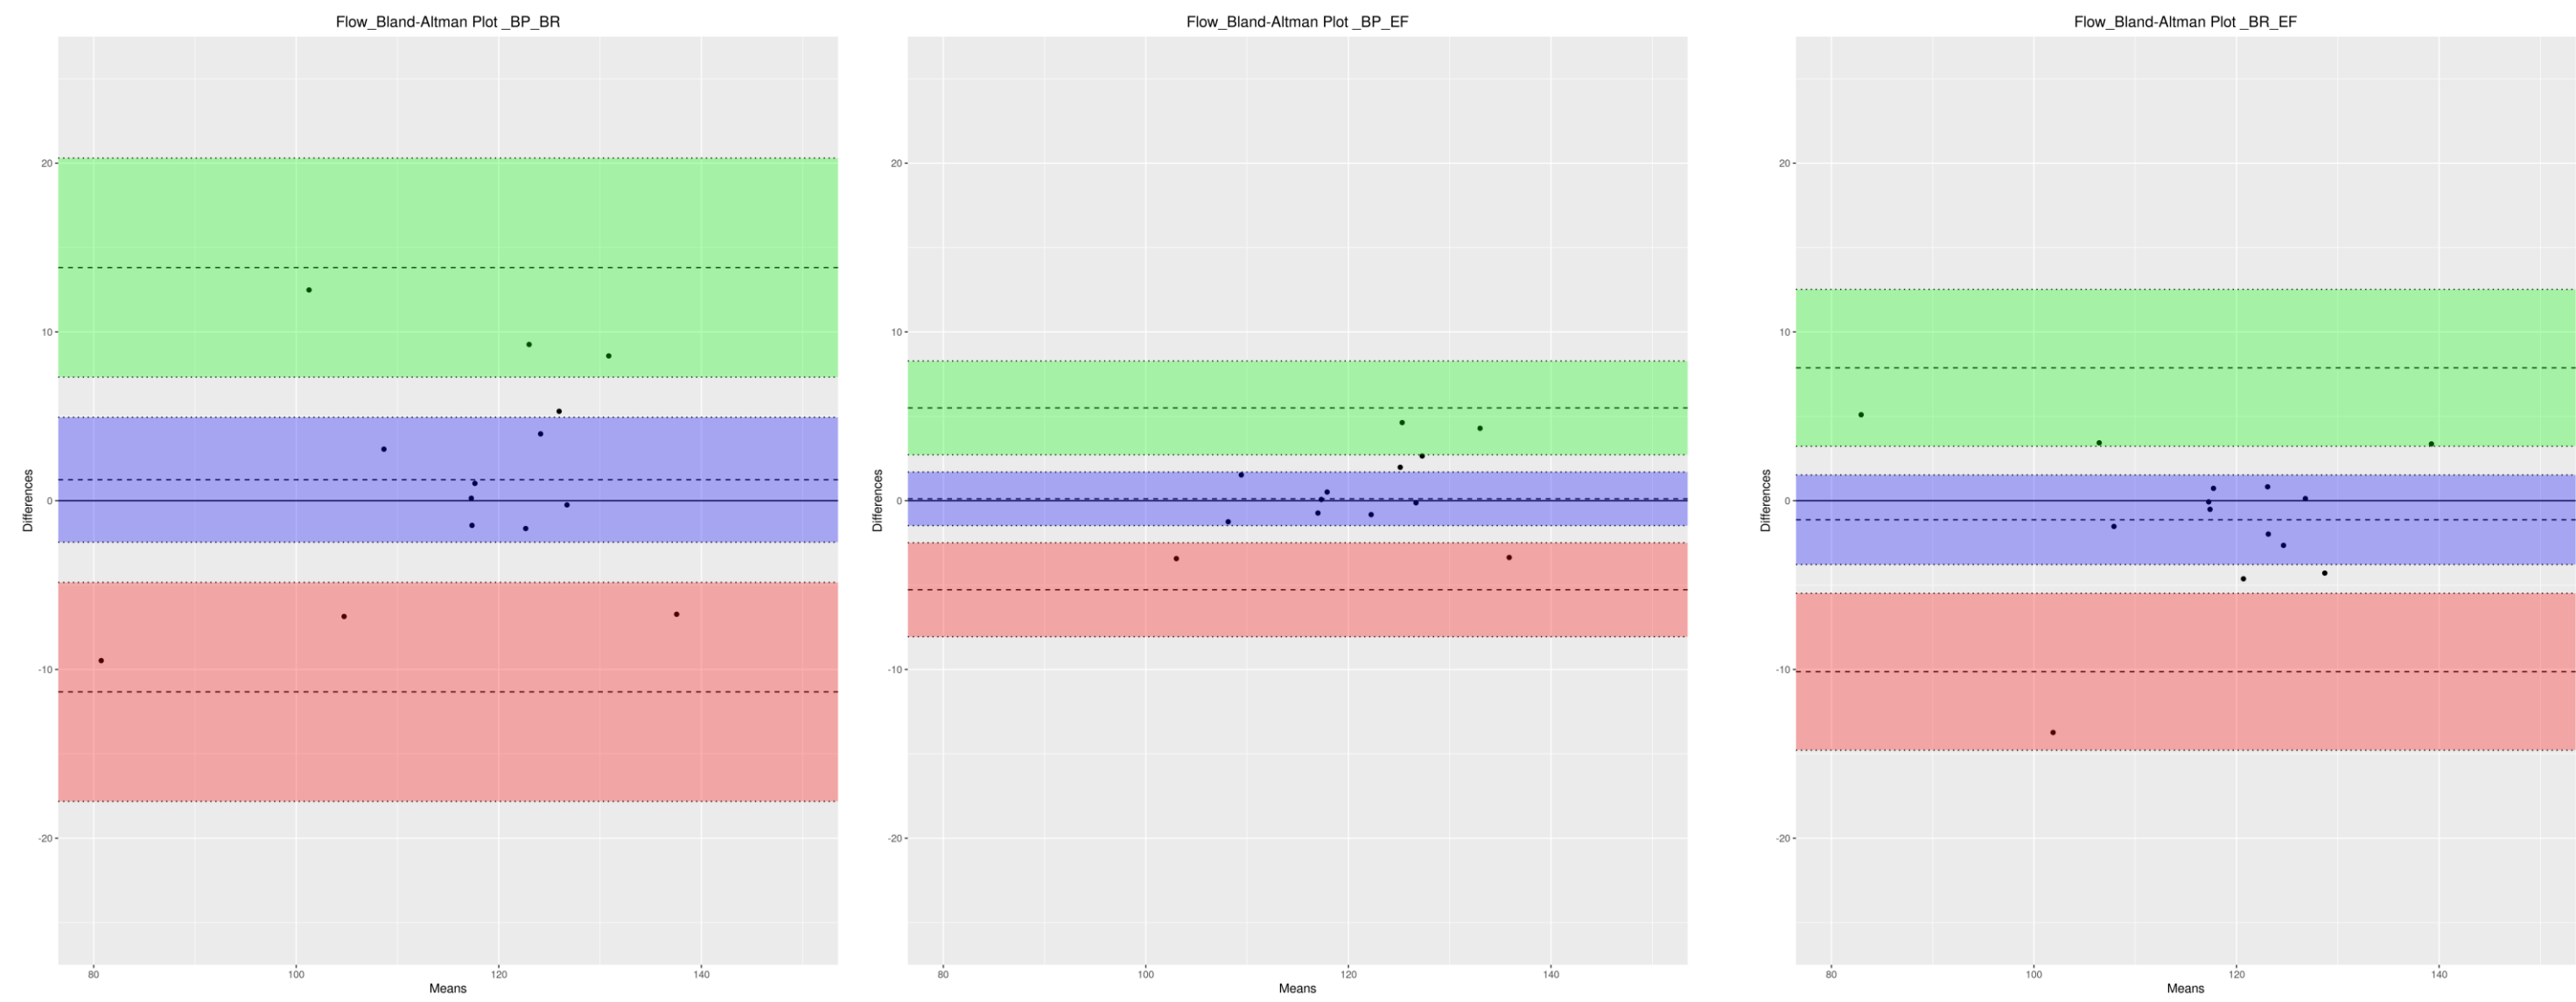

Siem3T

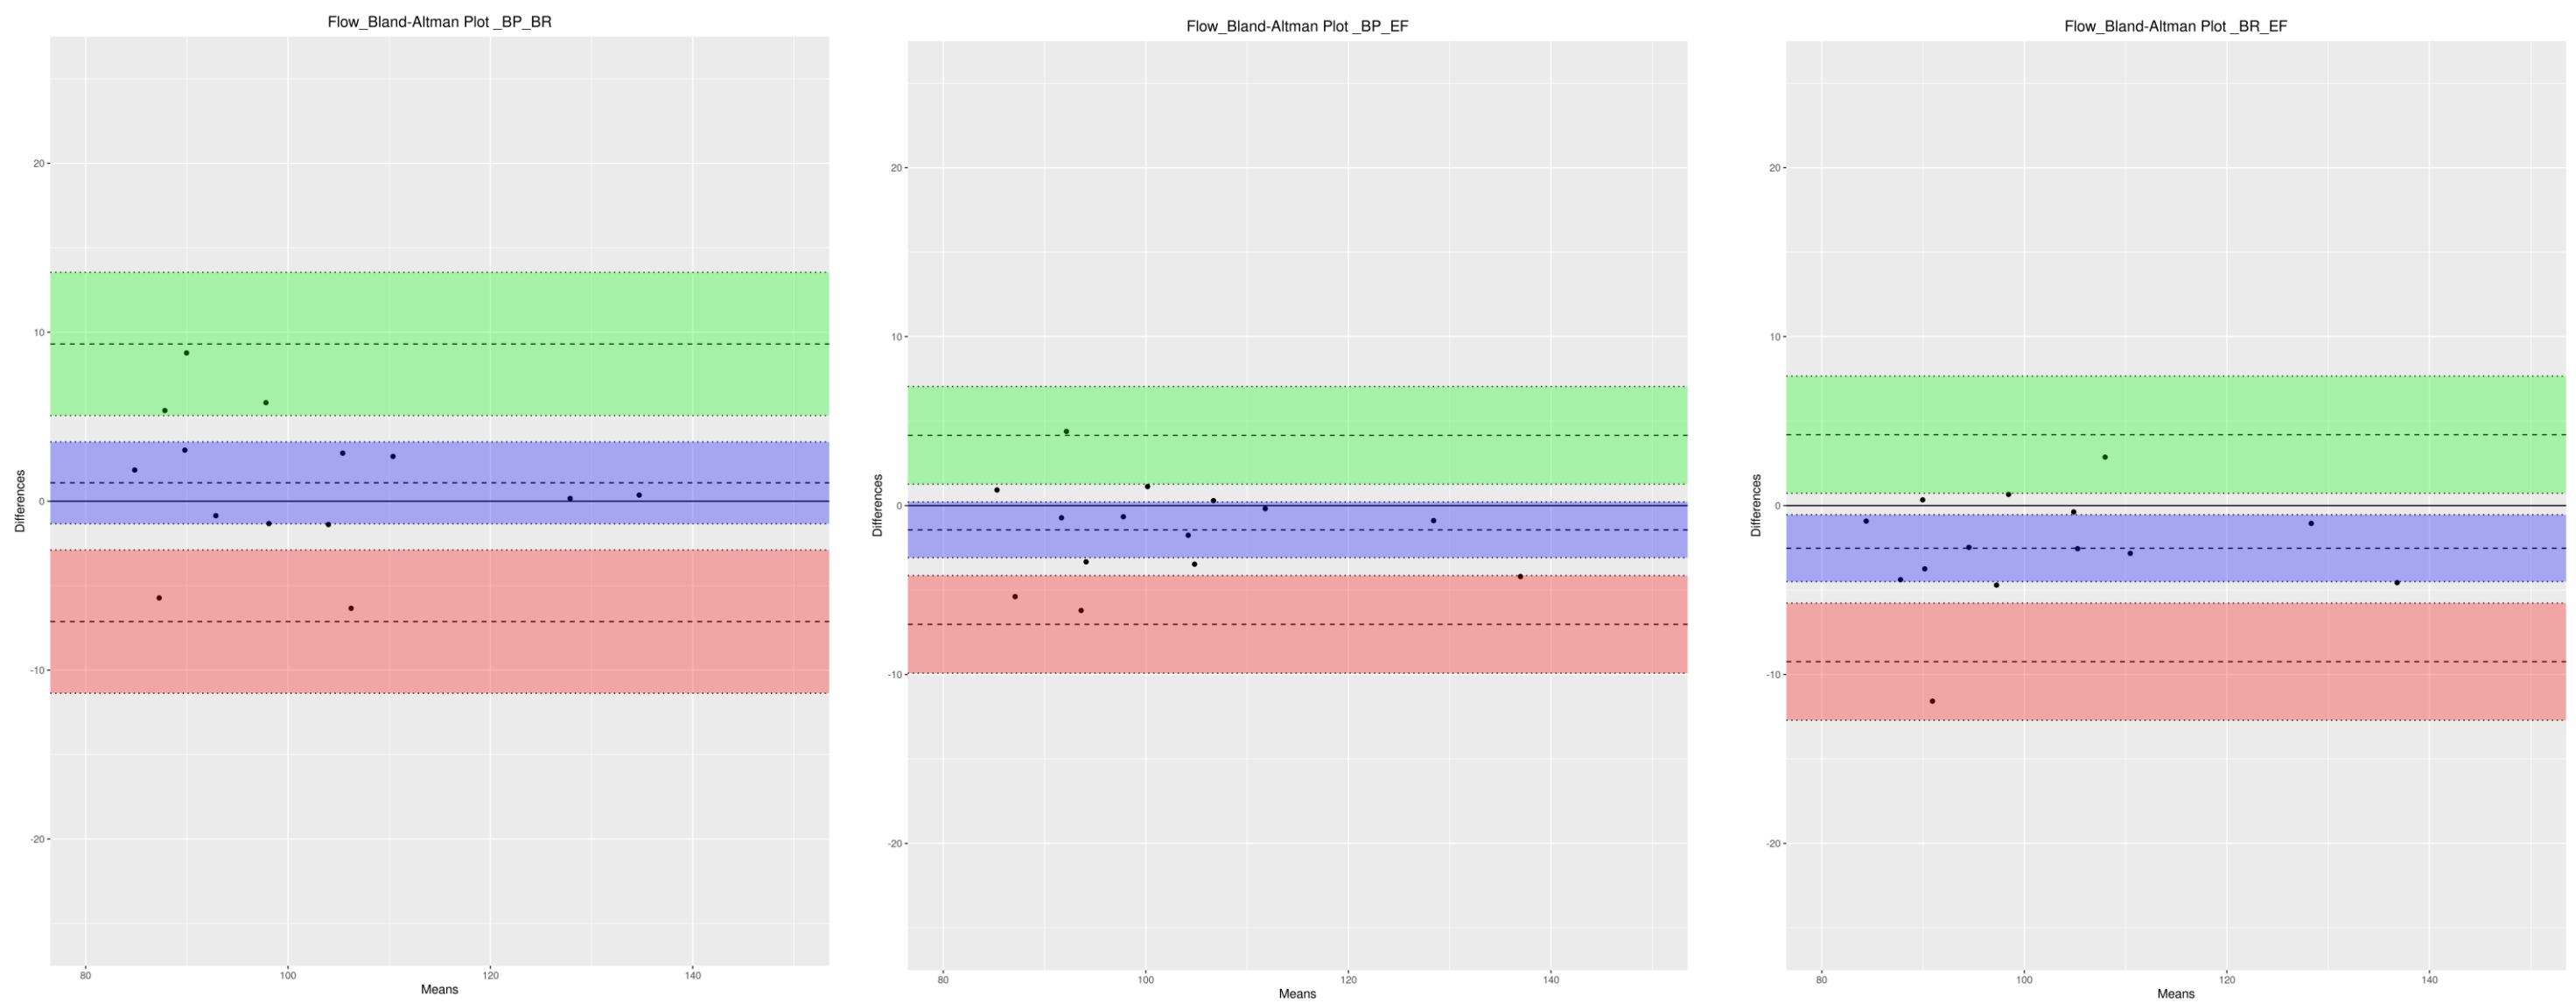

# MaxAxialWallShearStressAllPhases

Phi1.5T

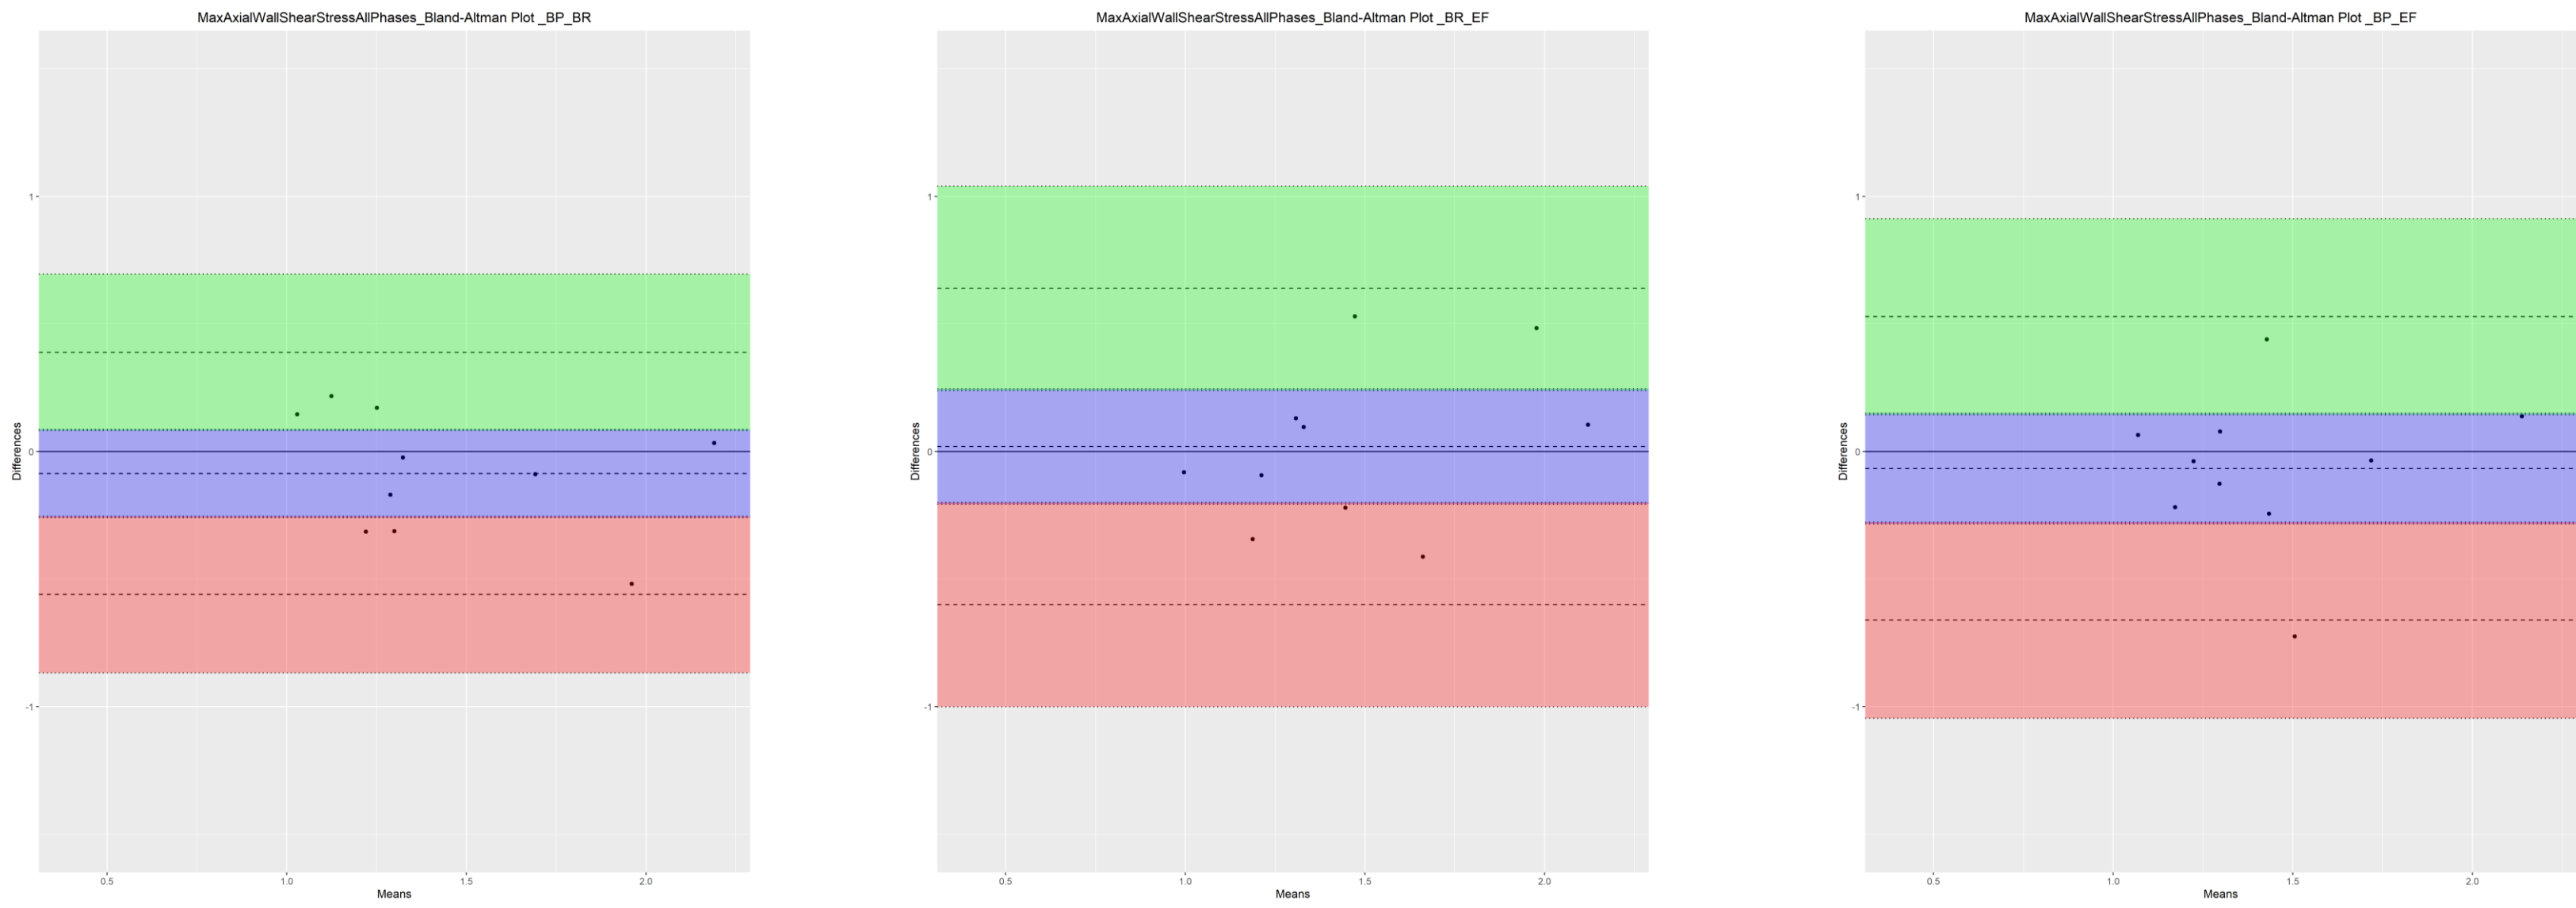

Phi3T

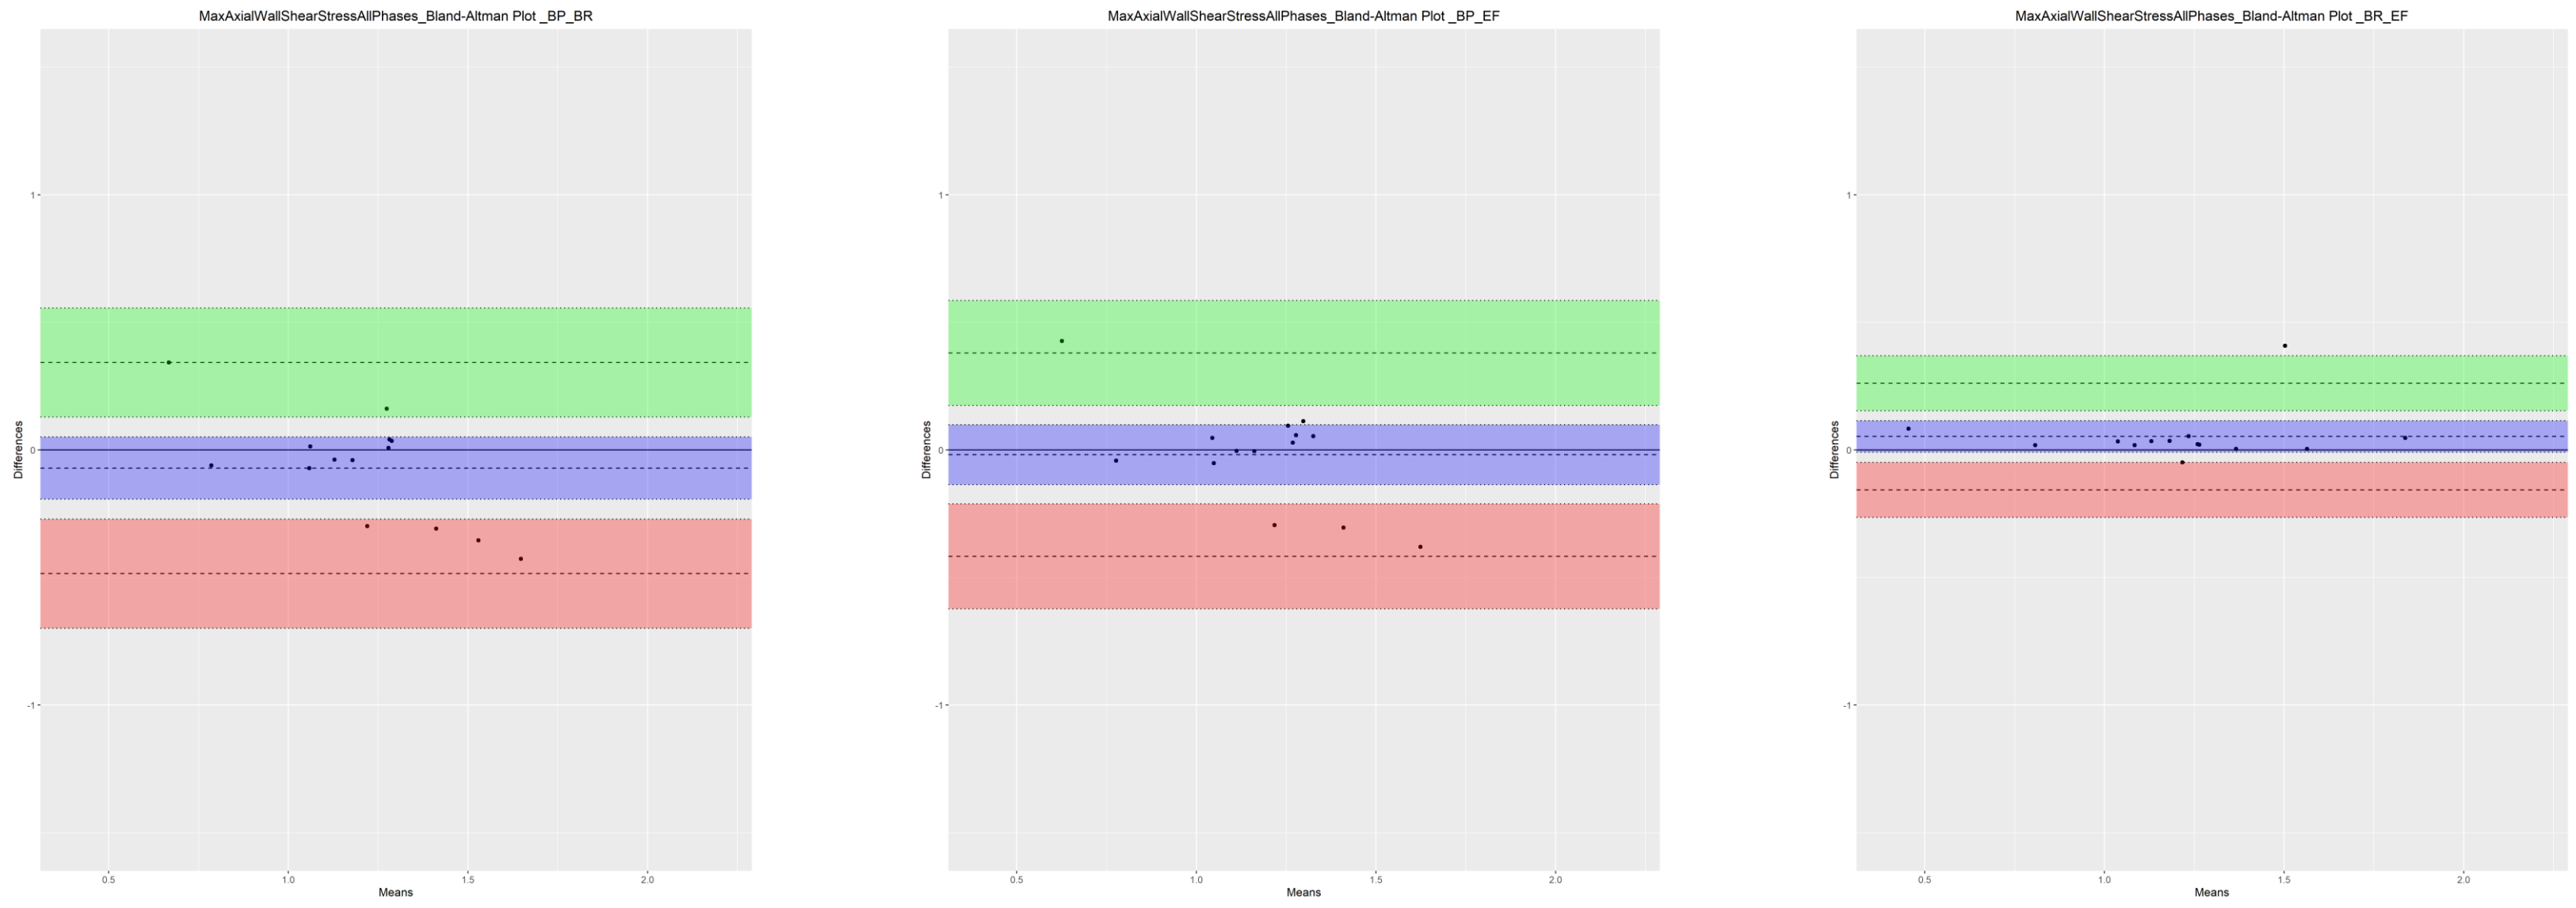

Siem3T

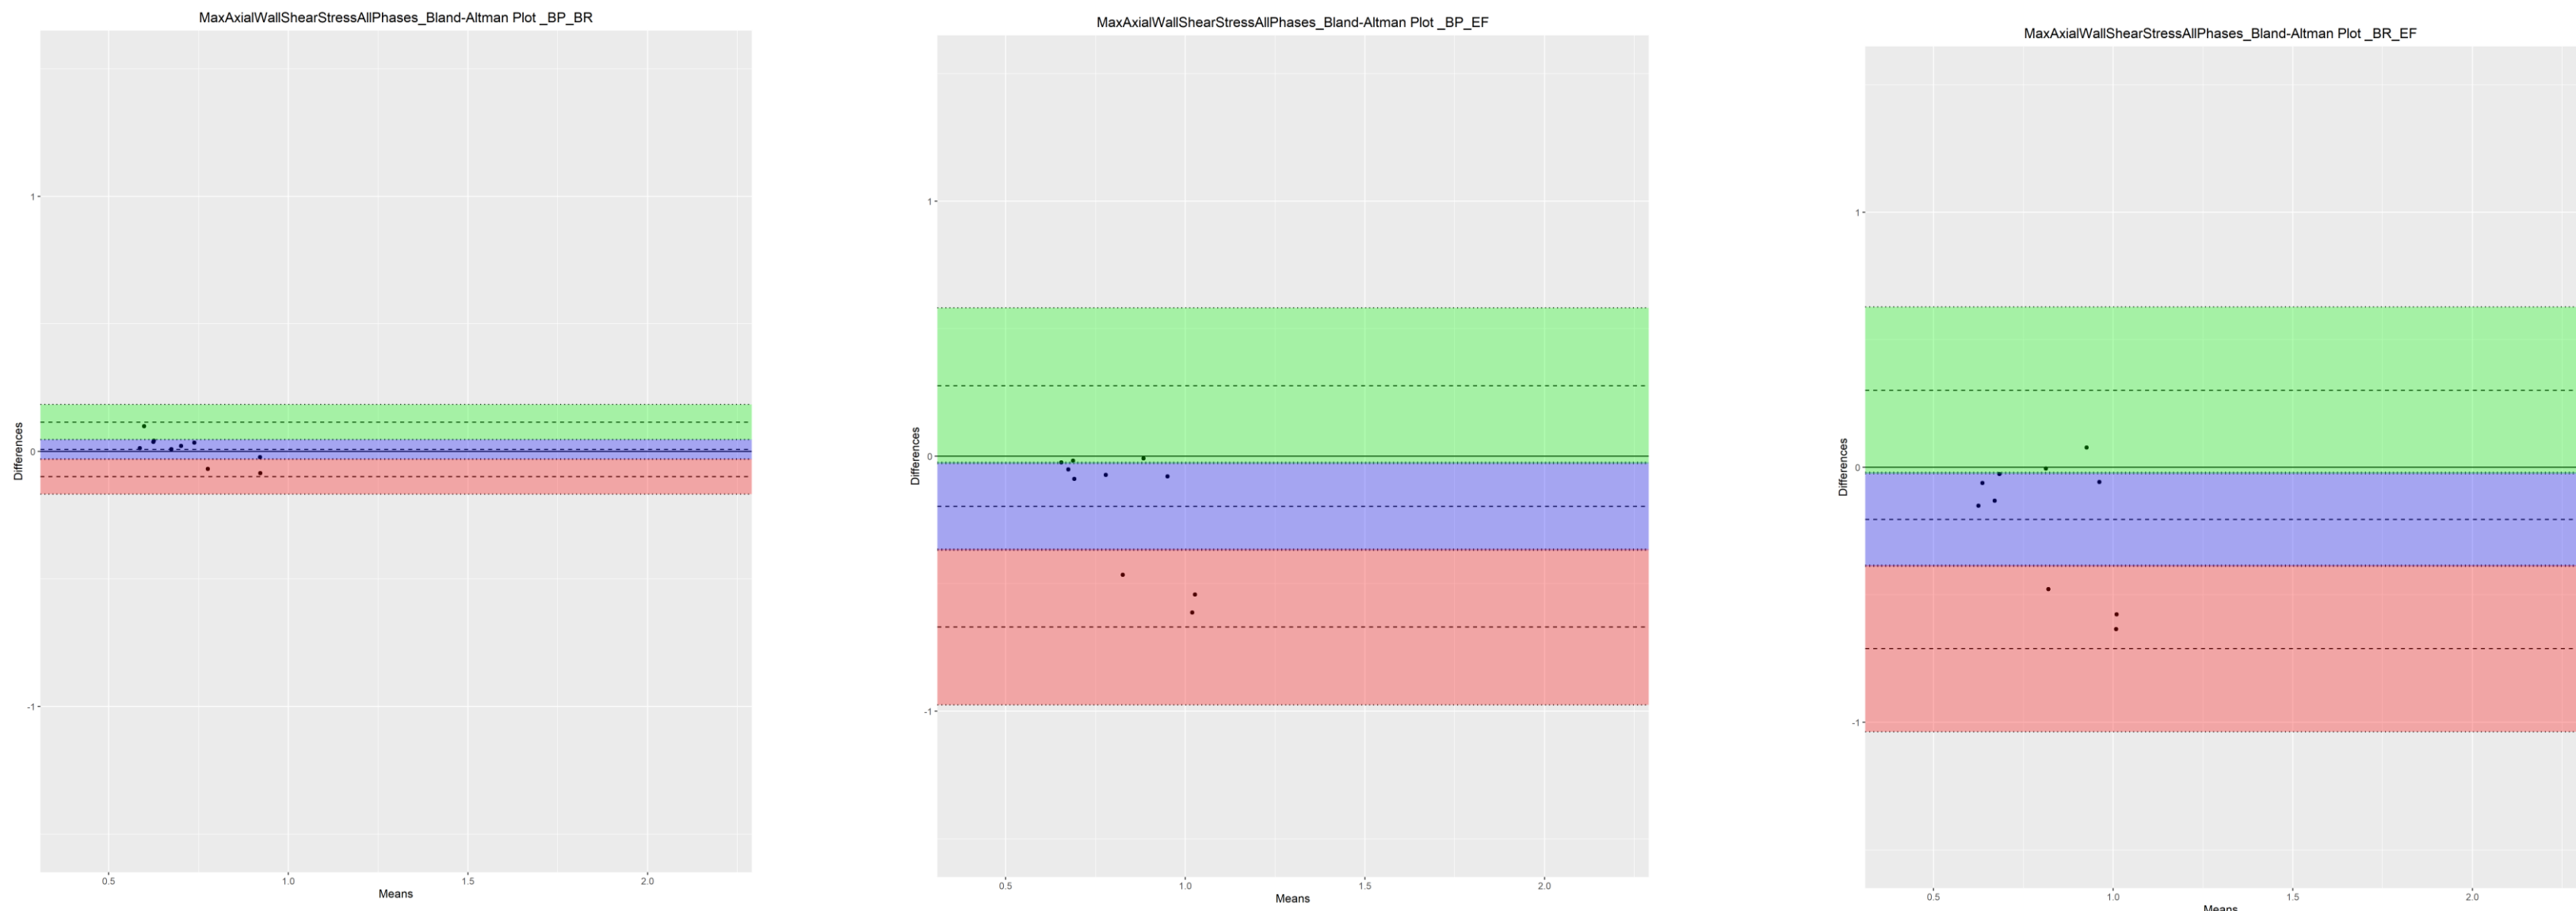

# MaxCircumferentialWallShearStressAllPhases

Phi1.5T

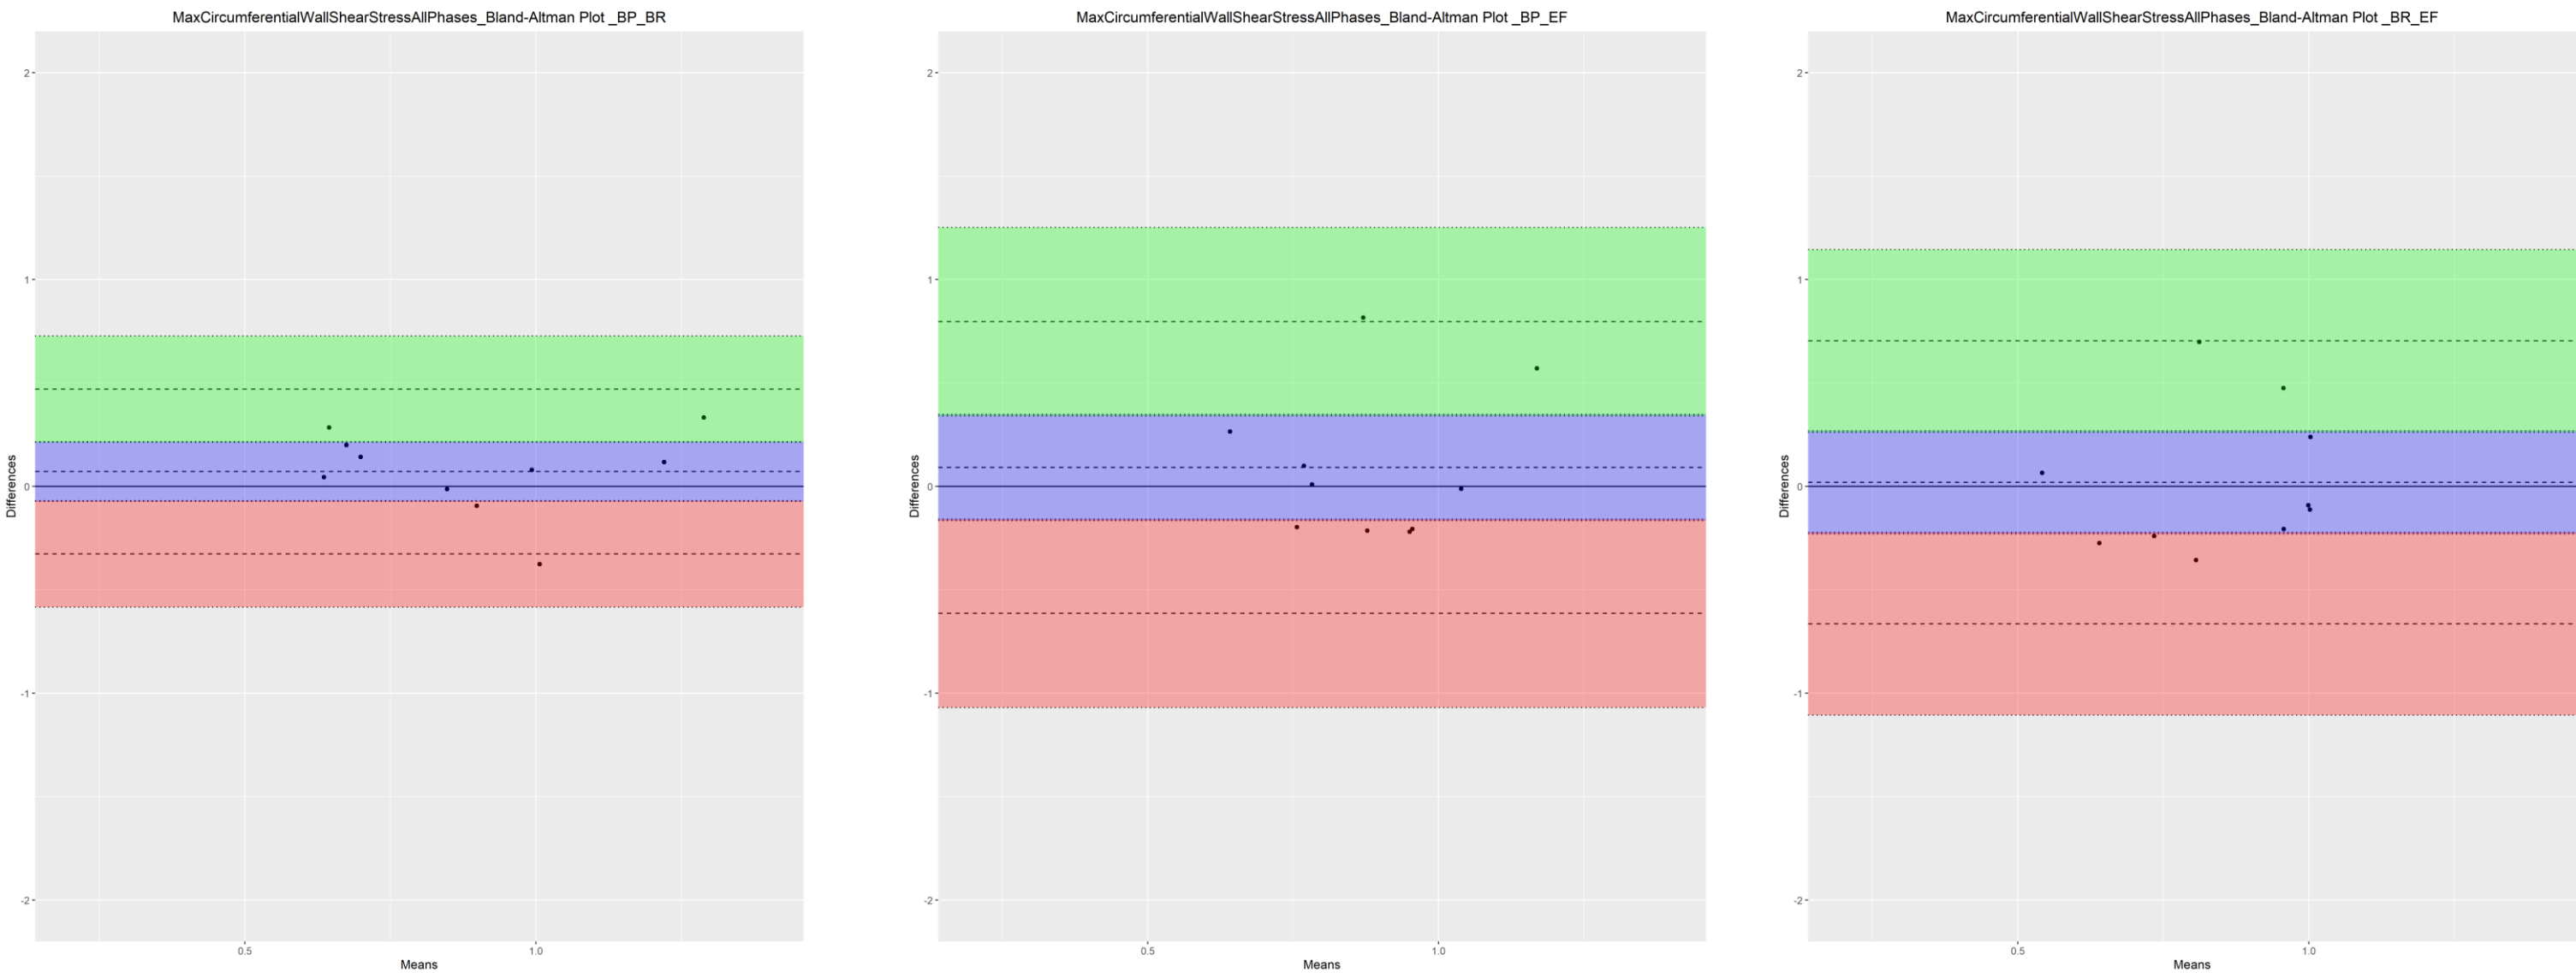

Phi3T

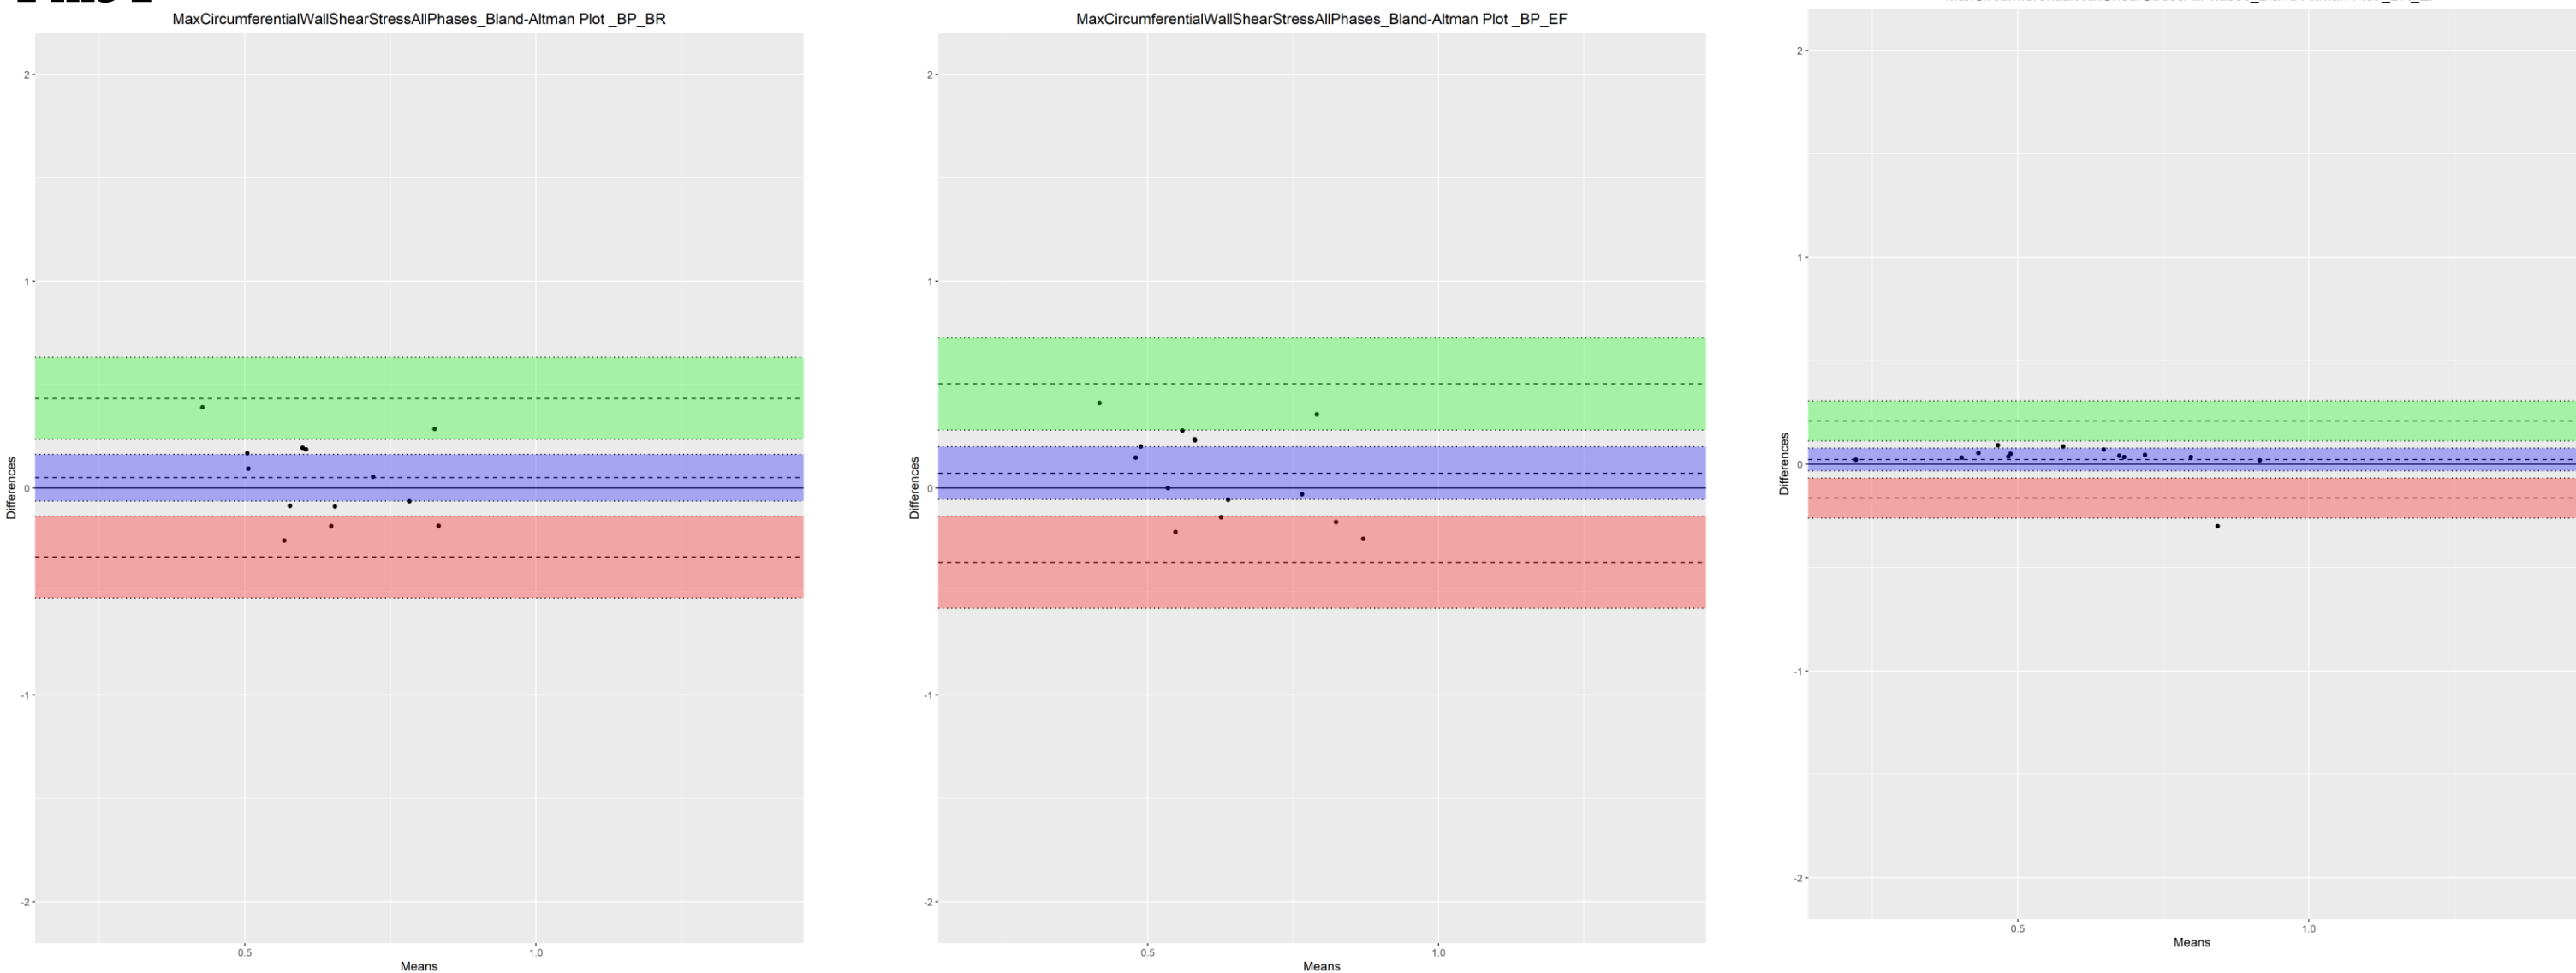

Siem3T

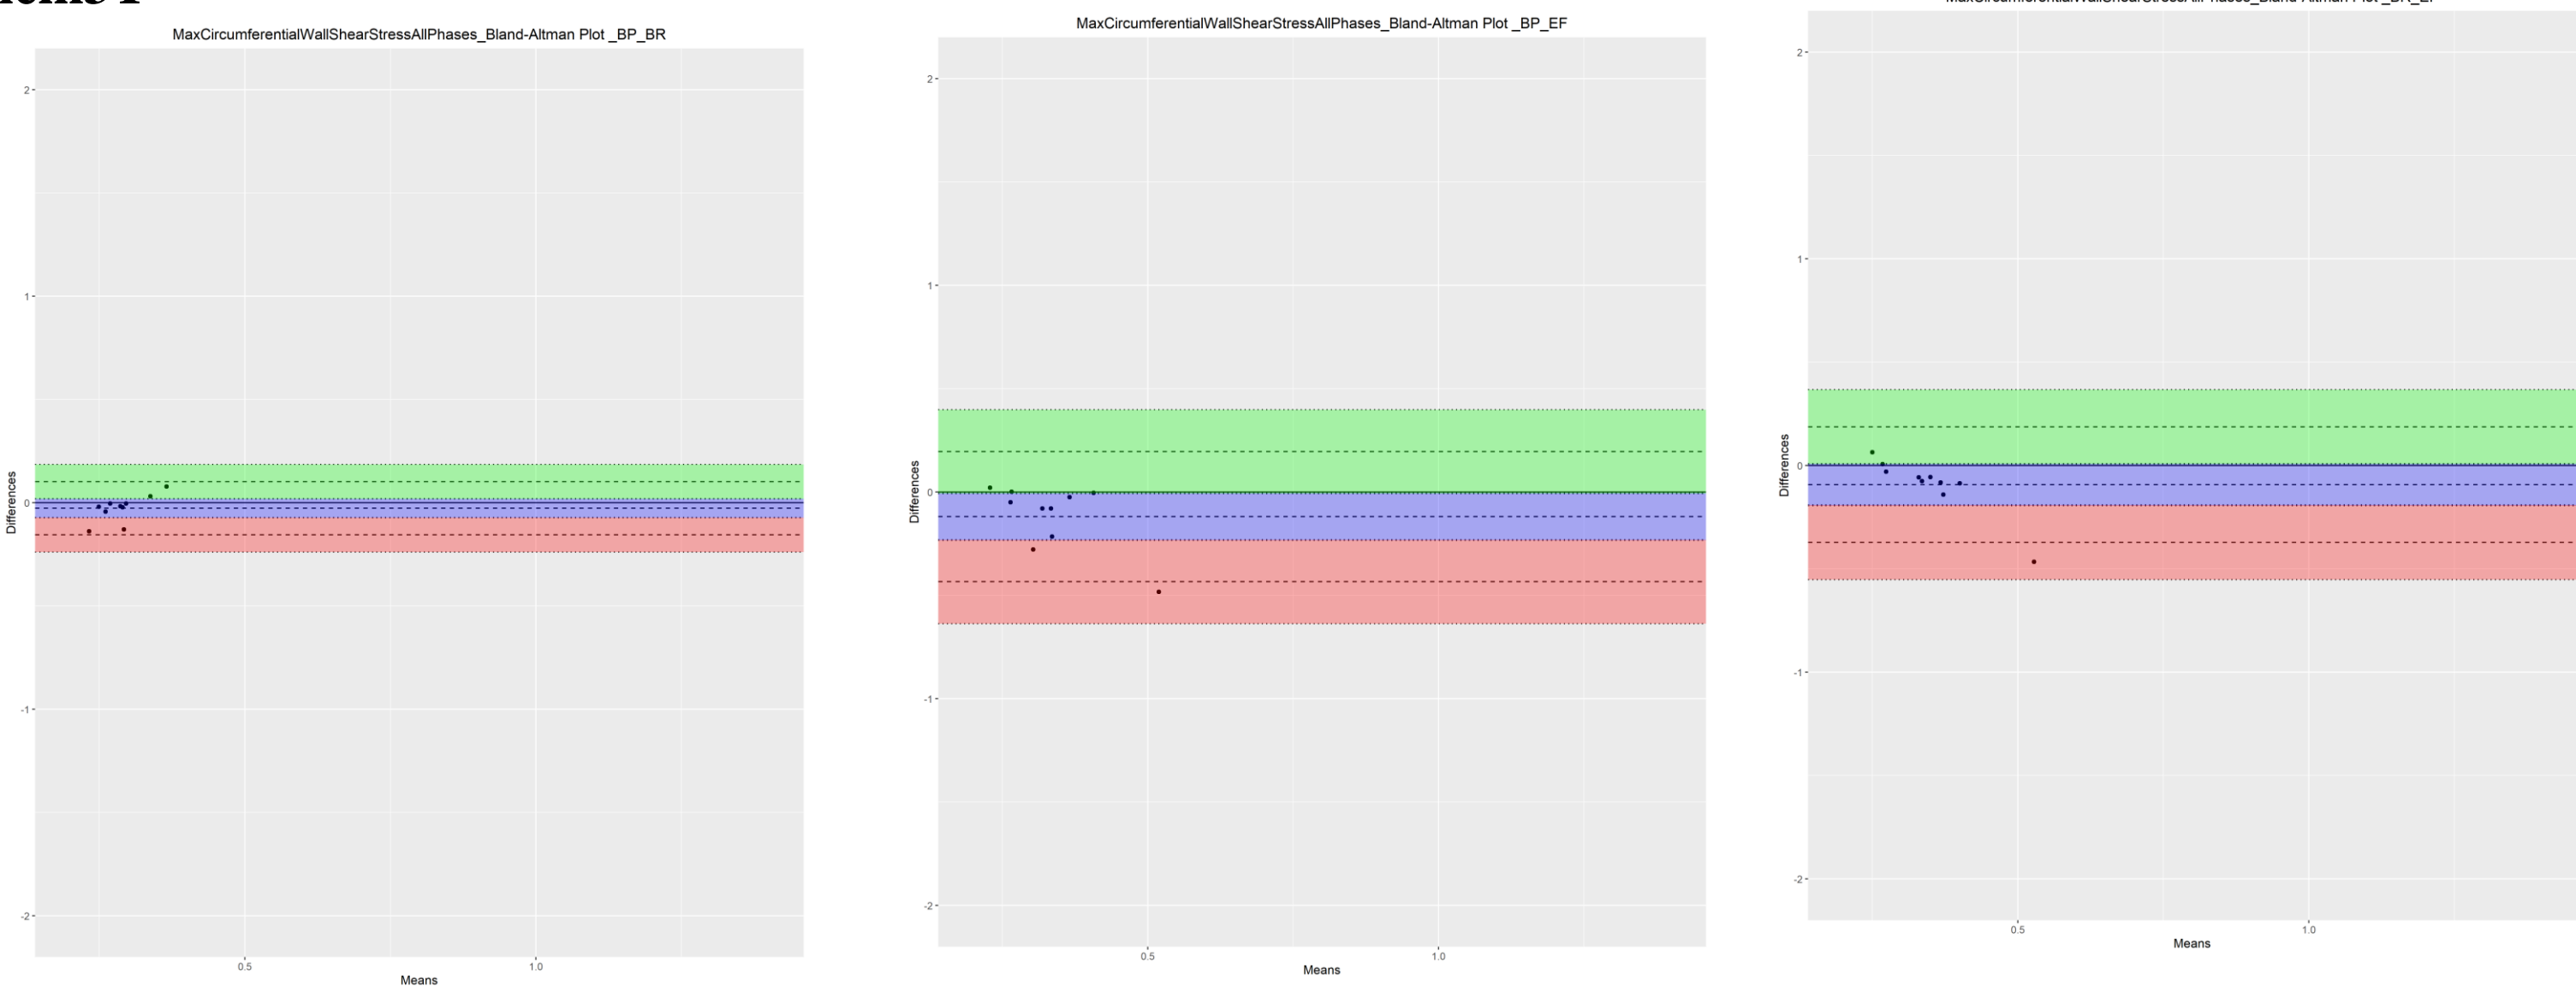



# MaximumFlow

## Phi1.5T

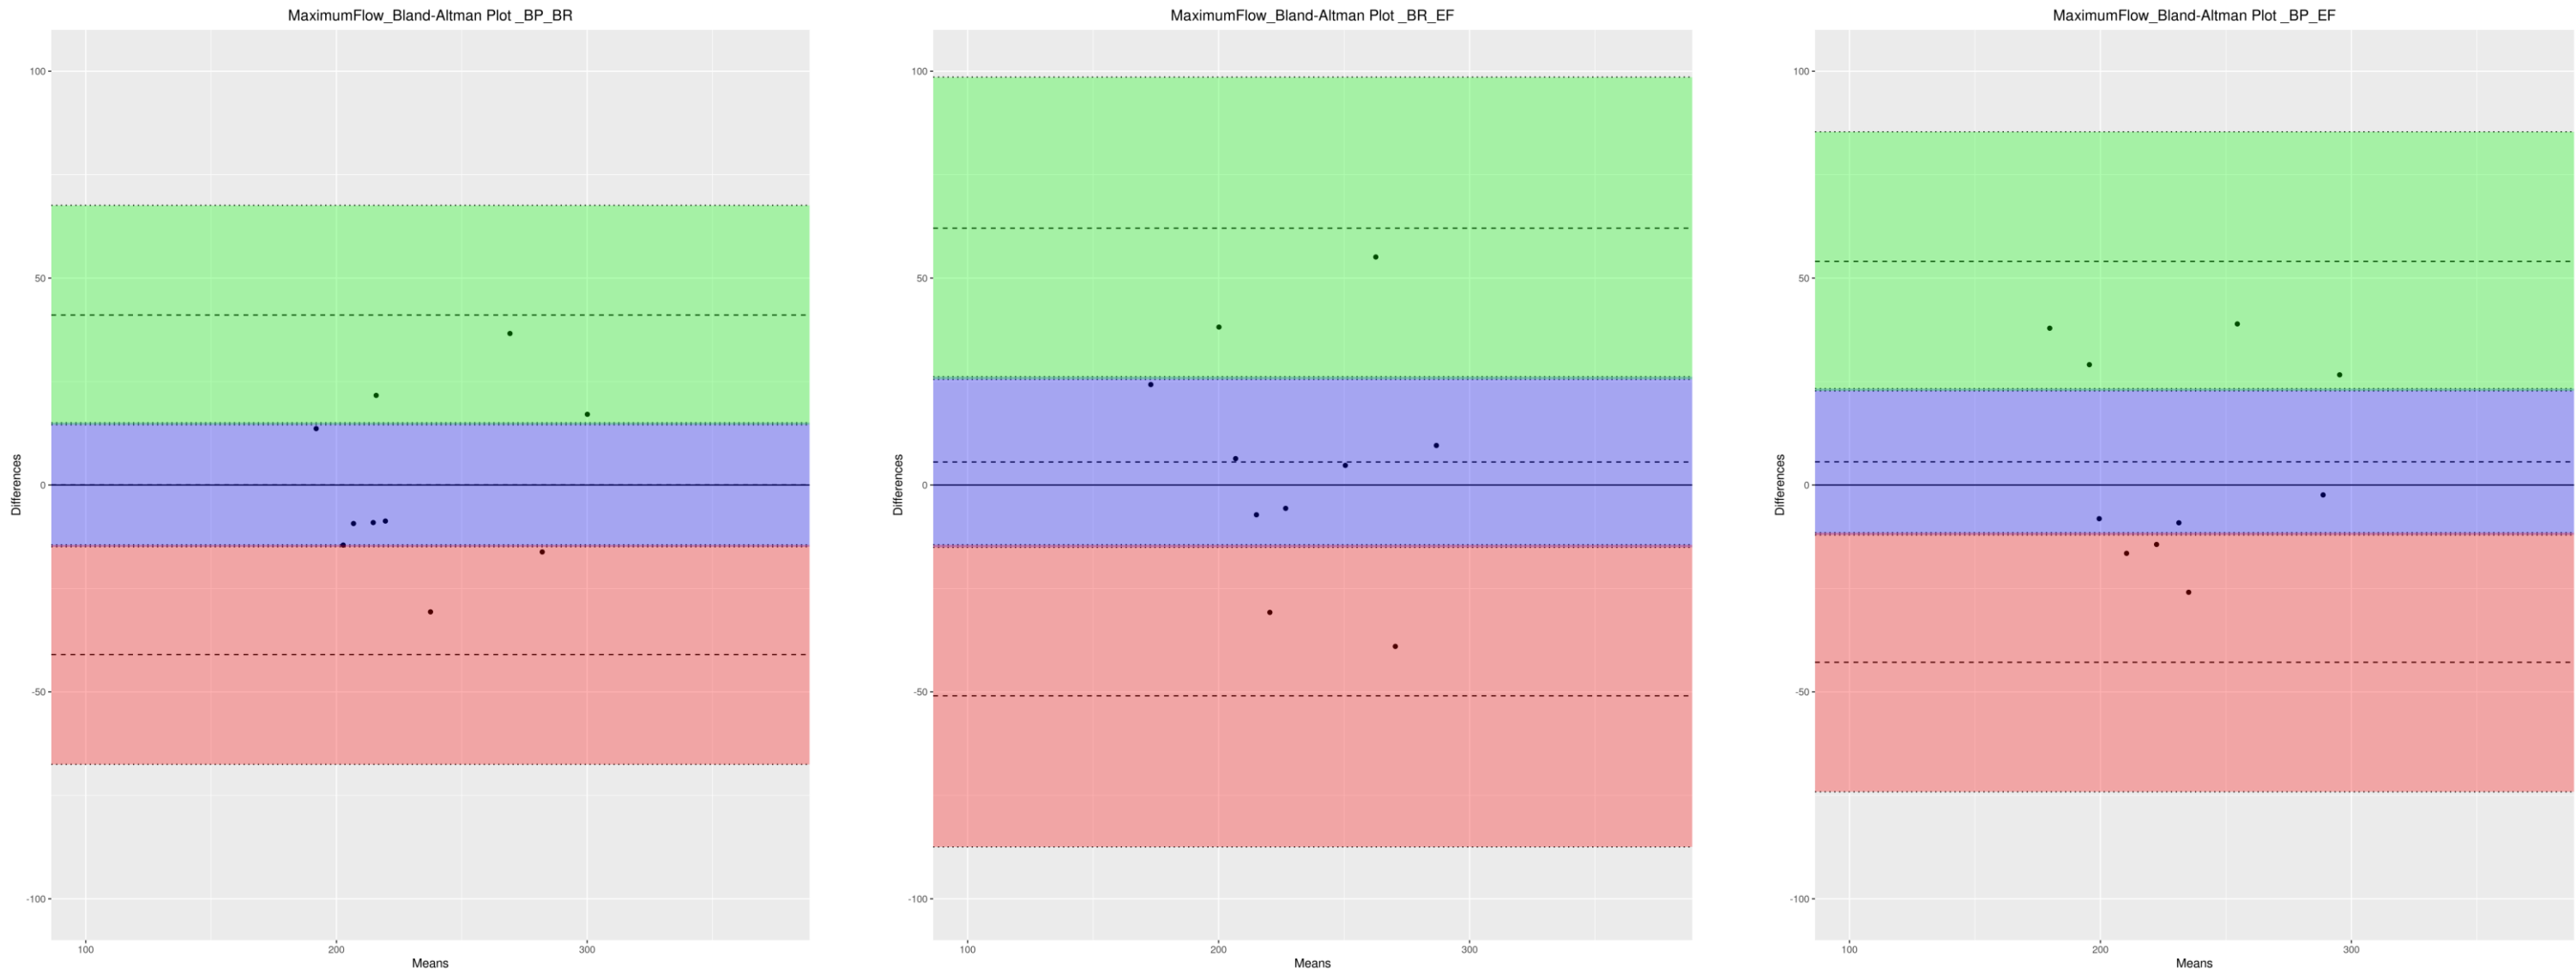

## Phi3T

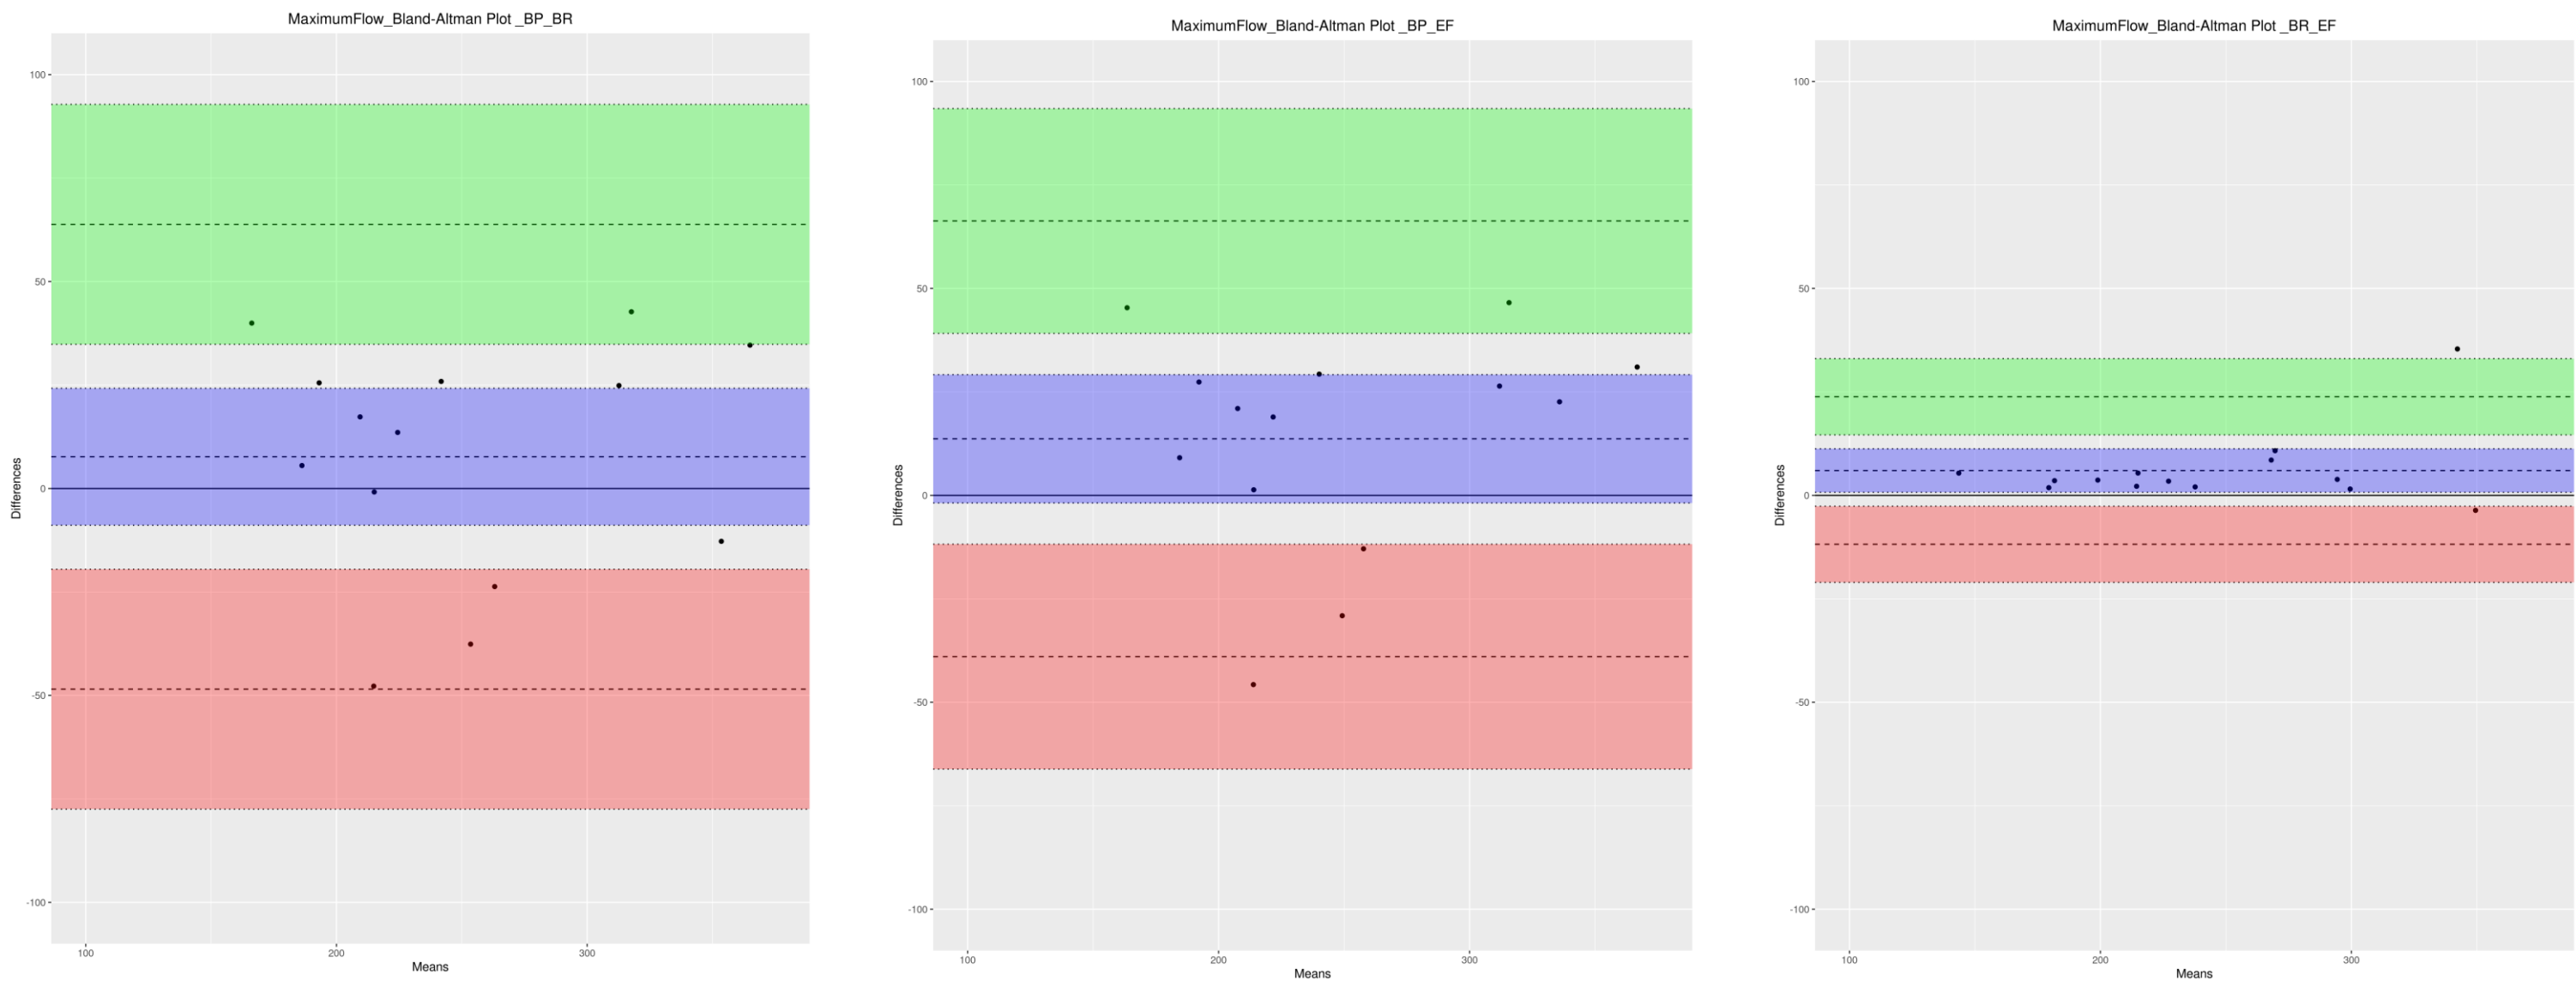

## Siem3T

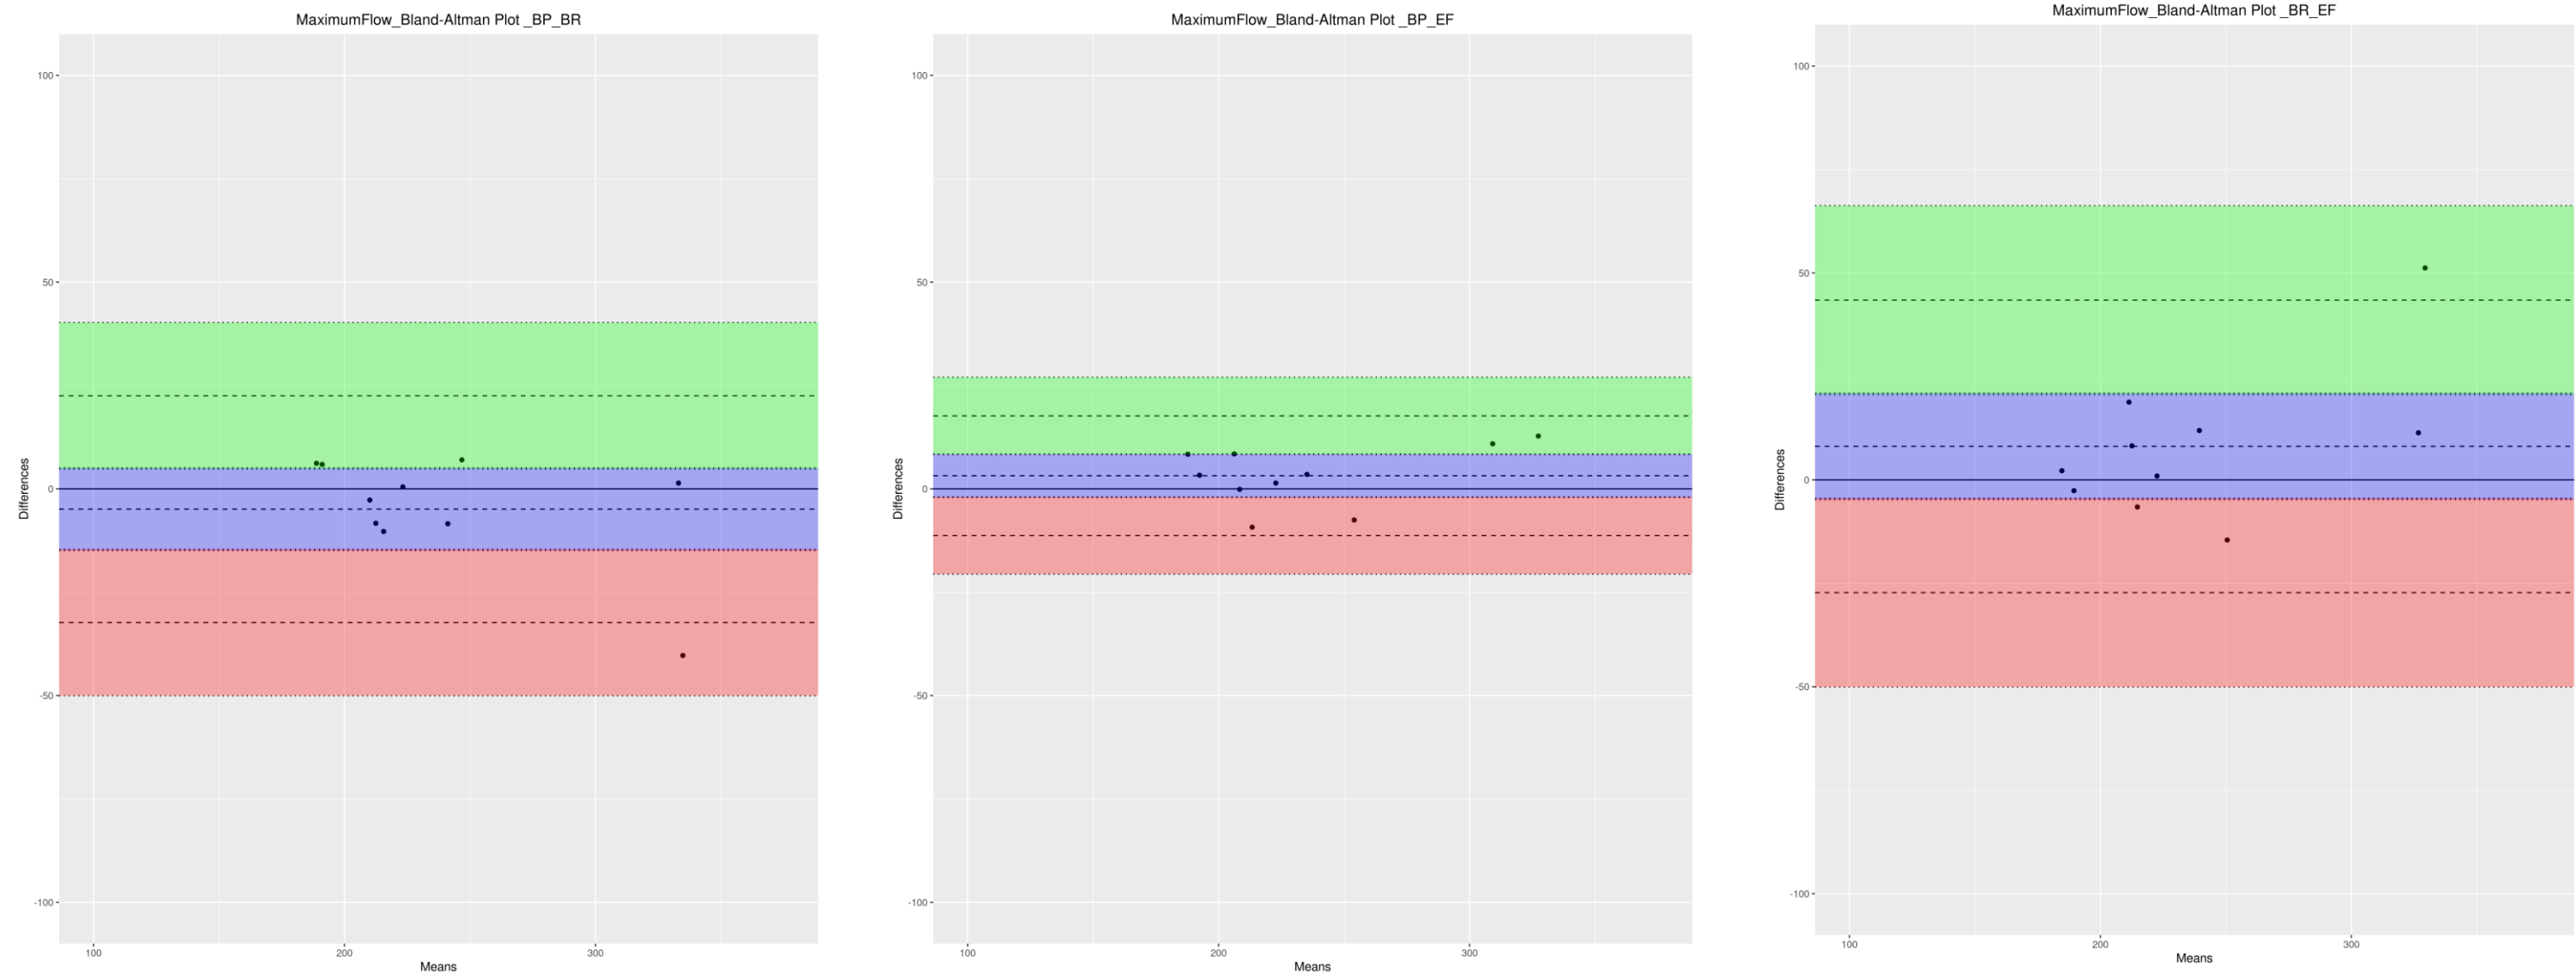

# MaximumMeanVelocity

Phi1.5T

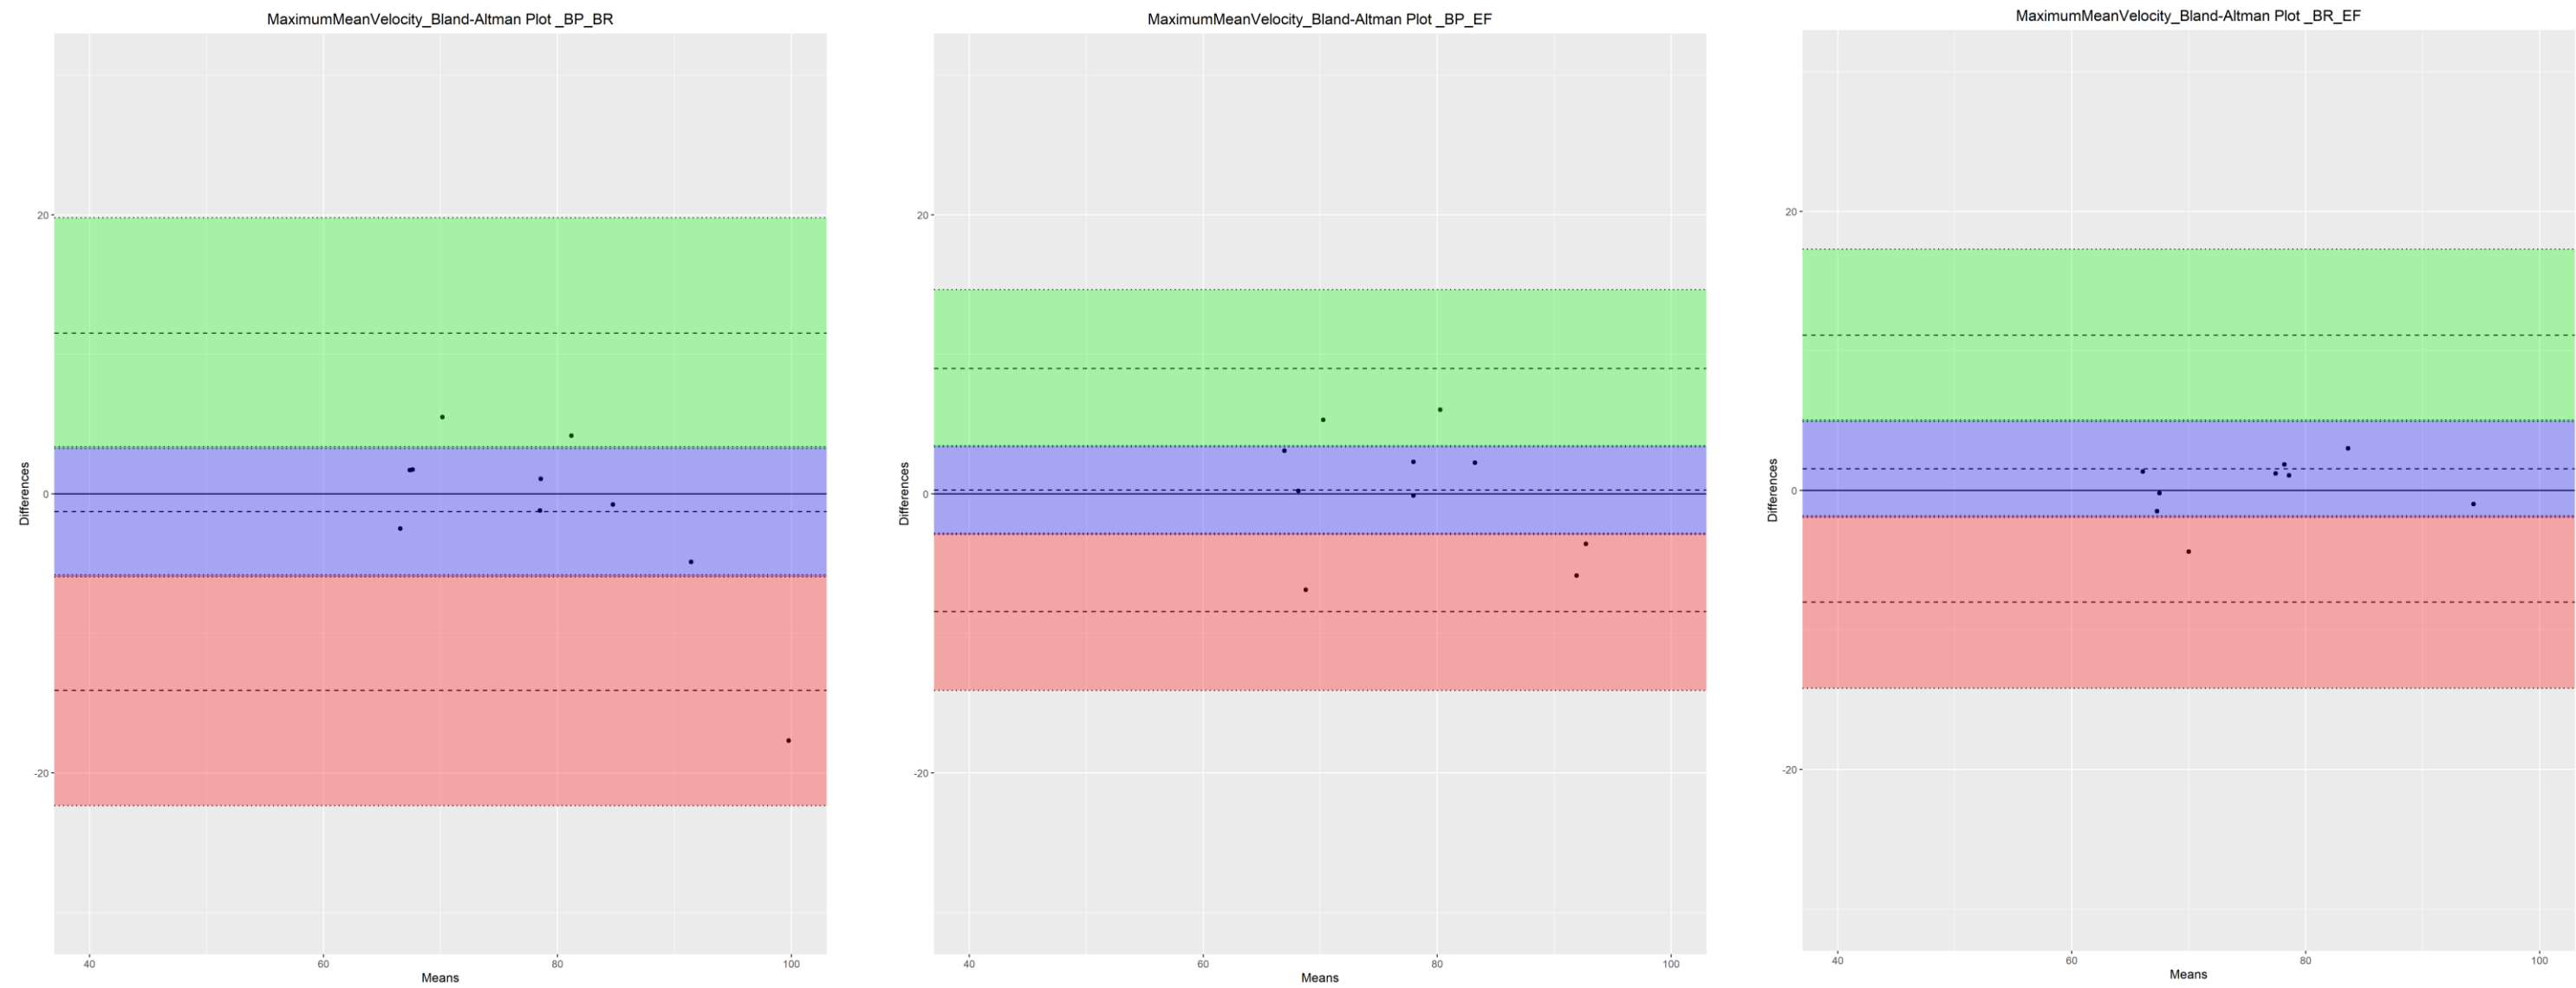

Phi3T

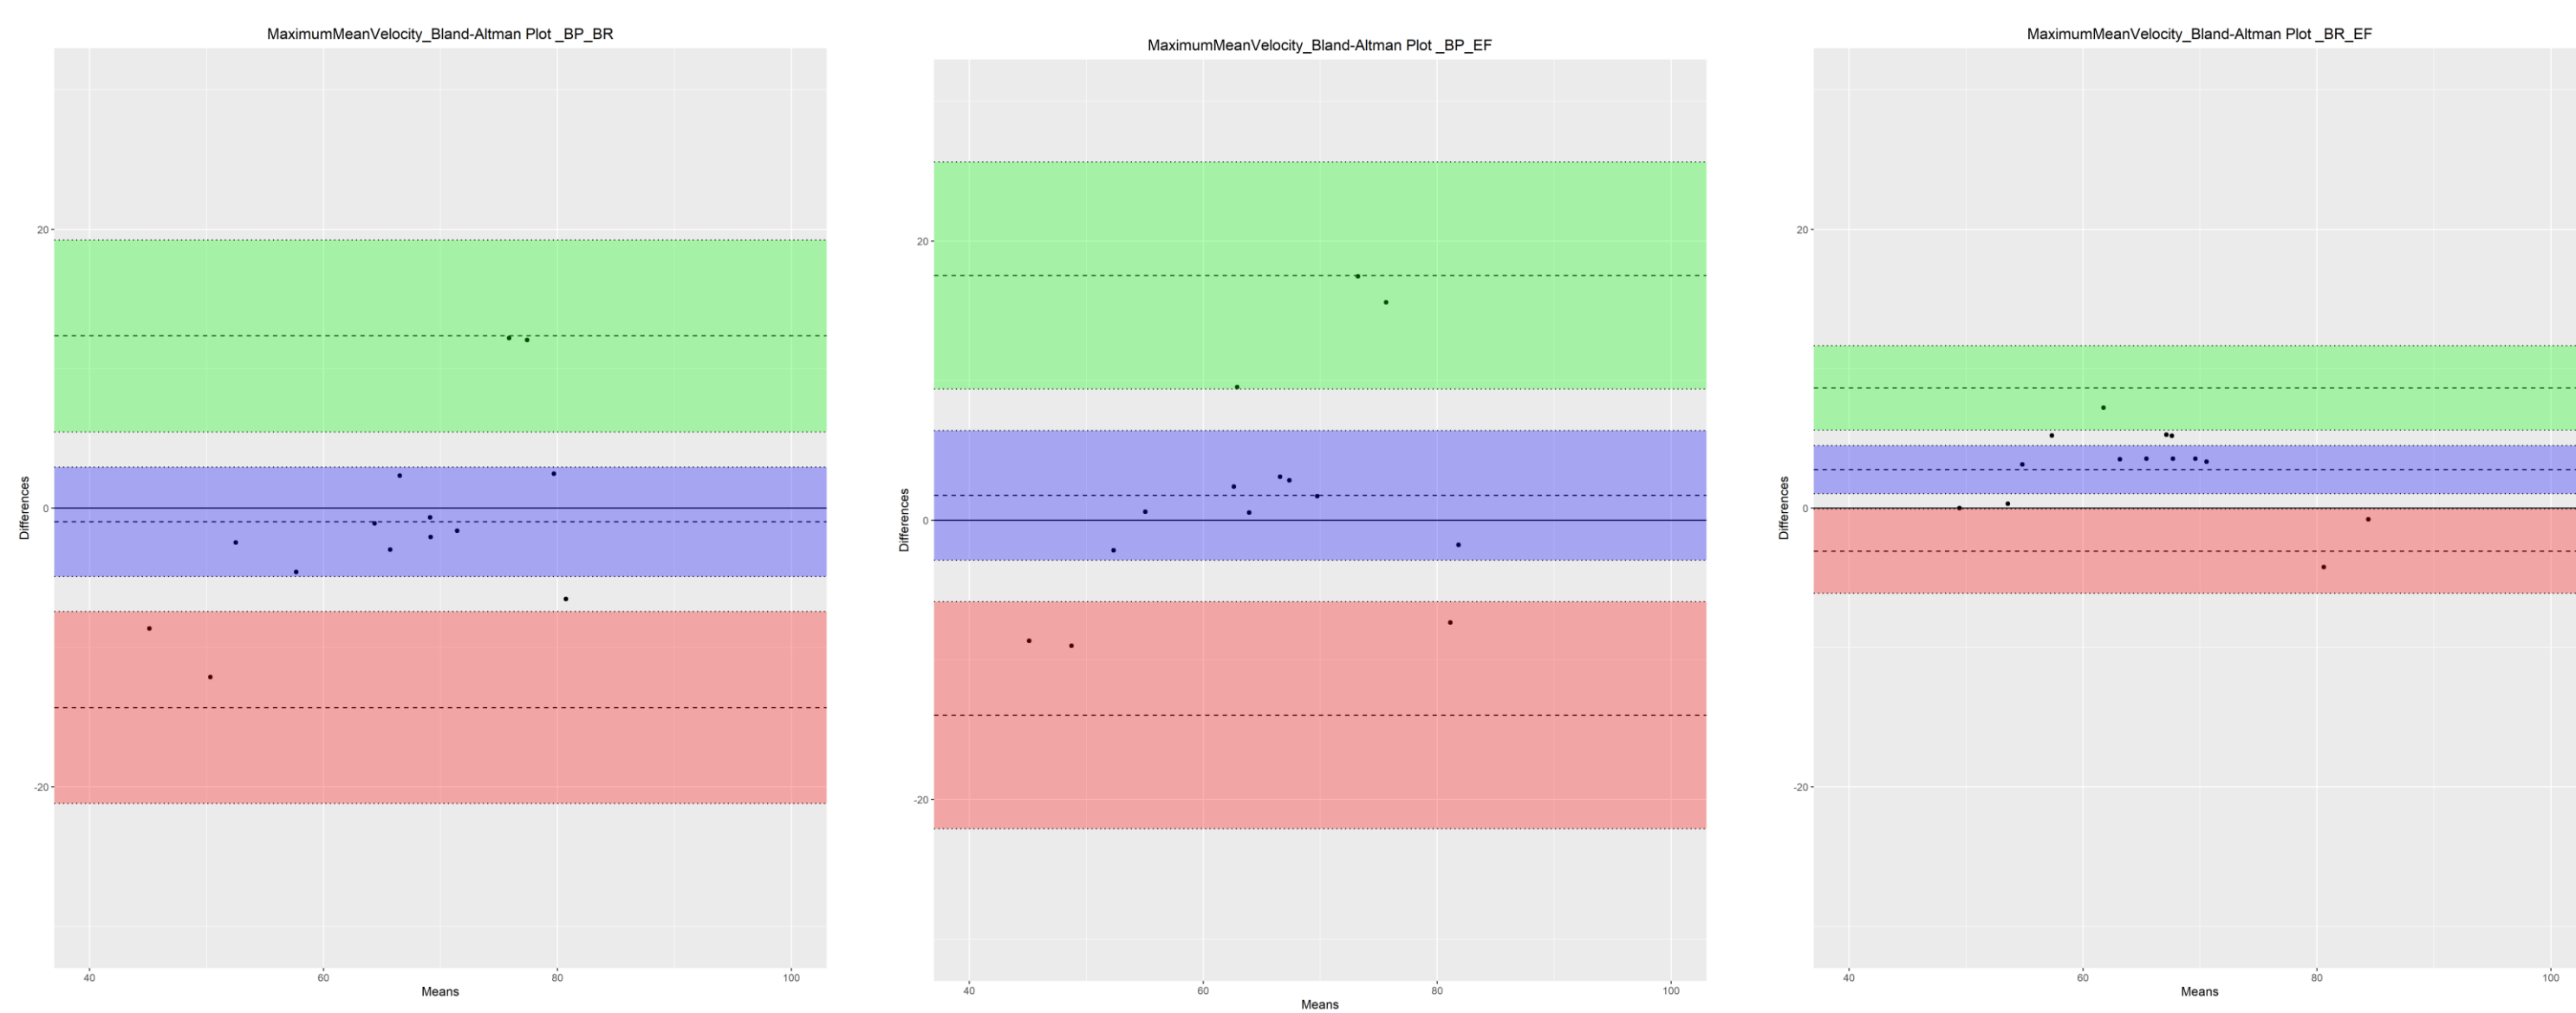

Siem3T

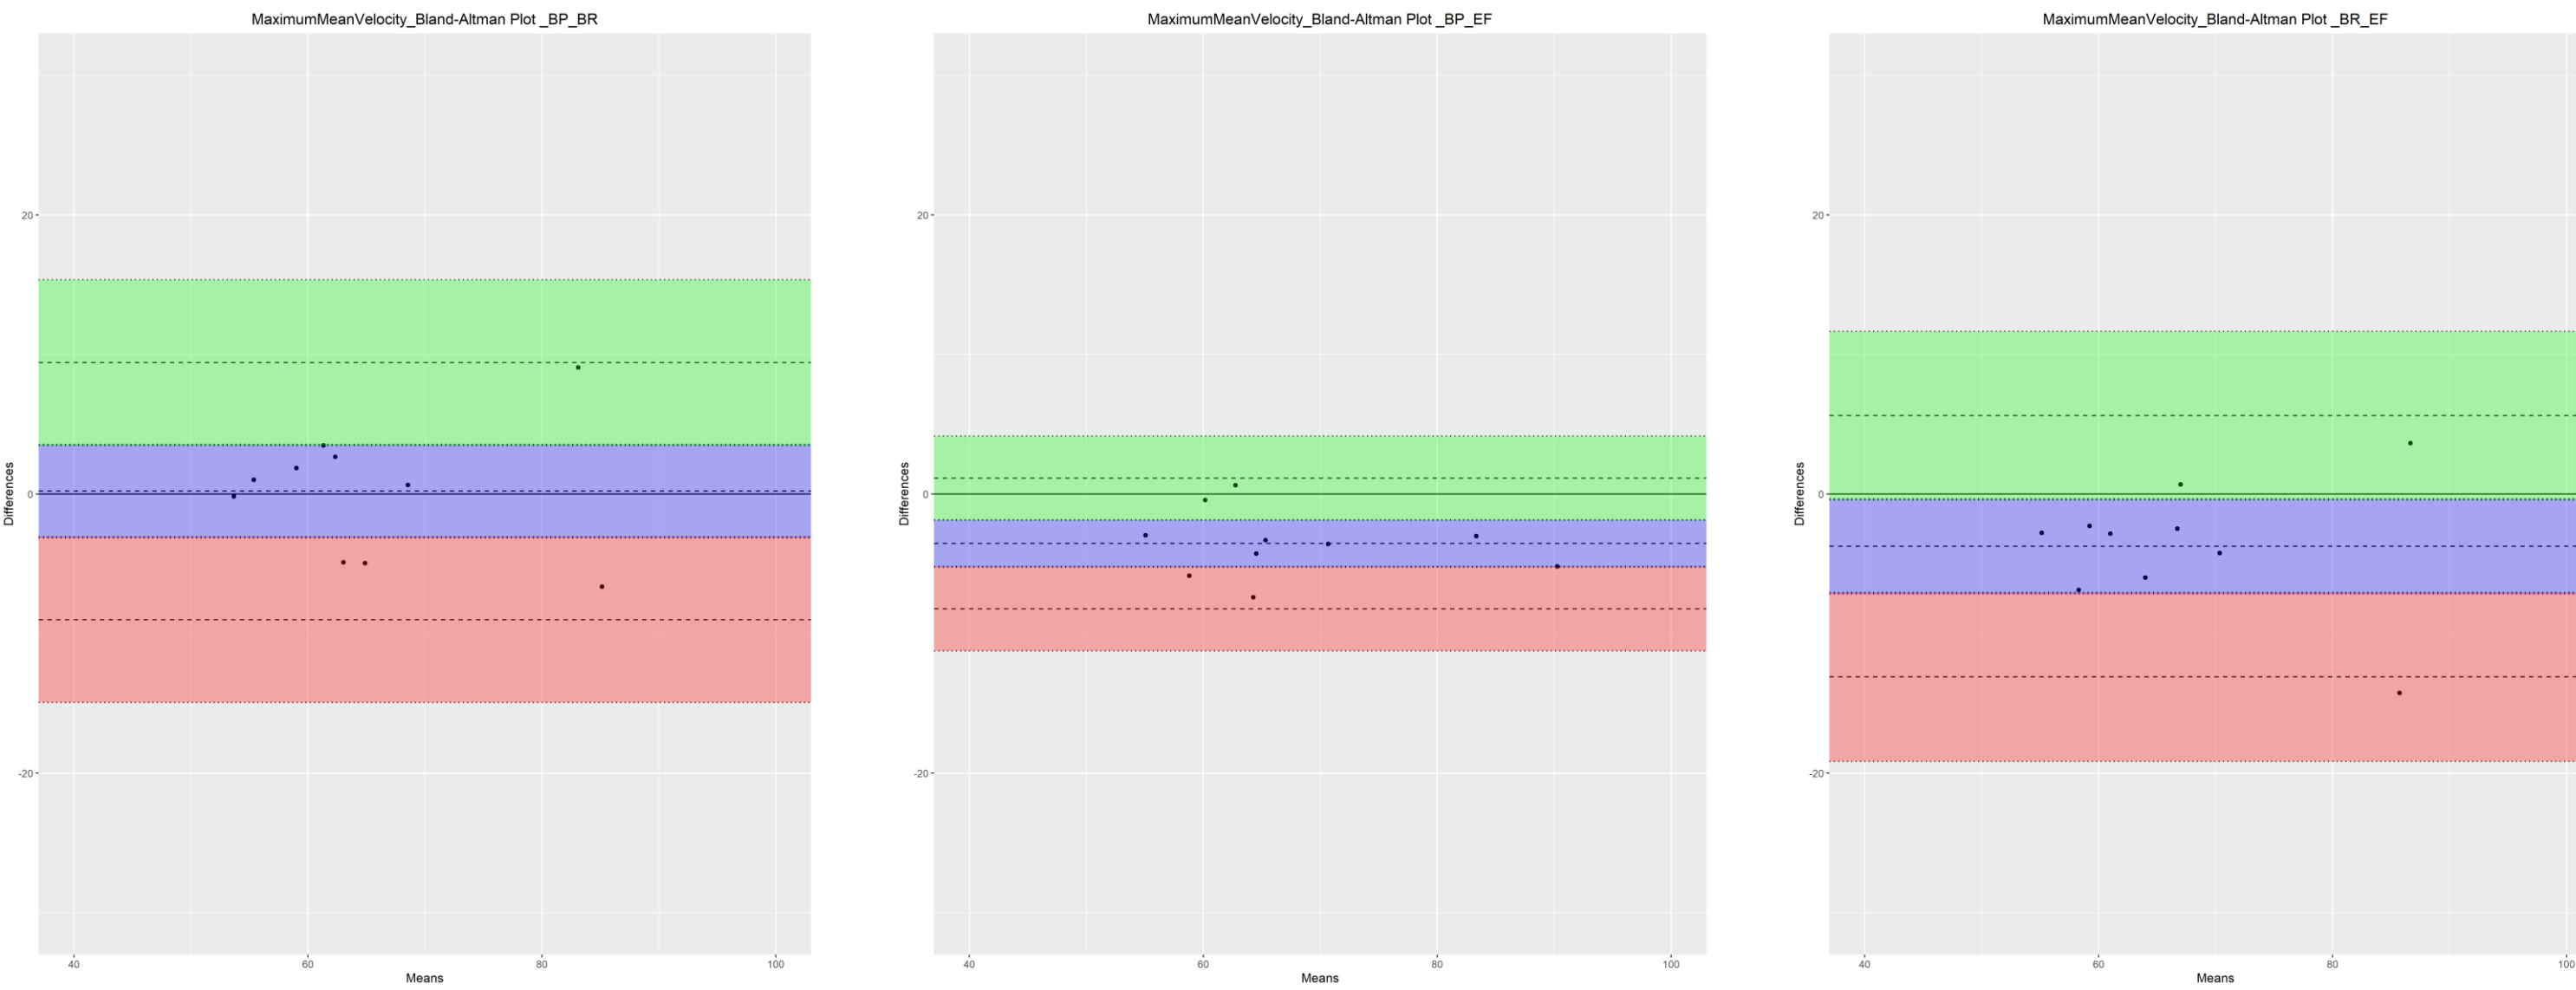

# MaxPressureGradient

Phi1.5T

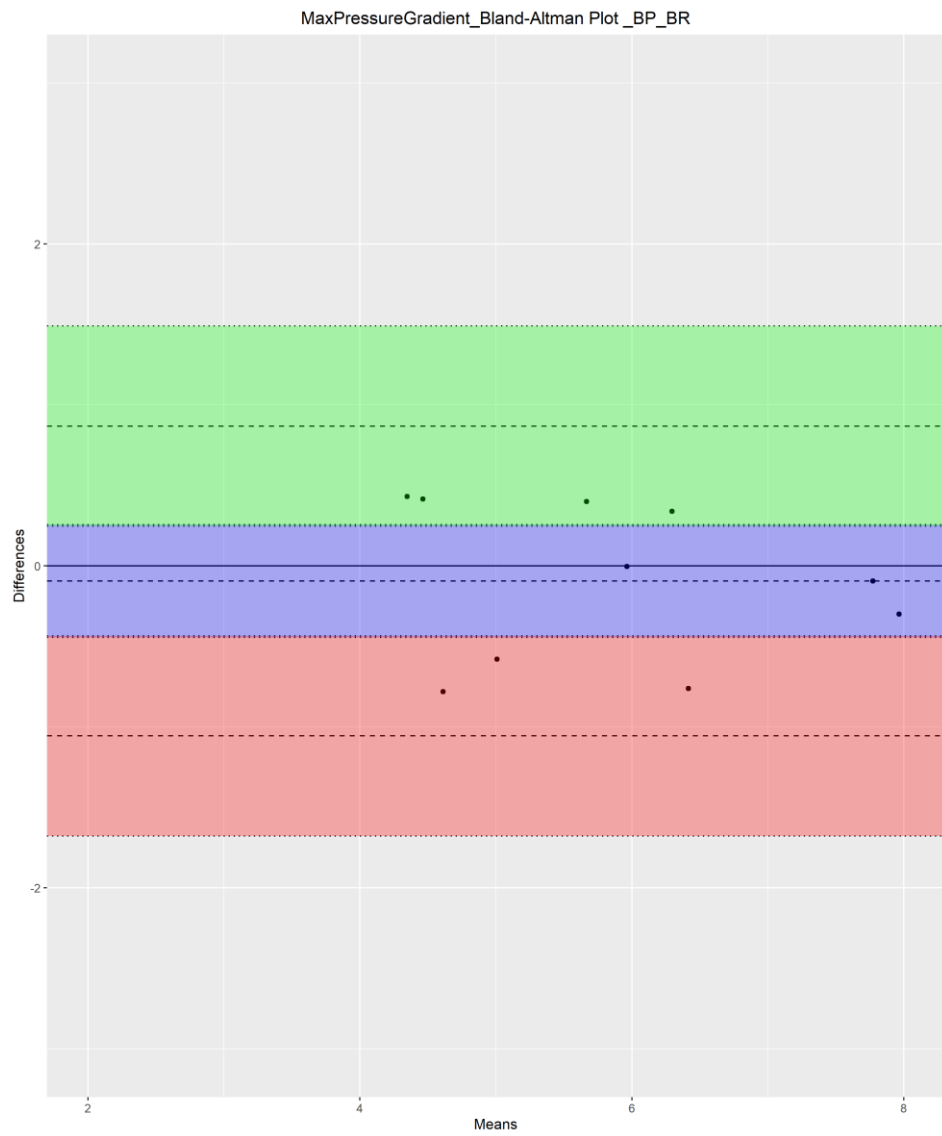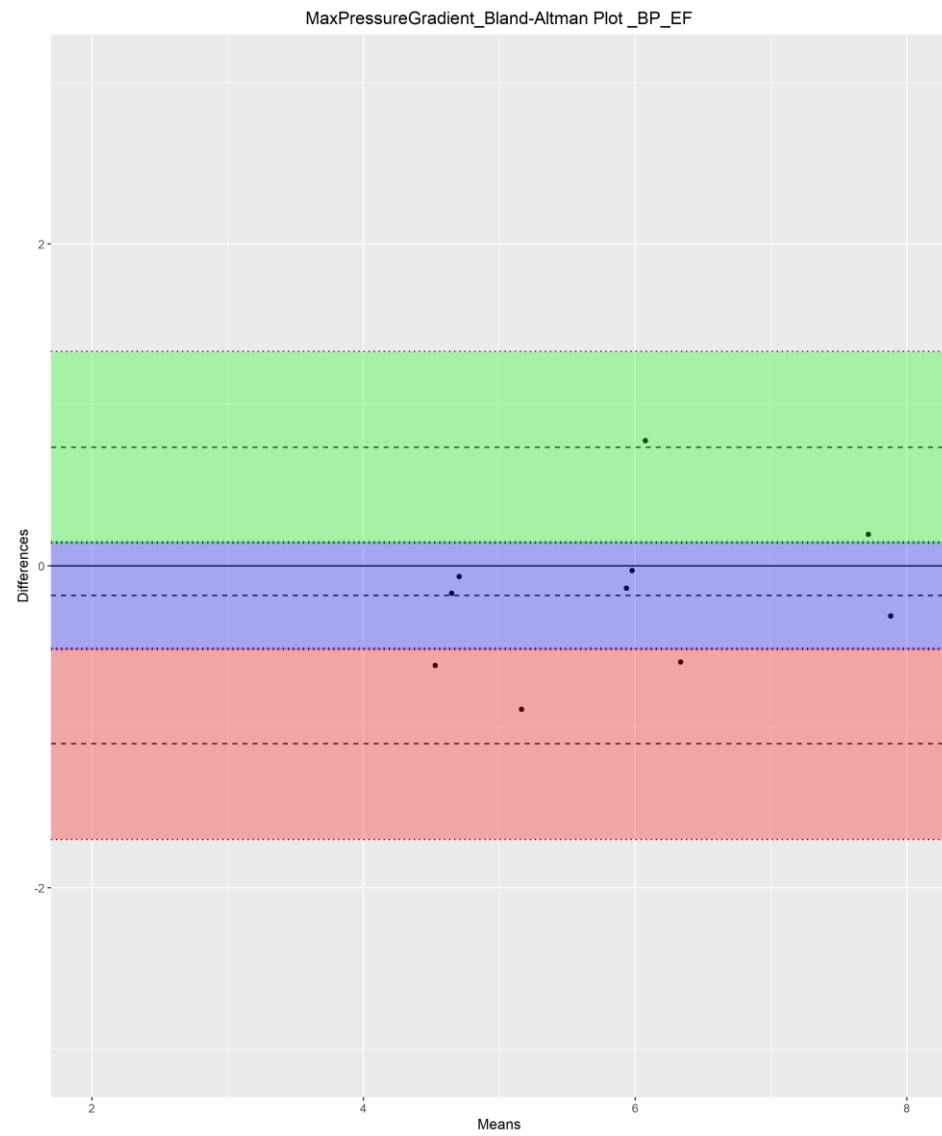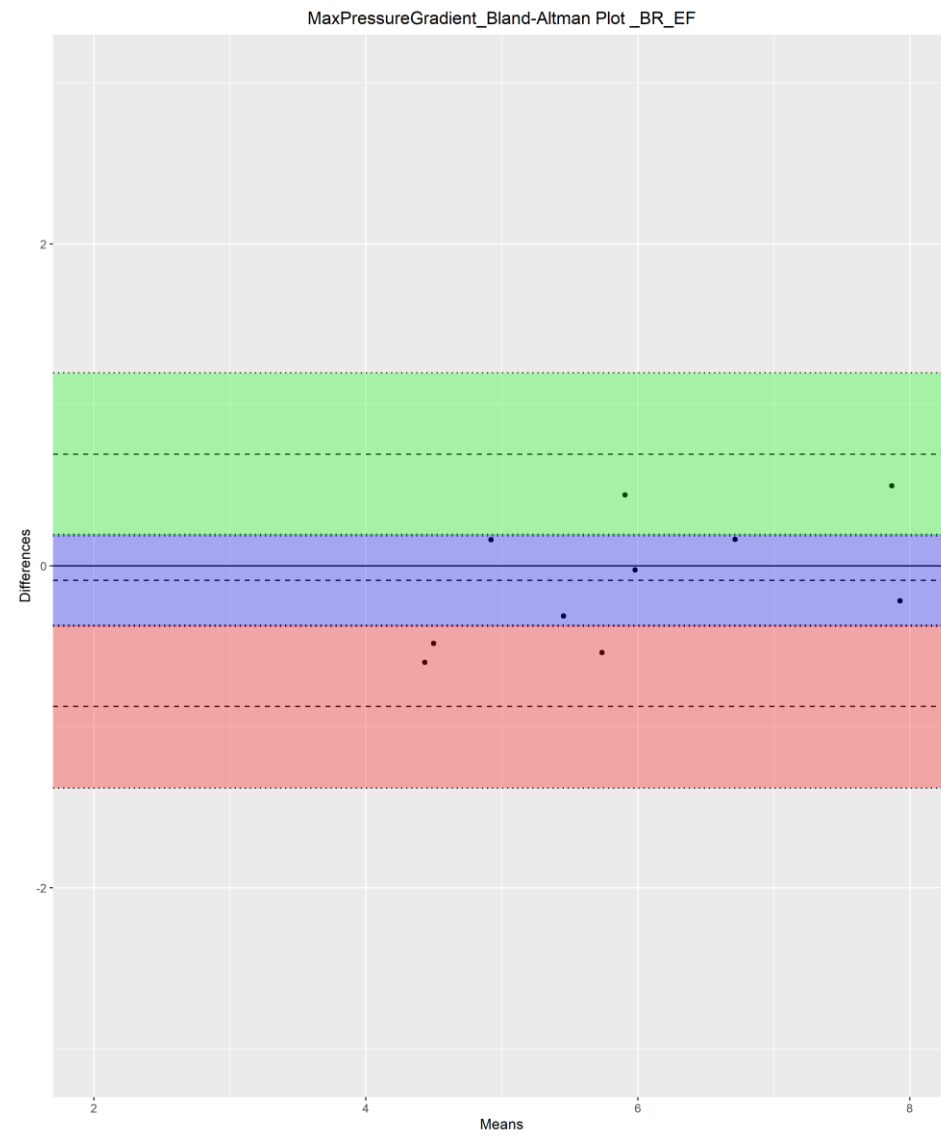

Phi3T

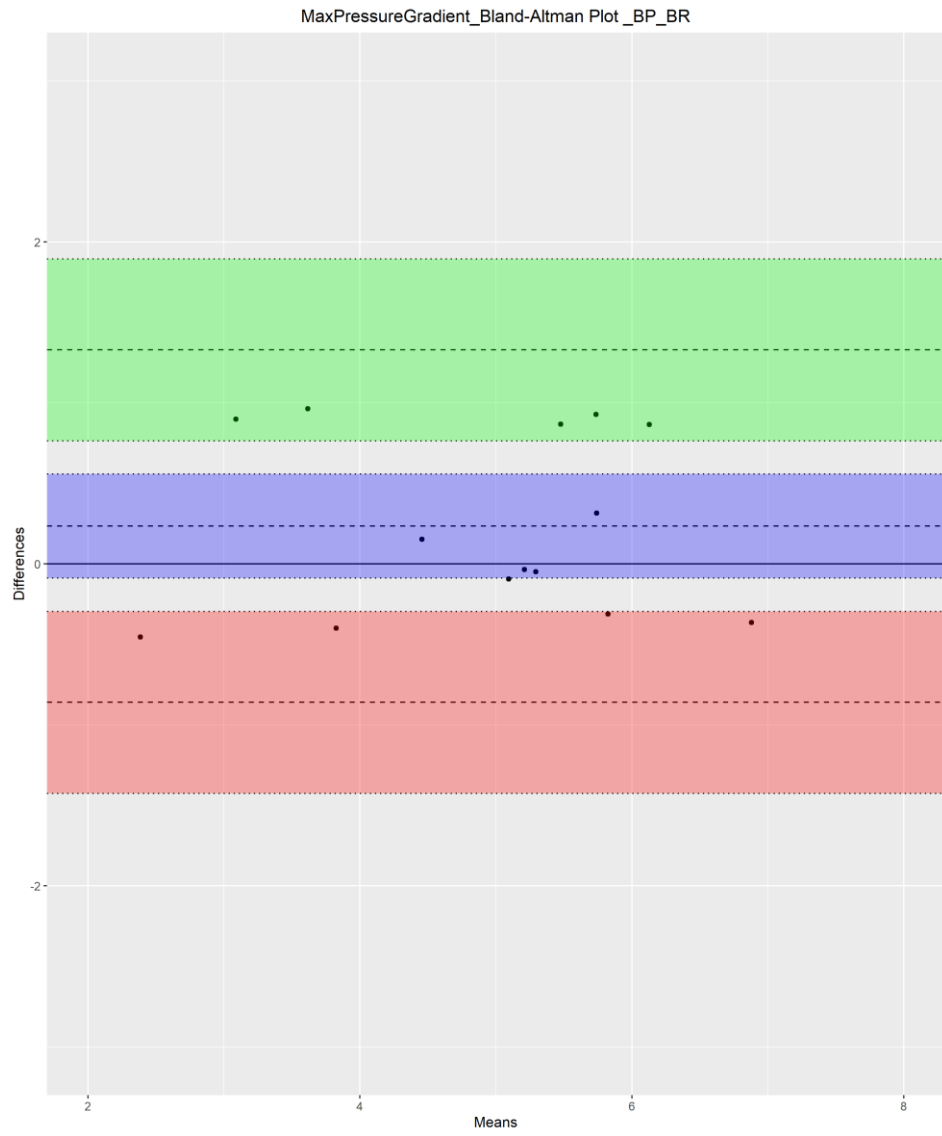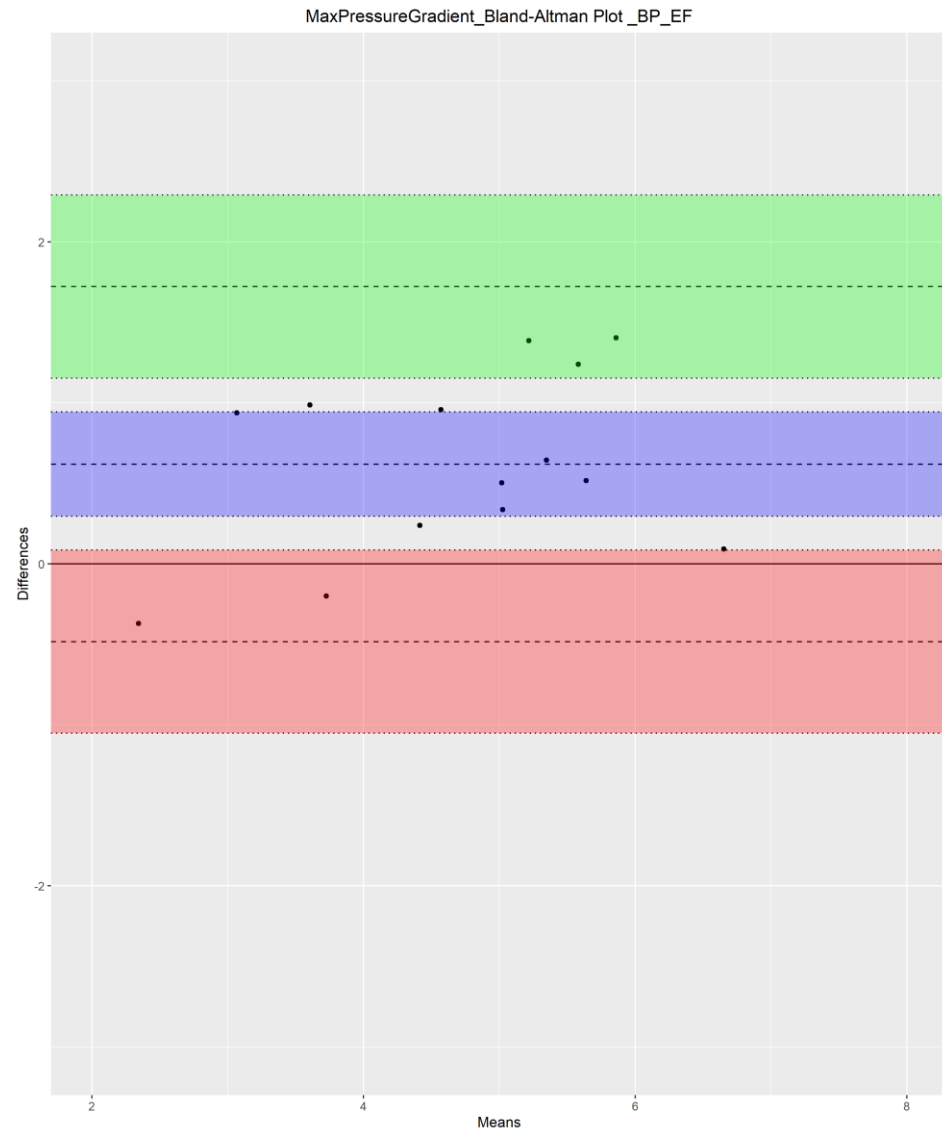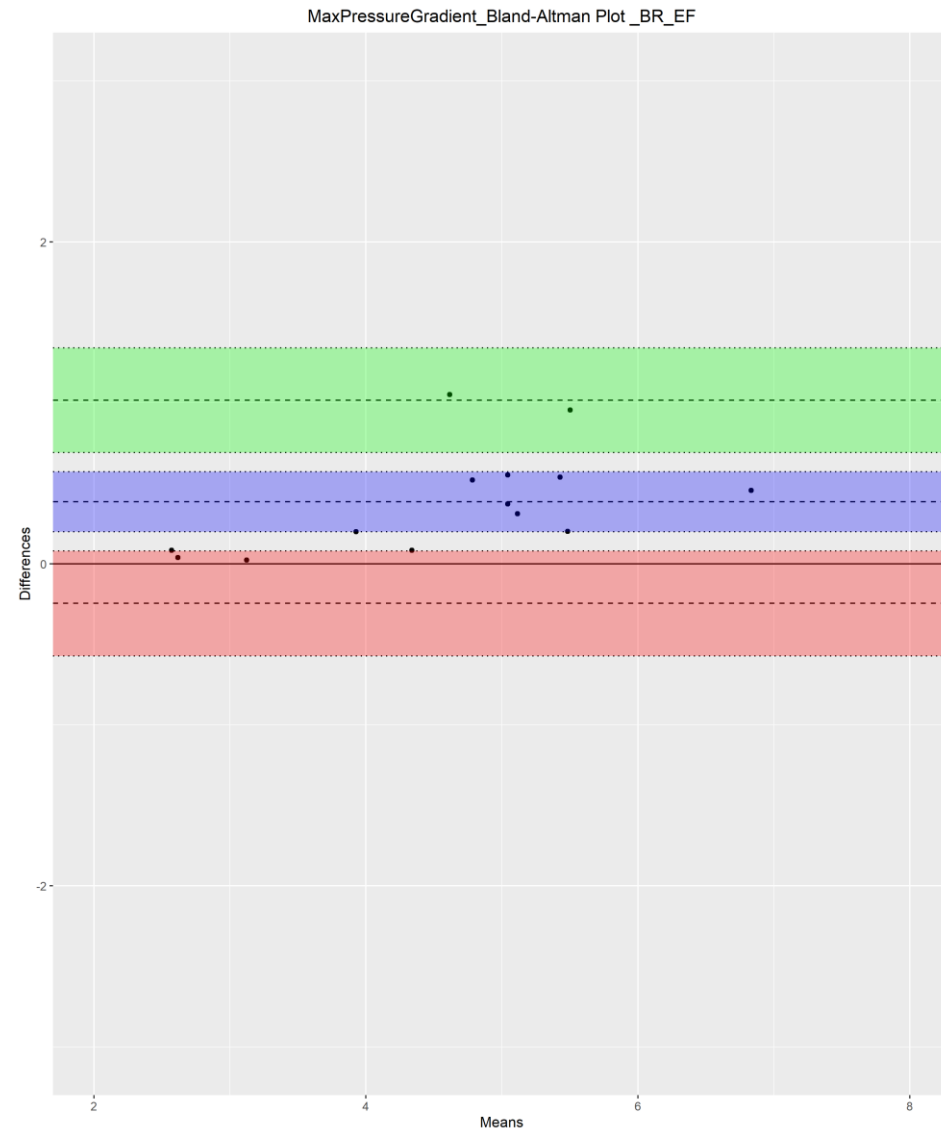

Siem3T

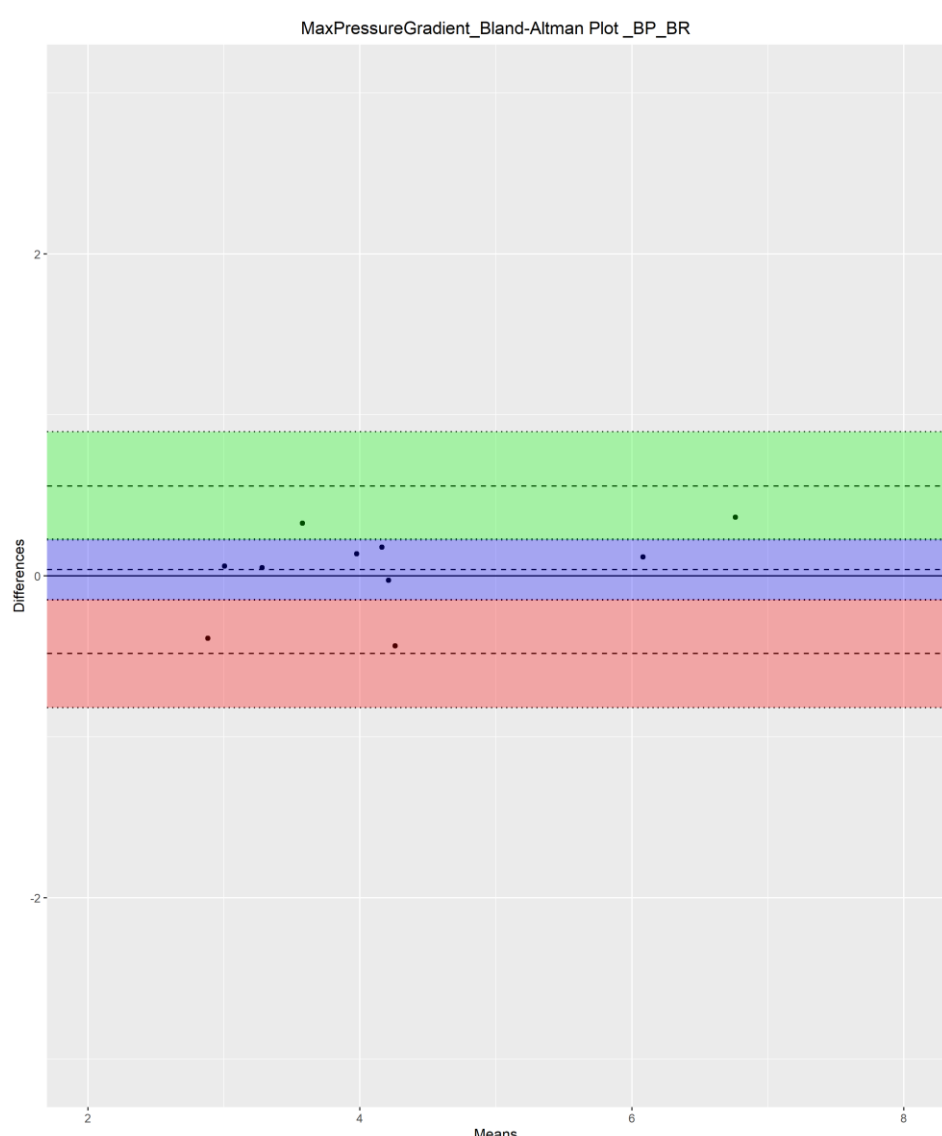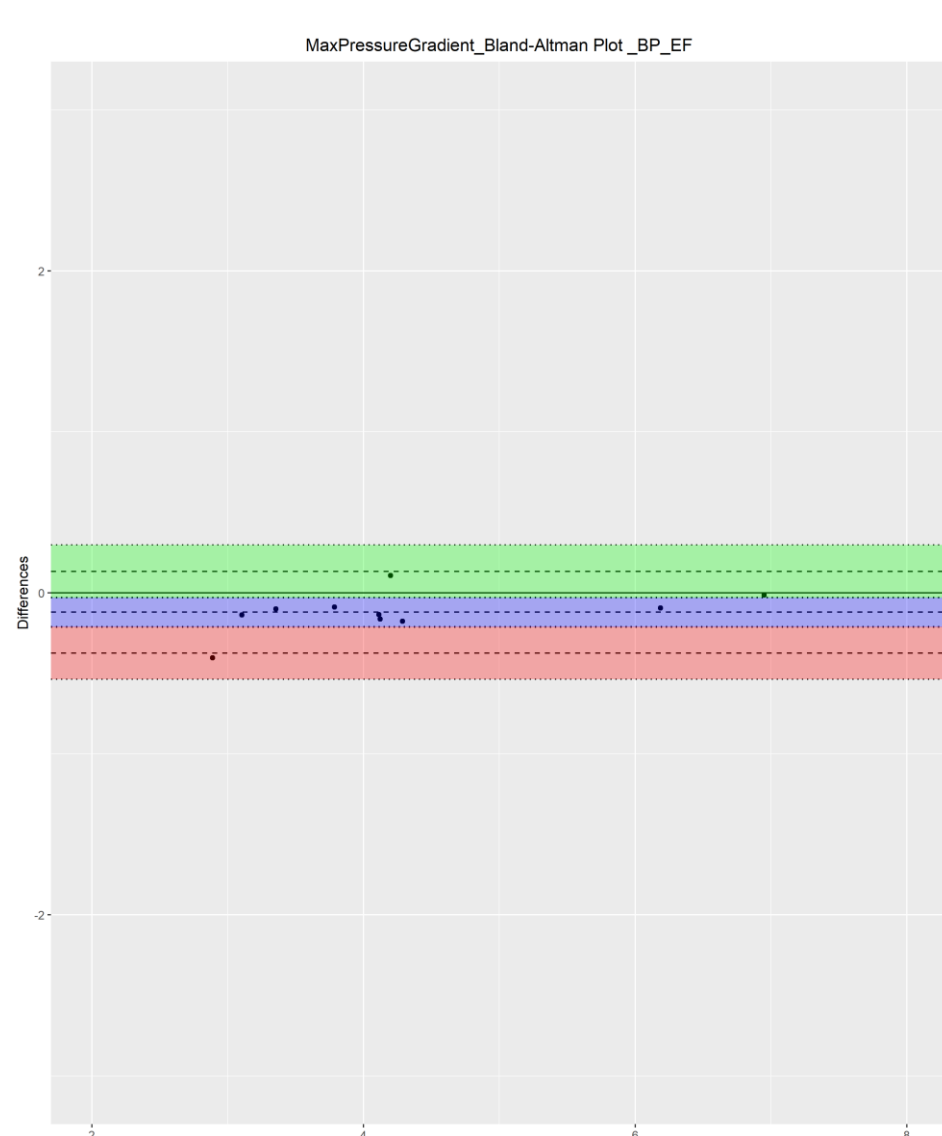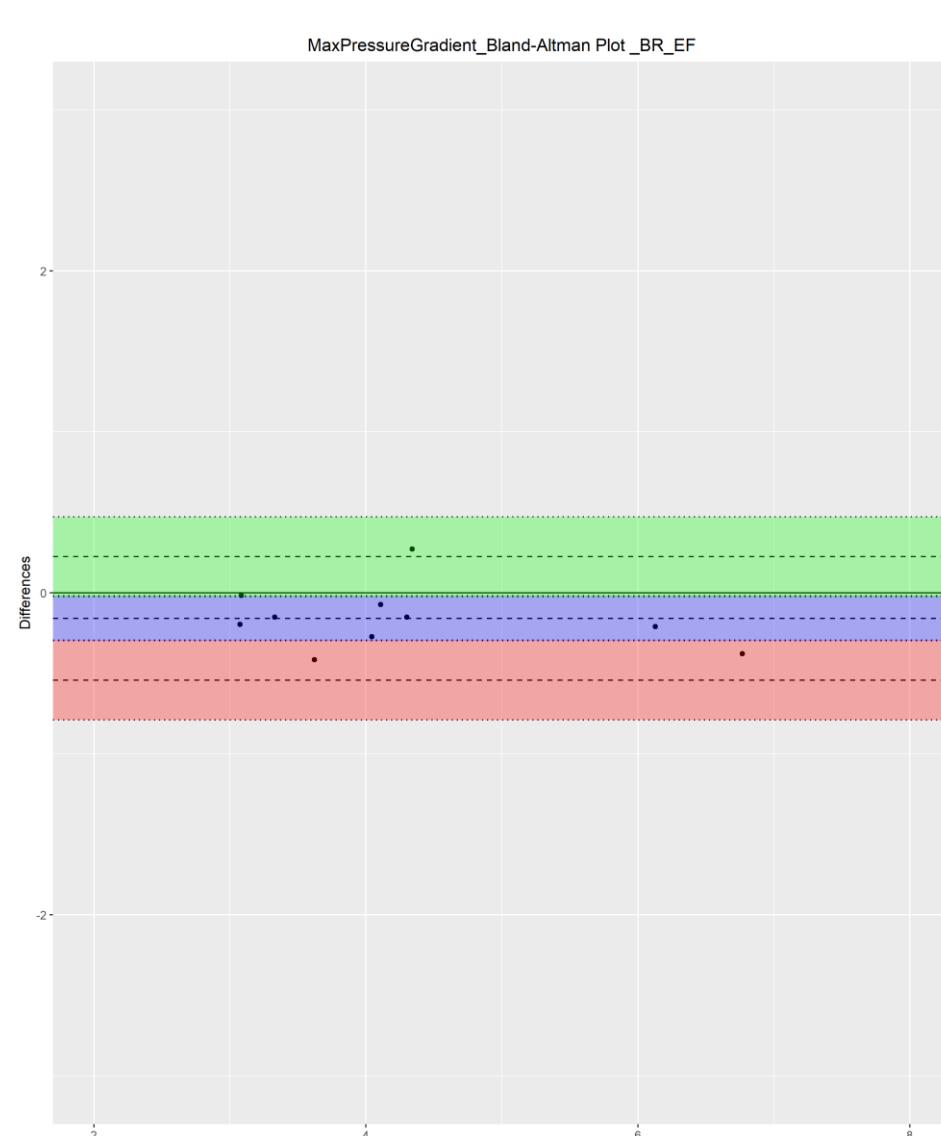



# MeanPressureGradient

Phi1.5T

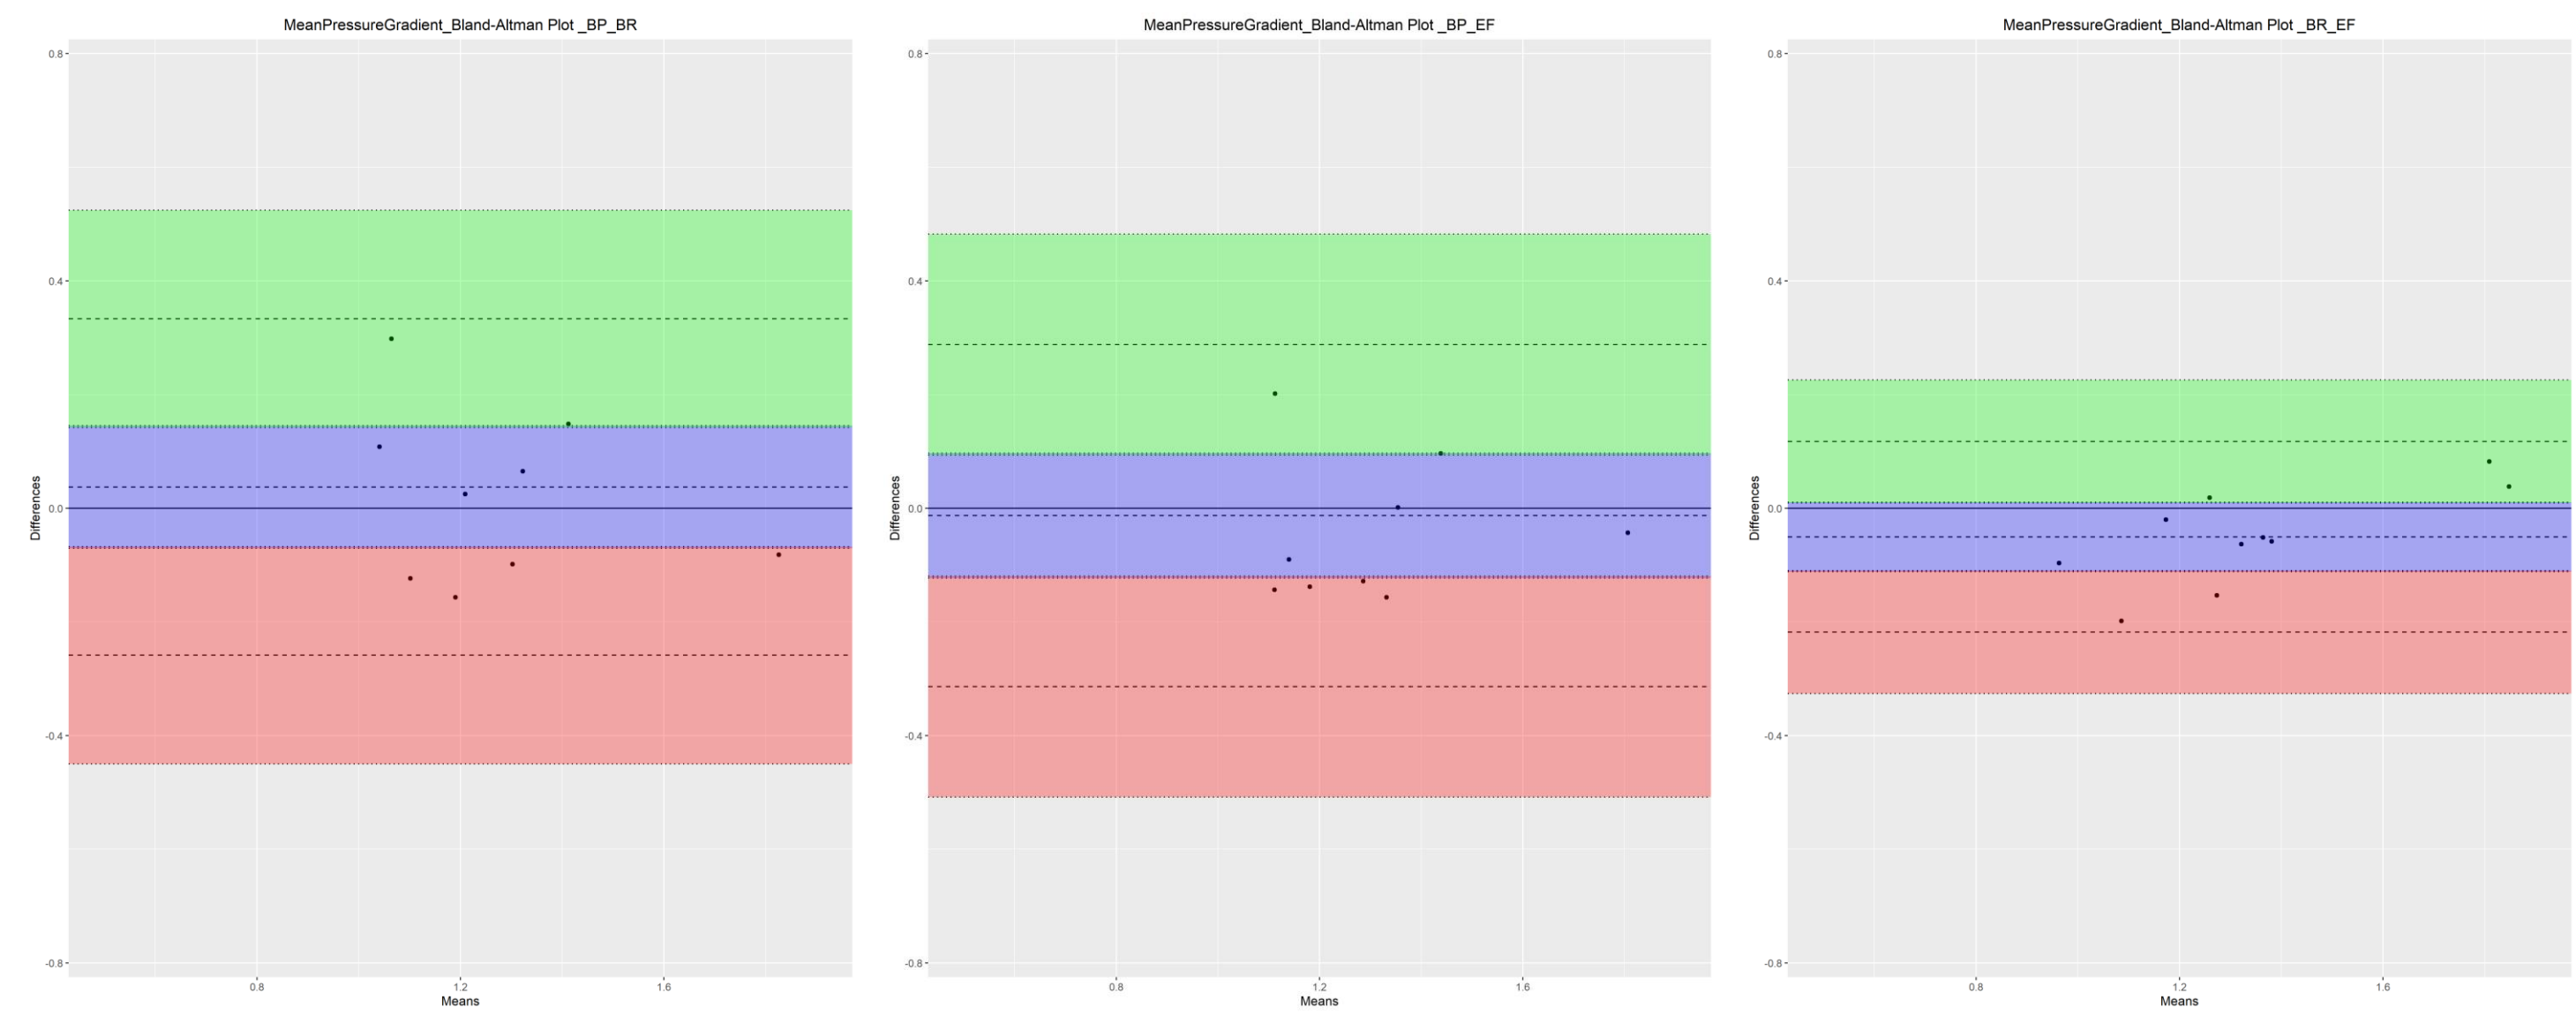

Phi3T

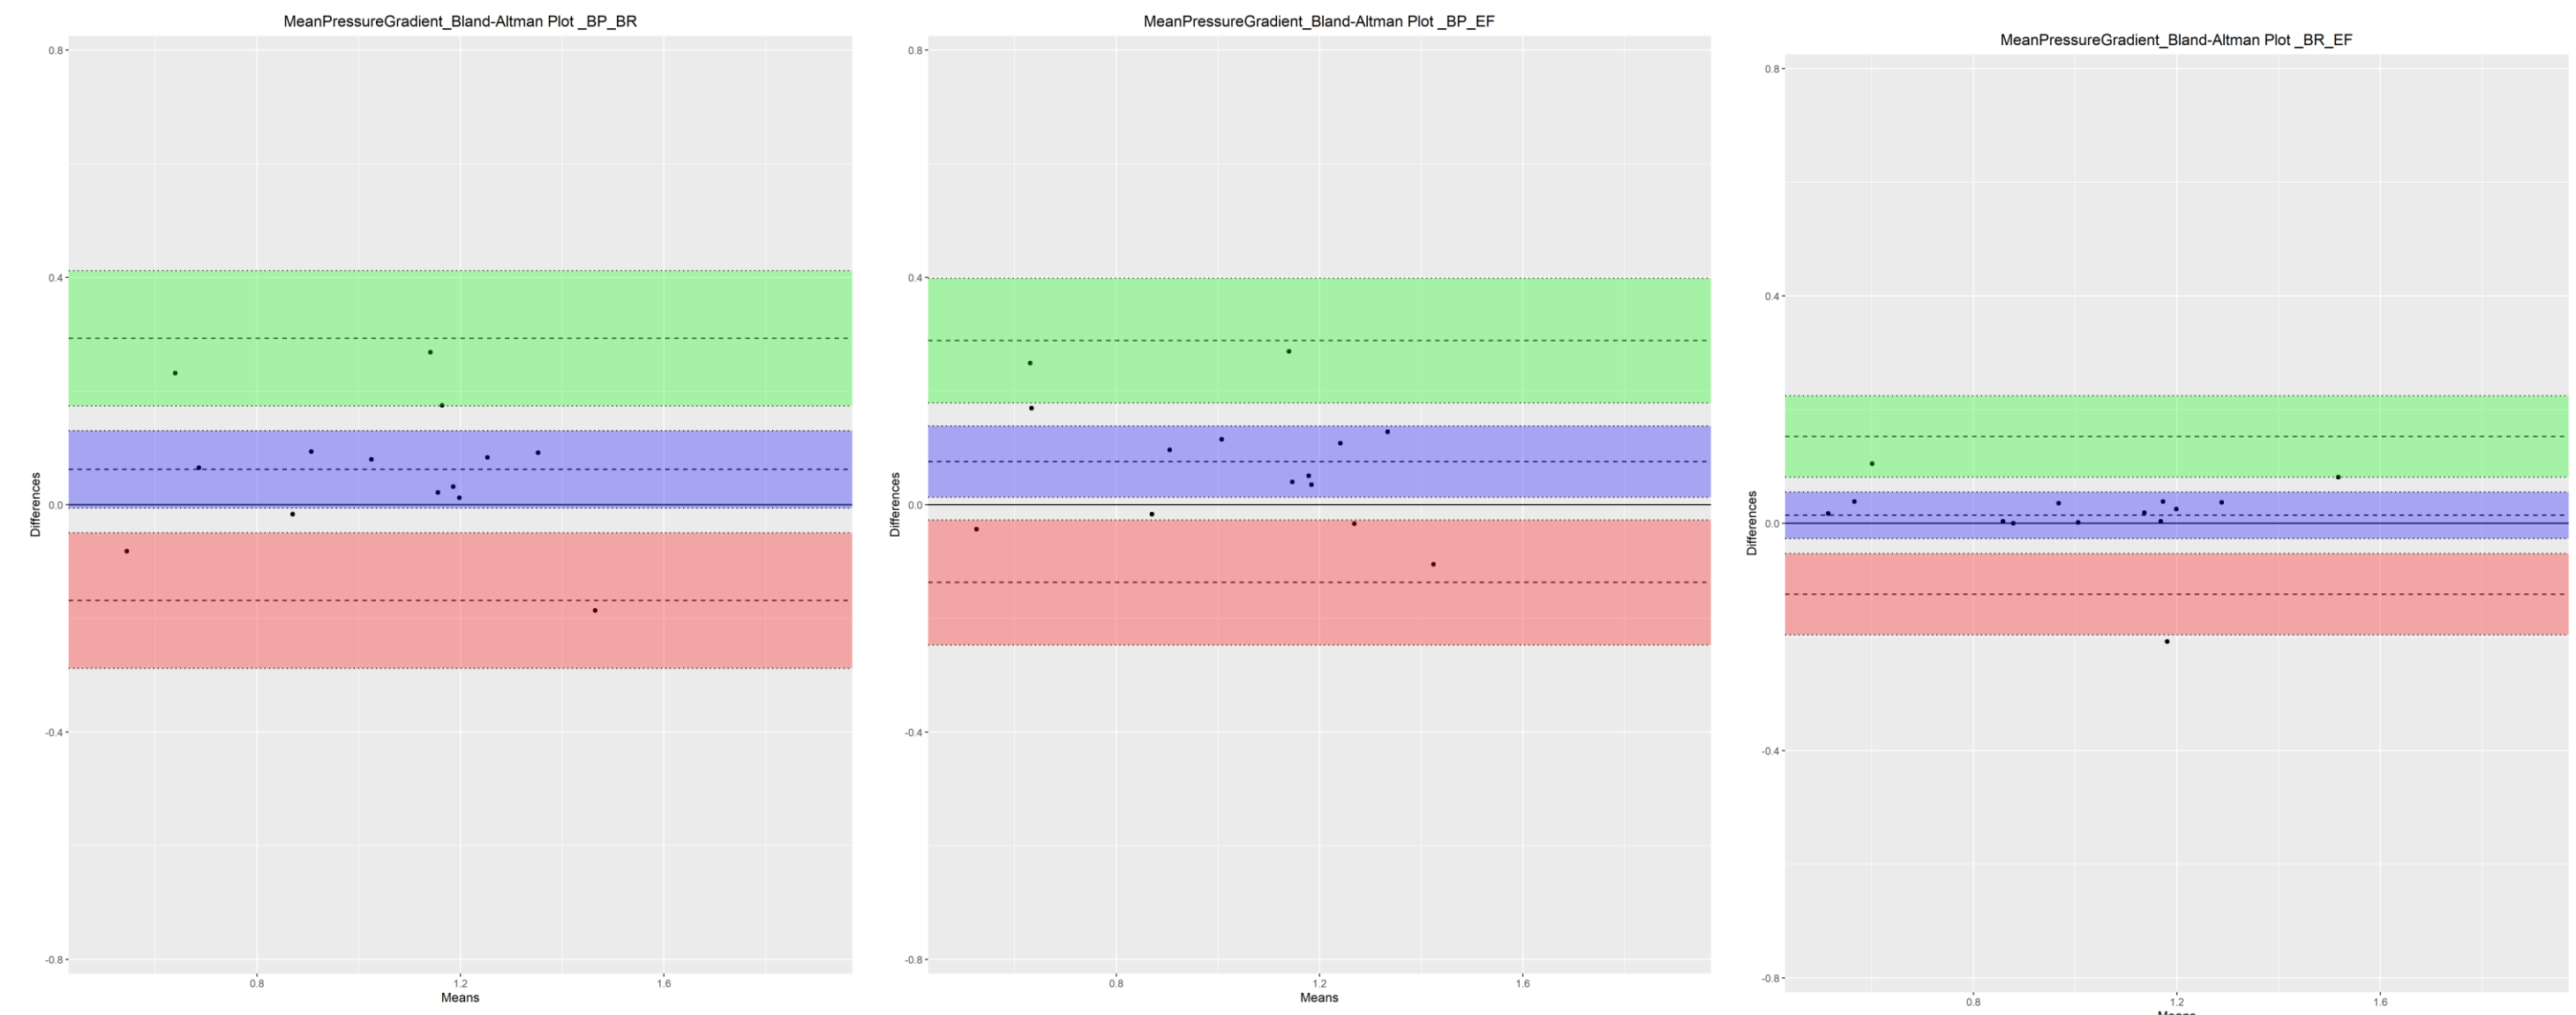

Siem3T

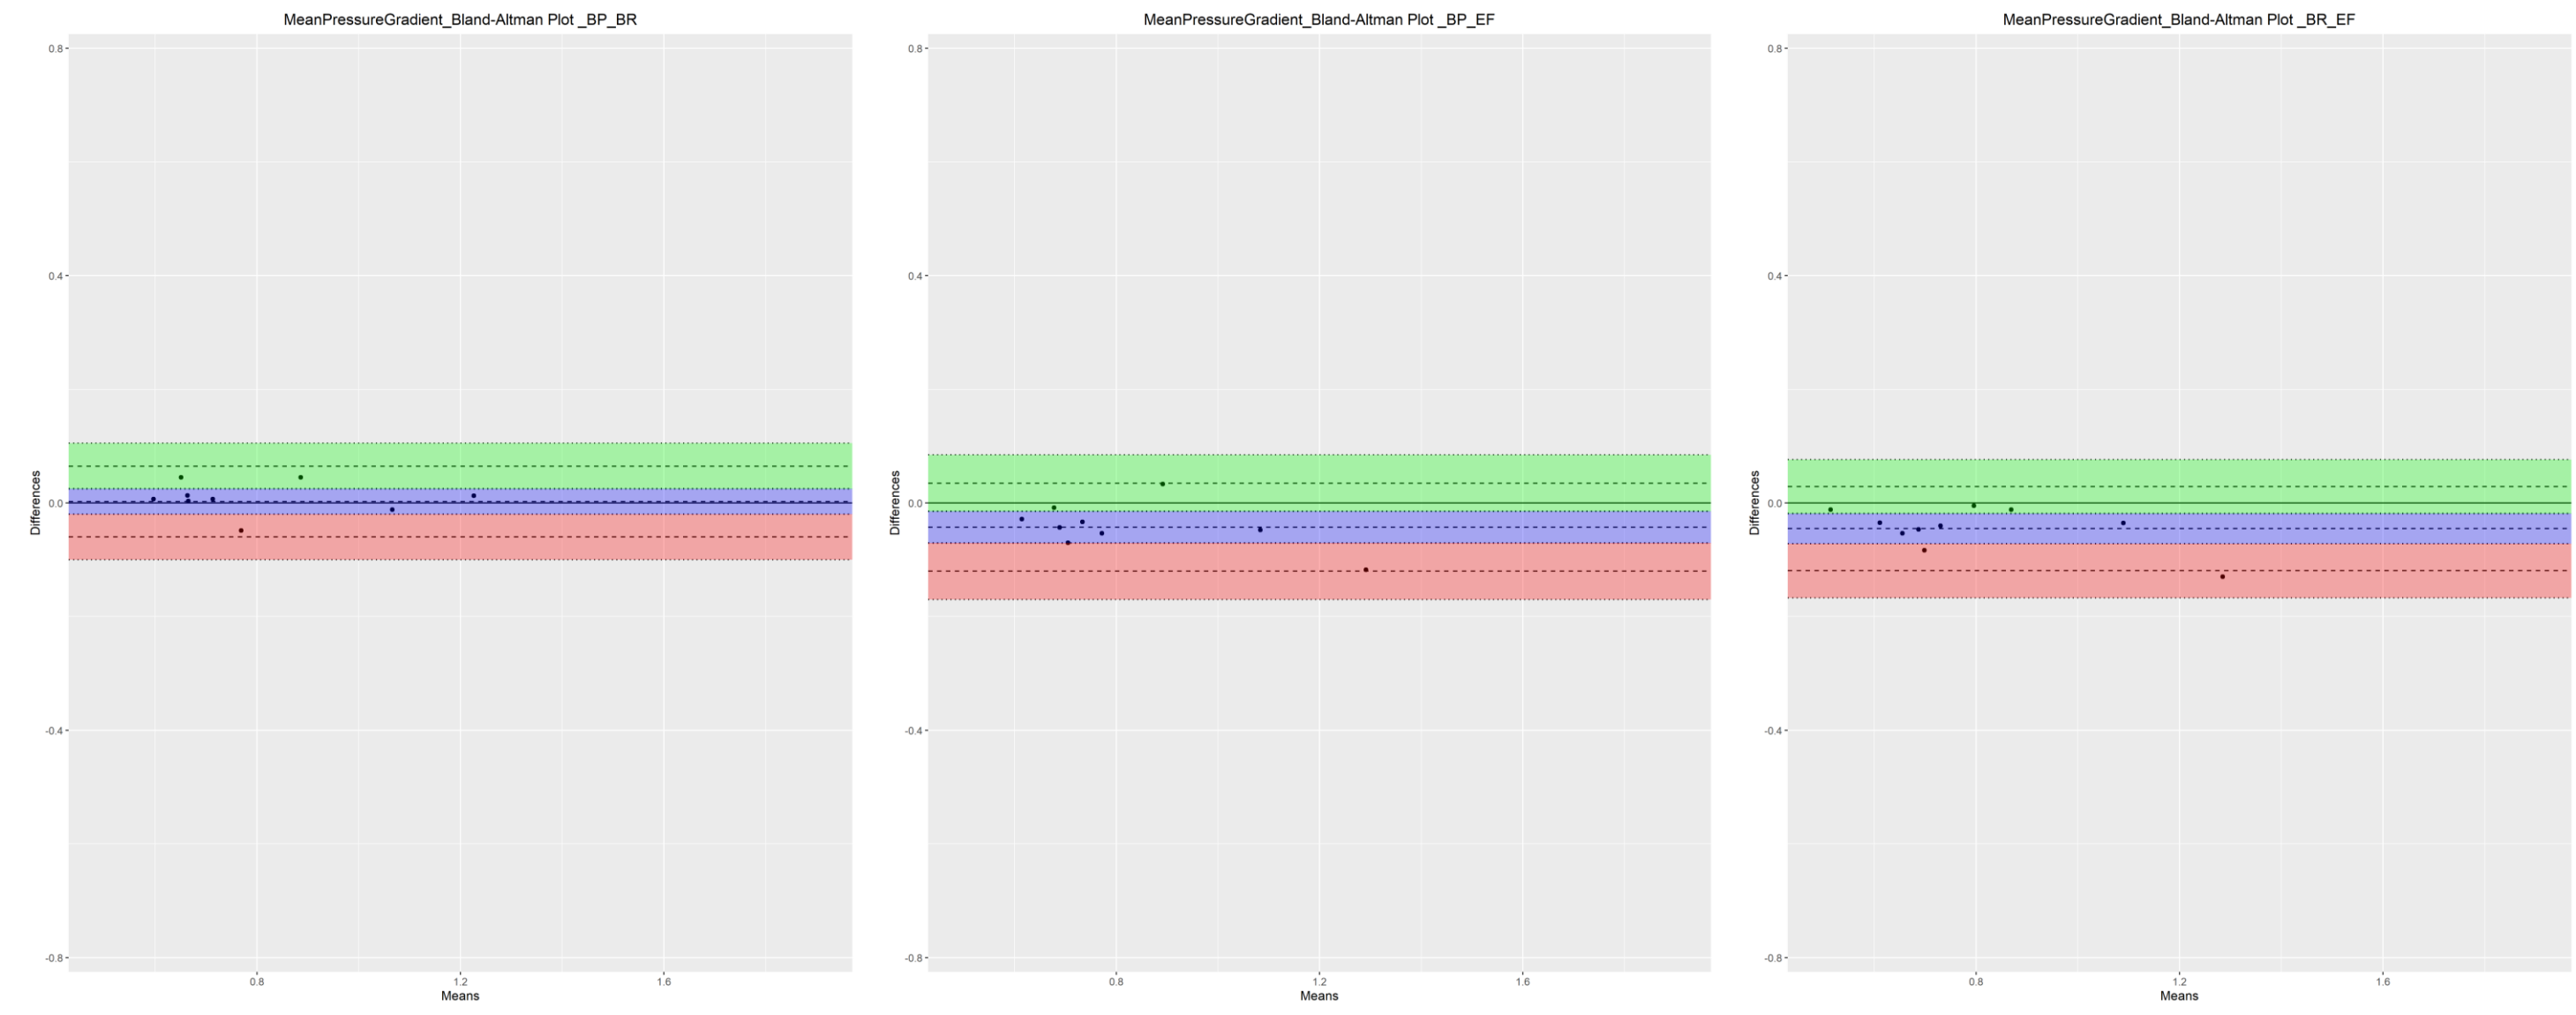

# TotalVolume

## Phi1.5T

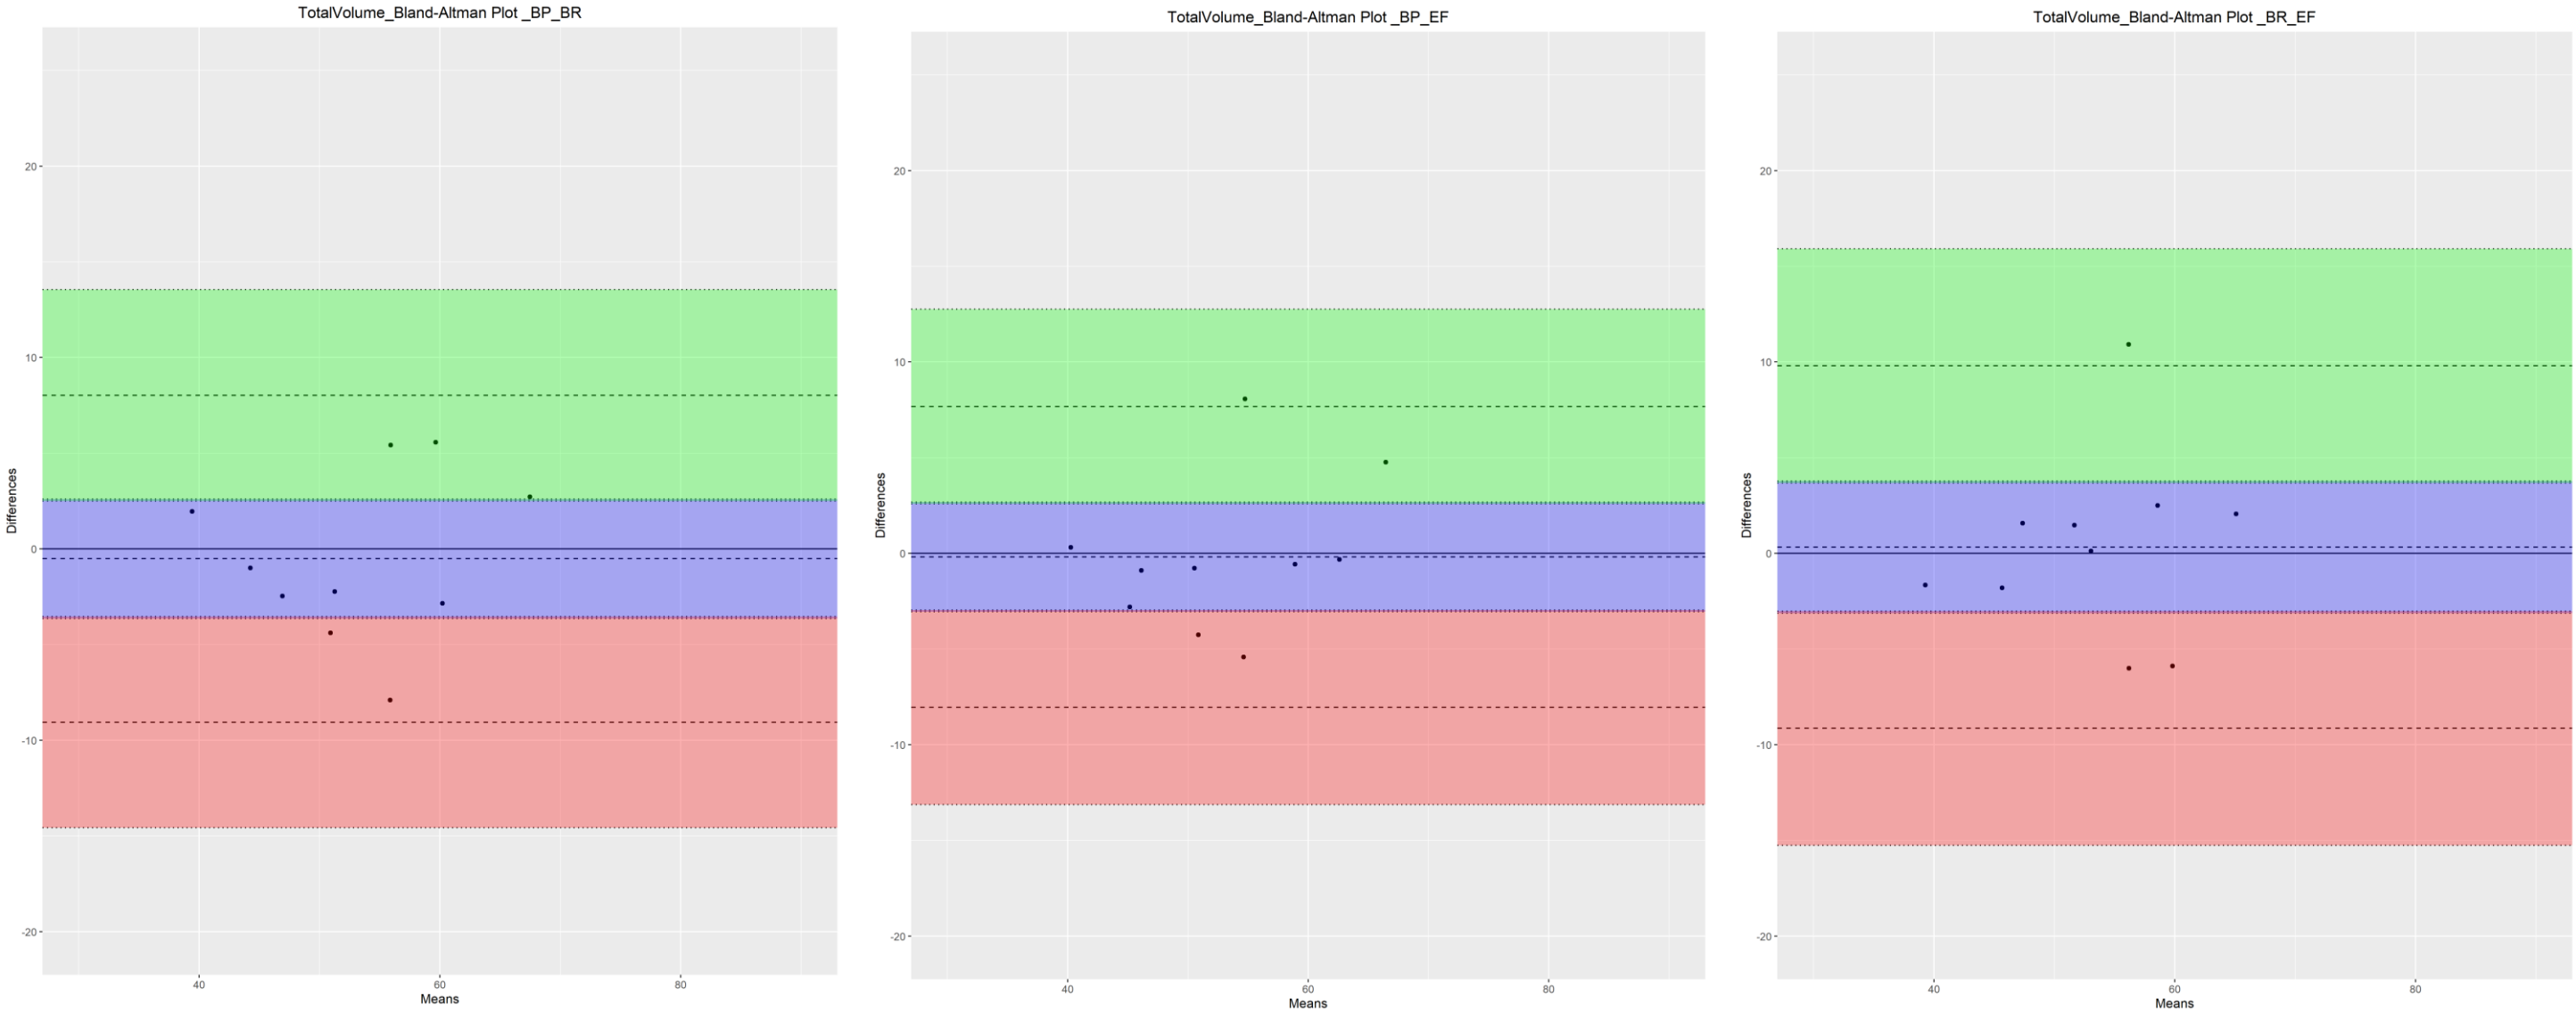

## Phi3T

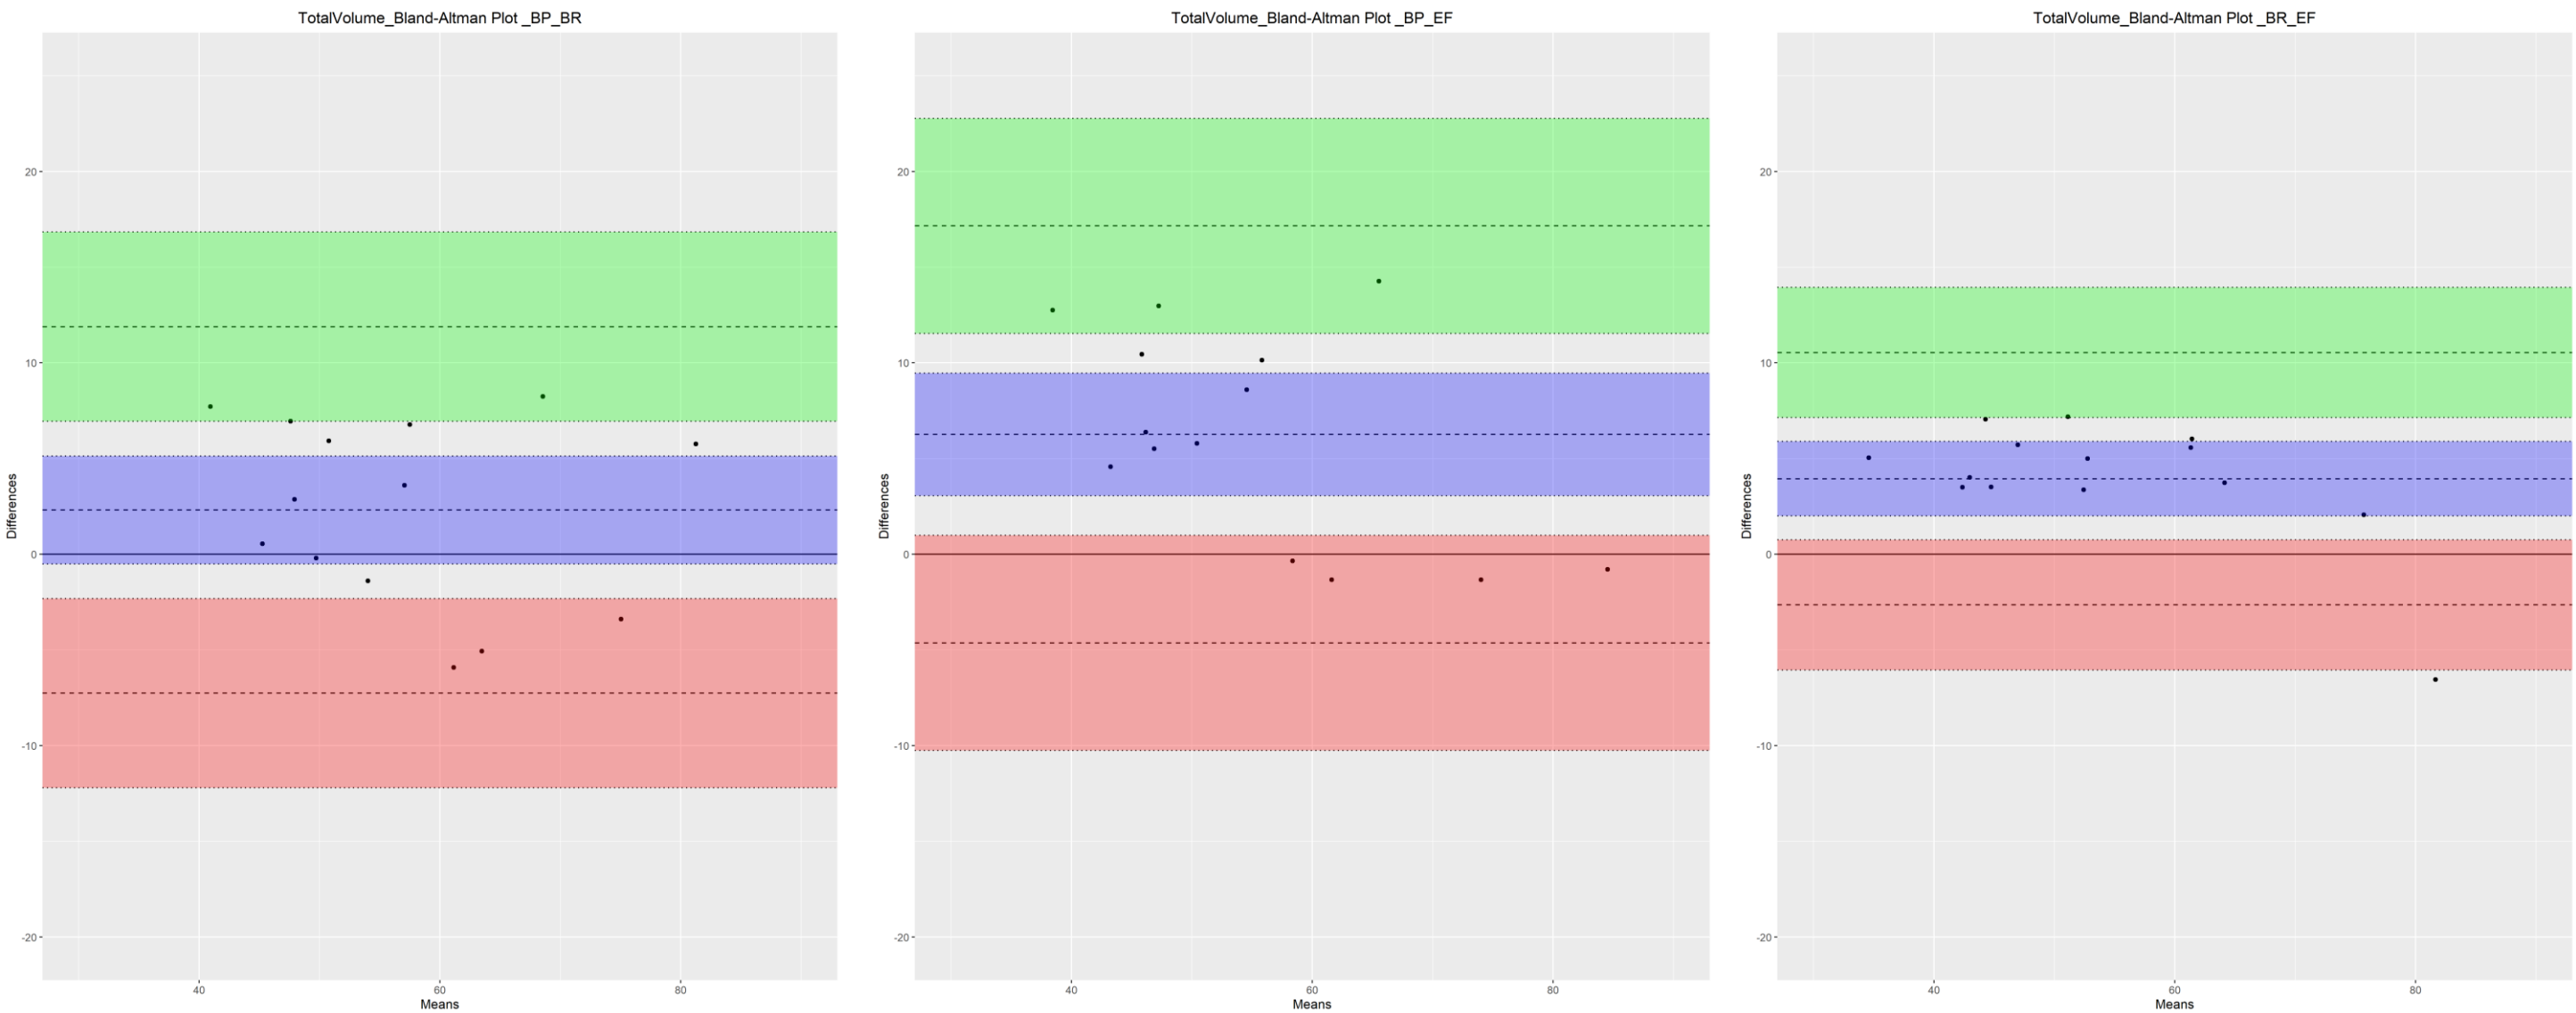

## Siem3T

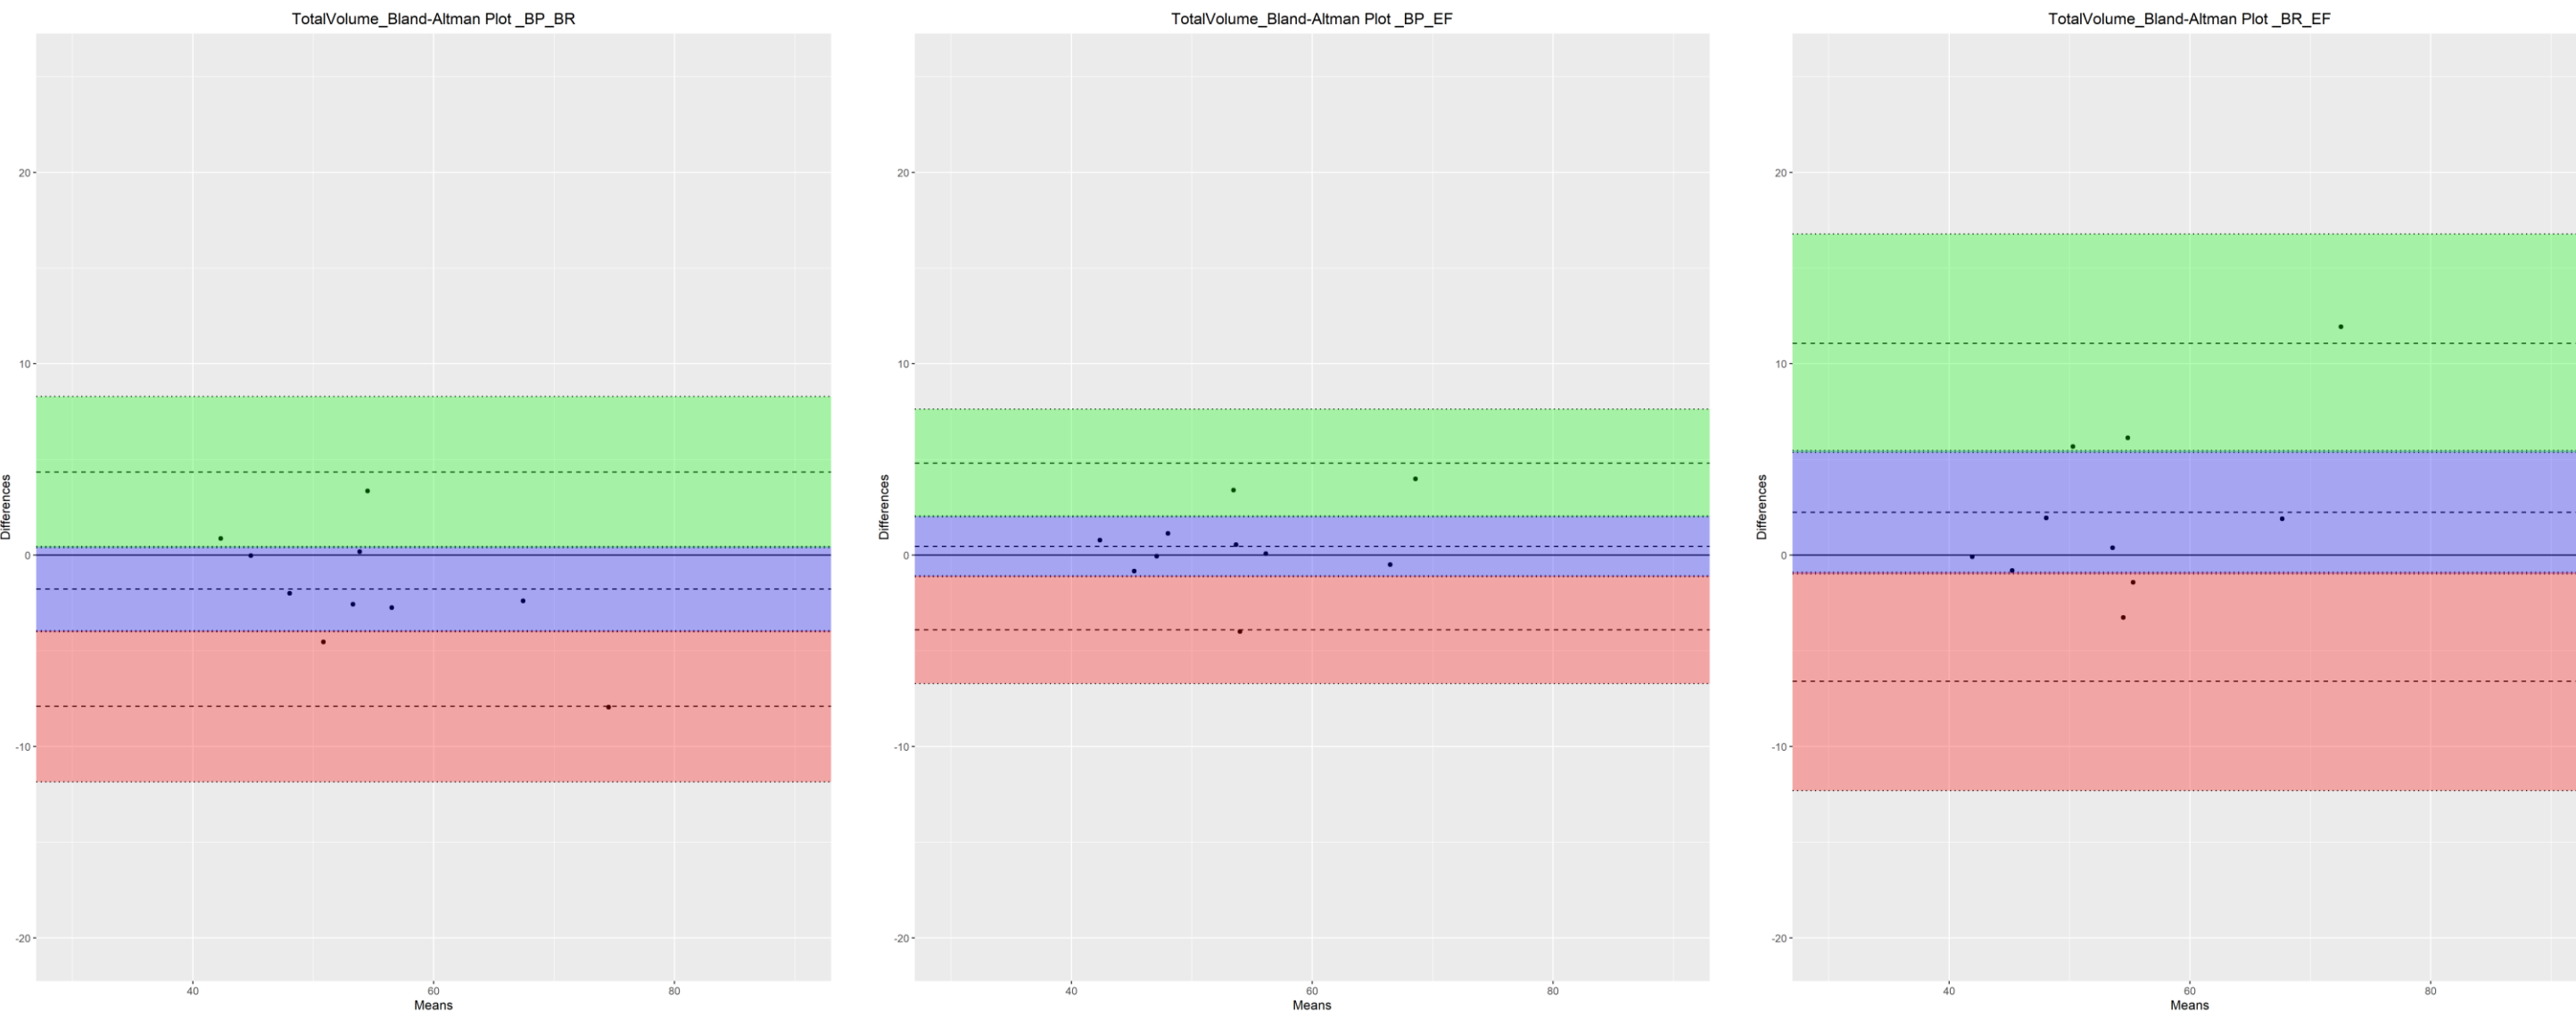

Supplement: s1 [file s1]
