# Supplementary material for: 4D-Flow Cardiovascular Magnetic Resonance Sequence for Aortic Assessment: Multi-Vendor and Multi-Magnetic Field Reproducibility in Healthy Volunteers
Source: MDPI journal article supplement (doi:10.3390/jcm12082960), 2023-04-19

## *Supplementary Material*

### **4D-flow Cardiovascular Magnetic Resonance sequence for aortic assessment: multi-vendor and multi-magnetic field reproducibility in healthy volunteers**

**Bruna Punzo<sup>1†</sup>, Brigida Ranieri<sup>1†</sup>, Liberatore<sup>1</sup>, Tramontano, Ornella Affinito<sup>1</sup>, Monica Franzese<sup>1</sup>, Eduardo Bossone<sup>2</sup>, Luca Saba<sup>3</sup>, Carlo Cavaliere<sup>1\*</sup>, Filippo Cademartiri<sup>4</sup>.**

**\* Correspondence:** carlo.cavaliere@synlab.it

#### **1 Supplementary Tables**

**Supplementary Table S1\_Population demographics and characteristics.**

| <b>Variables</b>      | <b>Mean ± SD<br/>(range)</b> | <b>Philips 1.5 T</b> | <b>Philips 3.0 T</b> | <b>Siemens 3.0 T</b> |
|-----------------------|------------------------------|----------------------|----------------------|----------------------|
| Gender (male/female)  | 6/9                          | -                    | -                    | -                    |
| Age (years)           | 33.71 ± 6.58                 | -                    | -                    | -                    |
| Height (cm)           | 171.07 ± 8.09                | -                    | -                    | -                    |
| Weight (Kg)           | 70.21 ± 14.40                | -                    | -                    | -                    |
| BMI                   | 23.76 ± 3.01                 | -                    | -                    | -                    |
| BSA (m <sup>2</sup> ) | 1.82 ± 0.22                  | -                    | -                    | -                    |
| Heart rate (bpm)      | 66.5 ± 6.12                  | 69.14±8.87           | 66.86±8.99           | 63.50±6.05           |
| Ejection fraction (%) | 62.8 ± 5.25                  | 62.93±4.55           | 62.87±5.24           | 62.61±6.14           |
| LV-EF (%)             | 63.87 ± 8.47                 | 69.06±5.65           | 65.25±6.64           | 60.01±8.36           |

|                                 |               |             |             |             |
|---------------------------------|---------------|-------------|-------------|-------------|
| RV-EF (%)                       | 54.75 ± 7.64  | 55.71±6.90  | 55.63±6.58  | 54.96±7.62  |
| LV-EDV/BSA (ml/m <sup>2</sup> ) | 75.94 ± 14.53 | 74.10±10.47 | 74.68±16.78 | 75.55±12.80 |
| LV-ESV/BSA (ml/m <sup>2</sup> ) | 27.85 ± 10.13 | 23.27±6.87  | 26.37±10.32 | 30.95±11.08 |
| LV-SV/BSA (ml/m <sup>2</sup> )  | 48.08 ± 9.49  | 50.83±5.25  | 48.30±9.93  | 44.60±5.15  |
| RV-EDV/BSA (ml/m <sup>2</sup> ) | 83.24 ± 22.41 | 76.62±13.55 | 83.40±18.08 | 80.09±17.11 |
| RV-ESV/BSA (ml/m <sup>2</sup> ) | 38.54 ± 14.22 | 33.88±7.57  | 37.56±11.84 | 36.77±12.09 |
| RV-SV/BSA (ml/m <sup>2</sup> )  | 44.34 ± 9.75  | 42.74±9.84  | 45.83±8.41  | 43.02±7.24  |
| LV Mass (g/m <sup>2</sup> )     | 55.89 ± 9.08  | 56.38±8.02  | 56.64±9.55  | 53.85±8.66  |

*BMI, Body Mass Index; BSA, Body Surface Area; LV-EF, Left Ventricle Ejection Fraction; RV-EF, Right Ventricle Ejection Fraction; LV-EDV, Left Ventricle Endo Diastolic Volume; LV-ESV, Left Ventricle Endo Systolic Volume; LV-SV, Left Ventricle Stoke Volume; RV-EDV, Right Ventricle Endo Diastolic Volume; RV-ESV, Right Ventricle Endo Systolic Volume; RV-SV, Right Ventricle Stoke Volume; LV Mass, Left Ventricle Mass.*

Supplementary Table S2\_Inter-variabilityPhilips 3T.

| Philips 3T<br>device   | ROI 1      |      |       | ROI 2      |      |       | ROI 3      |      |       | ROI 4      |      |       | ROI 5      |      |       | ROI 6      |      |       |
|------------------------|------------|------|-------|------------|------|-------|------------|------|-------|------------|------|-------|------------|------|-------|------------|------|-------|
| 4DFlow pa-<br>rameters | mean±sd    | CV   | 95%CI |
| OPERATOR 1             |            |      |       |            |      |       |            |      |       |            |      |       |            |      |       |            |      |       |
| AxialWSS               | 0,14±0,01  | 10,6 | 0,01  | 0,15±0,02  | 15,1 | 0,01  | 0,15±0,03  | 17,4 | 0,02  | 0,17±0,04  | 23   | 0,02  | 0,21±0,06  | 28,2 | 0,03  | 0,20±0,05  | 24,7 | 0,03  |
| CircWSS                | 0,08±0,01  | 16,5 | 0,01  | 0,07±0,01  | 19,5 | 0,01  | 0,06±0,01  | 10,1 | 0,004 | 0,09±0,02  | 19,1 | 0,01  | 0,10±0,02  | 15,4 | 0,01  | 0,08±0,04  | 12,6 | 0,01  |
| Flow                   | 111,7±15,4 | 13,8 | 8,9   | 101,4±17,6 | 17,4 | 10,2  | 116,1±21,3 | 18,3 | 12,3  | 121,2±20,4 | 16,6 | 11,6  | 135,4±15,9 | 11,7 | 10,1  | 130,3±15,4 | 11,9 | 9,3   |
| OPERATOR 2             |            |      |       |            |      |       |            |      |       |            |      |       |            |      |       |            |      |       |
| AxialWSS               | 0,14±0,02  | 18,3 | 0,01  | 0,14±0,03  | 23,3 | 0,02  | 0,15±0,03  | 21,1 | 0,02  | 0,17±0,02  | 13,6 | 0,01  | 0,20±0,05  | 24,9 | 0,03  | 0,23±0,04  | 19,6 | 0,03  |

|                   |            |      |      |            |      |      |            |      |       |            |       |      |           |      |      |            |      |      |
|-------------------|------------|------|------|------------|------|------|------------|------|-------|------------|-------|------|-----------|------|------|------------|------|------|
| <i>CircWSS</i>    | 0,07±0,01  | 18   | 0,01 | 0,06±0,01  | 18   | 0,01 | 0,08±0,01  | 16,4 | 0,01  | 0,09±0,02  | 20, 0 | 0,01 | 0,1±0,02  | 21,9 | 0,01 | 0,09±0,02  | 18,5 | 0,01 |
| <i>Flow</i>       | 106,7±19,7 | 18,4 | 11,4 | 112,9±23,0 | 20,4 | 13,3 | 108,2±12,0 | 11,1 | 7,3   | 118±18,1   | 12,0  | 8,2  | 137,3±5,7 | 4,2  | 3,6  | 123,0±14,1 | 11,5 | 8,2  |
| <b>OPERATOR 3</b> |            |      |      |            |      |      |            |      |       |            |       |      |           |      |      |            |      |      |
| <i>AxialWSS</i>   | 0,14±0,02  | 11,9 | 0,01 | 0,15±0,02  | 16,0 | 0,01 | 0,14±0,03  | 24,2 | 0,02  | 0,17±0,03  | 16,2  | 0,02 | 0,20±0,05 | 24,0 | 0,03 | 0,22±0,04  | 16,5 | 0,02 |
| <i>CircWSS</i>    | 0,07±0,01  | 13,3 | 0,01 | 0,06±0,01  | 16,4 | 0,01 | 0,07±0,005 | 7,01 | 0,003 | 0,09±0,02  | 16,6  | 0,01 | 0,10±0,01 | 12,9 | 0,01 | 0,08±0,01  | 13,0 | 0,01 |
| <i>Flow</i>       | 109,2±16,1 | 14,7 | 9,3  | 107,2±18,3 | 17,1 | 10,6 | 114,4±18,9 | 16,5 | 11    | 119,6±15,5 | 12,9  | 8,9  | 136,4±9,1 | 6,7  | 5,8  | 124,6±16,1 | 12,9 | 9,3  |

Supplementary Table S3\_Inter-variabilitySiemens 3T.

| Siemens<br>3T device   | ROI 1      |            |       | ROI 2   |           |       | ROI 3   |           |       | ROI 4   |           |       | ROI 5   |            |       | ROI 6   |            |       |       |
|------------------------|------------|------------|-------|---------|-----------|-------|---------|-----------|-------|---------|-----------|-------|---------|------------|-------|---------|------------|-------|-------|
| 4DFlow pa-<br>rameters | mean±sd    | CV         | 95%CI | mean±sd | CV        | 95%CI | mean±sd | CV        | 95%CI | mean±sd | CV        | 95%CI | mean±sd | CV         | 95%CI | mean±sd | CV         | 95%CI |       |
|                        | OPERATOR 1 |            |       |         |           |       |         |           |       |         |           |       |         |            |       |         |            |       |       |
|                        | AxialWSS   | 0,11±0,02  | 18,5  | 0,02    | 0,10±0,02 | 18,1  | 0,01    | 0,09±0,02 | 18,1  | 0,01    | 0,11±0,02 | 18,9  | 0,01    | 0,13±0,03  | 22,8  | 0,02    | 0,13±0,04  | 27,2  | 0,02  |
|                        | CircWSS    | 0,04±0,01  | 22,0  | 0,01    | 0,05±0,01 | 26,9  | 0,01    | 0,04±0,01 | 28,8  | 0,01    | 0,04±0,01 | 21,2  | 0,004   | 0,05±0,01  | 28,7  | 0,01    | 0,04±0,01  | 23,8  | 0,005 |
|                        | Flow       | 110,9±18,4 | 16,6  | 11,1    | 96,3±16,3 | 17,0  | 9,4     | 90,3±15,6 | 17,2  | 9,0     | 108,6±16  | 14,8  | 9,2     | 104,4±17,4 | 16,7  | 10,1    | 101,6±19,5 | 19,2  | 11,2  |
|                        | OPERATOR 2 |            |       |         |           |       |         |           |       |         |           |       |         |            |       |         |            |       |       |
|                        | AxialWSS   | 0,09±0,04  | 45,6  | 0,02    | 0,09±0,02 | 23,8  | 0,01    | 0,09±0,02 | 22,9  | 0,01    | 0,12±0,01 | 10,2  | 0,01    | 0,14±0,02  | 12,2  | 0,01    | 0,14±0,03  | 18,6  | 0,02  |
|                        | CircWSS    | 0,05±0,01  | 27,2  | 0,01    | 0,04±0,01 | 28,1  | 0,01    | 0,04±0,01 | 29,4  | 0,01    | 0,04±0,01 | 20,0  | 0,004   | 0,04±0     | 0     | 0       | 0,04±0,01  | 22,2  | 0,005 |
|                        | Flow       | 107,0±21,0 | 19,5  | 12,1    | 89,4±17,0 | 19,1  | 10,3    | 90,9±16,0 | 17,6  | 9,3     | 109±18,0  | 16,4  | 10,3    | 104,5±17   | 16,2  | 9,8     | 100,6±18,1 | 18,0  | 10,5  |

*Flow*

**OPERATOR 3**

*AxialWSS*

0,11±0,03   29,3   0,02   0,09±0,02   20,9   0,01   0,09±0,02   22,5   0,01   0,12±0,02   18,2   0,01   0,13±0,03   22,4   0,02   0,13±0,03   25,5   0,02

*CircWSS*

0,04±0,02   35,4   0,01   0,05±0,01   20,4   0,01   0,04±0,01   28,2   0,01   0,04±0,005   12,9   0,003   0,05±0,02   33,4   0,01   0,03±0,01   25,7   0,005

*Flow*

115,6±19,1   16,5   11,0   97,3±18,7   19,2   10,8   90,2±14,9   16,5   8,6   108,0±17,3   16,0   10,0   104,2±17,0   16,3   9,8   103,8±20,0   19,3   11,6

Supplementary Table S4\_Inter-variabilityPhilips 1.5T.

| Philips<br>1.5T device | ROI 1      |      |            | ROI 2      |      |       | ROI 3      |      |       | ROI 4      |      |       | ROI 5     |      |       | ROI 6     |      |            |
|------------------------|------------|------|------------|------------|------|-------|------------|------|-------|------------|------|-------|-----------|------|-------|-----------|------|------------|
| 4DFlow pa-<br>rameters | mean±sd    | CV   | 95%CI<br>I | mean±sd    | CV   | 95%CI | mean±sd    | CV   | 95%CI | mean±sd    | CV   | 95%CI | mean±sd   | CV   | 95%CI | mean±sd   | CV   | 95%CI<br>I |
| OPERATOR 1             |            |      |            |            |      |       |            |      |       |            |      |       |           |      |       |           |      |            |
| AxialWSS               | 0,14±0,02  | 12,6 | 0,01       | 0,15±0,03  | 18,8 | 0,02  | 0,17±0,05  | 28,5 | 0,03  | 0,19±0,04  | 19   | 0,02  | 0,22±0,04 | 18,3 | 0,02  | 0,25±0,05 | 21,9 | 0,03       |
| CircWSS                | 0,10±0,03  | 29   | 0,02       | 0,09±0,04  | 41,8 | 0,02  | 0,10±0,05  | 50,4 | 0,03  | 0,10±0,03  | 31,6 | 0,02  | 0,12±0,03 | 26,2 | 0,02  | 0,11±0,04 | 32,8 | 0,02       |
| Flow                   | 129,4±18,5 | 14,3 | 10,7       | 115,6±24,3 | 21,1 | 14,0  | 110,8±32,5 | 29,3 | 18,7  | 124,8±20,4 | 21,1 | 11,7  | 128±18,1  | 14,2 | 10,5  | 126,5±18  | 14,2 | 10,4       |
| OPERATOR 2             |            |      |            |            |      |       |            |      |       |            |      |       |           |      |       |           |      |            |
| AxialWSS               | 0,14±0,03  | 23,7 | 0,02       | 0,15±0,02  | 16,1 | 0,01  | 0,16±0,04  | 23,5 | 0,02  | 0,18±0,03  | 19,3 | 0,02  | 0,22±0,06 | 27,4 | 0,04  | 0,24±0,06 | 26,3 | 0,04       |
|                        | 0,09±0,03  | 28   | 0,01       | 0,08±0,03  | 37,8 | 0,02  | 0,09±0,03  | 30   | 0,02  | 0,10±0,02  | 24,3 | 0,01  | 0,11±0,03 | 30   | 0,02  | 0,11±0,03 | 30,2 | 0,02       |

|                   |            |      |      |            |      |      |            |      |      |            |      |      |            |      |      |            |      |      |
|-------------------|------------|------|------|------------|------|------|------------|------|------|------------|------|------|------------|------|------|------------|------|------|
| <i>CircWSS</i>    | 125,8±23,0 | 18,3 | 13,3 | 114,2±22,8 | 19,6 | 13,2 | 110,1±22,2 | 20,2 | 12,8 | 128,5±18,1 | 14,1 | 10,4 | 129,5±13,3 | 10,3 | 8,1  | 125,9±17,9 | 14,2 | 10,3 |
| <i>Flow</i>       |            |      |      |            |      |      |            |      |      |            |      |      |            |      |      |            |      |      |
| <b>OPERATOR 3</b> |            |      |      |            |      |      |            |      |      |            |      |      |            |      |      |            |      |      |
| <i>AxialWSS</i>   | 0,15±0,04  | 24,8 | 0,02 | 0,14±0,02  | 17,2 | 0,01 | 0,17±0,03  | 19,7 | 0,02 | 0,20±0,05  | 24,0 | 0,03 | 0,21±0,06  | 28,4 | 0,03 | 0,24±0,05  | 19,3 | 0,03 |
| <i>CircWSS</i>    | 0,10±0,03  | 27,2 | 0,01 | 0,10±0,03  | 29   | 0,02 | 0,10±0,03  | 29   | 0,02 | 0,10±0,03  | 29   | 0,02 | 0,10±0,03  | 29   | 0,02 | 0,10±0,03  | 29   | 0,02 |
| <i>Flow</i>       | 129,4±18,5 | 14,3 | 10,7 | 129,4±18,5 | 14,3 | 10,7 | 129,4±18,5 | 14,3 | 10,7 | 129,4±18,5 | 14,3 | 10,7 | 129,4±18,5 | 14,3 | 10,7 | 129,4±18,5 | 14,3 | 10,7 |



**Supplementary Table S5\_ Inter-operator & inter-device.**

| <b>4DFlow parameters</b>     | <b>OPERATOR 1</b> |           | <b>OPERATOR 2</b> |           | <b>OPERATOR 3</b> |           |
|------------------------------|-------------------|-----------|-------------------|-----------|-------------------|-----------|
| <b>AxialWSS</b>              | <i>mean±sd</i>    | <i>CV</i> | <i>mean±sd</i>    | <i>CV</i> | <i>mean±sd</i>    | <i>CV</i> |
| <i>Philips 1.5 T</i>         | 0,19±0,03         | 14,8      | 0,18±0,03         | 16,7      | 0,19±0,03         | 16,5      |
| <i>Philips 3 T</i>           | 0,17±0,03         | 15,4      | 0,17±0,03         | 12,9      | 0,17±0,03         | 13,1      |
| <i>Siemens 3 T</i>           | 0,11±0,02         | 16,7      | 0,11±0,02         | 19,7      | 0,11±0,02         | 17,2      |
| <b>MaxAxialWSS</b>           | <i>mean±sd</i>    | <i>CV</i> | <i>mean±sd</i>    | <i>CV</i> | <i>mean±sd</i>    | <i>CV</i> |
| <i>Philips 1.5 T</i>         | 1,39±0,36         | 25,6      | 1,48±0,44         | 29,6      | 1,46±0,33         | 22,7      |
| <i>Philips 3 T</i>           | 1, 17±0,20        | 17,2      | 1,24±0,34         | 27,8      | 1, 18±0,33        | 27,6      |
| <i>Siemens 3 T</i>           | 0,72±0,10         | 14,5      | 0,71±0,15         | 20,4      | 0,92±0,24         | 26,7      |
| <b>CircWSS</b>               | <i>mean±sd</i>    | <i>CV</i> | <i>mean±sd</i>    | <i>CV</i> | <i>mean±sd</i>    | <i>CV</i> |
| <i>Philips 1.5 T</i>         | 0,10±0,03         | 29,9      | 0,10±0,02         | 23,0      | 0,10±0,02         | 20,6      |
| <i>Philips 3 T</i>           | 0,08±0,01         | 10,8      | 0,08±0,01         | 10,7      | 0,08±0,01         | 9,0       |
| <i>Siemens 3 T</i>           | 0,04±0,01         | 16,2      | 0,04±0,01         | 14,7      | 0,04±0,01         | 17,2      |
| <b>MaxCircumferentialWSS</b> | <i>mean±sd</i>    | <i>CV</i> | <i>mean±sd</i>    | <i>CV</i> | <i>mean±sd</i>    | <i>CV</i> |
| <i>Philips 1.5 T</i>         | 0,92±0,25         | 27,4      | 0,86±0,26         | 30,5      | 0,84±0,22         | 26,2      |
| <i>Philips 3 T</i>           | 0,66±0,13         | 19,6      | 0,61±0,18         | 29,5      | 0,59±0,22         | 36,8      |
| <i>Siemens 3 T</i>           | 0,27±0,07         | 24,5      | 0,30±0,03         | 9,5       | 0,40±0,15         | 37,8      |
| <b>Flow</b>                  | <i>mean±sd</i>    | <i>CV</i> | <i>mean±sd</i>    | <i>CV</i> | <i>mean±sd</i>    | <i>CV</i> |
| <i>Philips 1.5 T</i>         | 122,5±17,7        | 14,4      | 121,8±17,2        | 14,2      | 123,4±16,9        | 13,7      |
| <i>Philips 3 T</i>           | 117,7±15,5        | 13,2      | 116,4±13,9        | 12,0      | 117,6±14,0        | 11,9      |
| <i>Siemens 3 T</i>           | 101,8±14,9        | 14,6      | 100,7±15,6        | 15,5      | 103,2±15,2        | 14,7      |

| <b>MaximumFlow</b>          | <i>mean±sd</i> | <i>CV</i> | <i>mean±sd</i> | <i>CV</i> | <i>mean±sd</i> | <i>CV</i> |
|-----------------------------|----------------|-----------|----------------|-----------|----------------|-----------|
| <i>Philips 1.5 T</i>        | 234,1±40,7     | 17,4      | 234,0±36,1     | 15,4      | 228,5±40,4     | 17,7      |
| <i>Philips 3 T</i>          | 255,0±65,8     | 25,8      | 247,4±63,6     | 25,8      | 241,4±60,5     | 25,1      |
| <i>Siemens 3 T</i>          | 237,3±49,4     | 20,8      | 242,2±57,2     | 23,6      | 234,1±46,5     | 19,9      |
| <b>MaximumMeanVelocity</b>  | <i>mean±sd</i> | <i>CV</i> | <i>mean±sd</i> | <i>CV</i> | <i>mean±sd</i> | <i>CV</i> |
| <i>Philips 1.5 T</i>        | 78,0±9,0       | 11,5      | 79,2±13,7      | 17,3      | 77,7±10,4      | 13,4      |
| <i>Philips 3 T</i>          | 65,6±13,6      | 20,7      | 66,6±9,4       | 14,1      | 63,8±10,3      | 16,2      |
| <i>Siemens 3 T</i>          | 65,7±10,9      | 16,6      | 65,5±10,9      | 16,6      | 69,3±11,4      | 16,4      |
| <b>MaxPressureGradient</b>  | <i>mean±sd</i> | <i>CV</i> | <i>mean±sd</i> | <i>CV</i> | <i>mean±sd</i> | <i>CV</i> |
| <i>Philips 1.5 T</i>        | 5,8±1,3        | 22,1      | 5,9±1,4        | 23,0      | 6,0±1,2        | 19,2      |
| <i>Philips 3 T</i>          | 5,3±1,3        | 25,9      | 4,8±1,3        | 27,0      | 4,4±1,1        | 25,4      |
| <i>Siemens 3 T</i>          | 4,24±1,33      | 31,4      | 4,20±1,22      | 29,1      | 4,36±1,27      | 29,2      |
| <b>MeanPressureGradient</b> | <i>mean±sd</i> | <i>CV</i> | <i>mean±sd</i> | <i>CV</i> | <i>mean±sd</i> | <i>CV</i> |
| <i>Philips 1.5 T</i>        | 1,36±0,32      | 23,8      | 1,32±0,32      | 23,9      | 1,37±0,25      | 18,5      |
| <i>Philips 3 T</i>          | 1,07±0,3       | 25,5      | 1,01±0,3       | 28,7      | 1,00±0,3       | 30,2      |
| <i>Siemens 3 T</i>          | 0,77±0,23      | 29,7      | 0,77±0,22      | 29,0      | 0,82±0,24      | 29,9      |
| <b>TotalVolume</b>          | <i>mean±sd</i> | <i>CV</i> | <i>mean±sd</i> | <i>CV</i> | <i>mean±sd</i> | <i>CV</i> |
| <i>Philips 1.5 T</i>        | 52,9±9,0       | 17,0      | 53,5±8,2       | 15,4      | 53,1±7,7       | 14,5      |
| <i>Philips 3 T</i>          | 58,3±11,5      | 19,7      | 56,00±12,4     | 22,1      | 52,1±14,5      | 27,8      |
| <i>Siemens 3 T</i>          | 53,7±8,95      | 16,7      | 55,5±10,9      | 19,6      | 53,3±8,4       | 15,8      |

**Supplementary Table S6\_CCC inter-operator agreement.**

| Inter – operator agreement   |                                |              |                                |              |                                |              |
|------------------------------|--------------------------------|--------------|--------------------------------|--------------|--------------------------------|--------------|
| <i>Philips 1.5 T</i>         | <i>operator 1 - operator 2</i> |              | <i>operator 1 - operator 3</i> |              | <i>operator 2 - operator 3</i> |              |
| <b>4DFlow parameters</b>     | <b>CCC</b>                     | <b>95%CI</b> | <b>CCC</b>                     | <b>95%CI</b> | <b>CCC</b>                     | <b>95%CI</b> |
| <i>AxialWSS</i>              | 0,84                           | 0,58- 0,94   | 0,77                           | 0,44- 0,91   | 0,79                           | 0,48- 0,93   |
| <i>MaxAxialWSS</i>           | 0,10                           | 0 - 0,19     | 0,06                           | -0,02- 0,13  | 0,67                           | 0,16- 0,90   |
| <i>CircWSS</i>               | 0,002                          | 0 - 0,003    | 0,002                          | 0 - 0,003    | -0,014                         | -0,08- 0,06  |
| <i>MaxCircumferentialWSS</i> | 0, 08                          | -0,01- 0,17  | -0, 01                         | -0,08- 0,06  | -0, 05                         | 0,62- 0,56   |
| <i>Flow</i>                  | 0,92                           | 0,78- 0,97   | 0,94                           | 0,82- 0,98   | 0,95                           | 0,86- 0,99   |
| <i>MaximumFlow</i>           | 0                              | 0 - 0        | 0                              | 0 - 0        | 0,71                           | 0,20- 0,92   |
| <i>MaximumMeanVelocity</i>   | 0,84                           | 0,63- 0,93   | 0,90                           | 0,66- 0,97   | 0,91                           | 0,77- 0,97   |
| <i>MaxPressureGradient</i>   | 0,93                           | 0,75- 0,98   | 0,91                           | 0,71- 0,98   | 0,95                           | 0,84- 0,98   |
| <i>MeanPressureGradient</i>  | 0,88                           | 0,60- 0,97   | 0,86                           | 0,59- 0,96   | 0,94                           | 0,84- 0,98   |
| <i>TotalVolume</i>           | 0,838                          | 0,58- 0,94   | 0,86                           | 0,6663- 0,97 | 0,82                           | 0,43- 0,95   |
| <i>Philips 3T</i>            | <i>operator 1 - operator 2</i> |              | <i>operator 1 - operator 3</i> |              | <i>operator 2 - operator 3</i> |              |
| <b>4DFlow parameters</b>     | <b>CCC</b>                     | <b>95%CI</b> | <b>CCC</b>                     | <b>95%CI</b> | <b>CCC</b>                     | <b>95%CI</b> |
| <i>AxialWSS</i>              | 0,68                           | 0,28- 0,88   | 0,93                           | 0,82- 0,97   | 0,87                           | 0,67- 0,96   |
| <i>MaxAxialWSS</i>           | 0,10                           | 0 - 0,19     | 0,06                           | -0,02- 0,13  | 0,94                           | 0,82- 0,98   |
| <i>CircWSS</i>               | 0,46                           | -0,07- 0,78  | 0,82                           | 0,55- 0,94   | 0,86                           | 0,63- 0,95   |
| <i>MaxCircumferentialWSS</i> | 0,20                           | -0,30- 0,61  | 0,21                           | -0,24- 0,59  | 0,88                           | 0,69- 0,96   |
| <i>Flow</i>                  | 0,90                           | 0,73- 0,97   | 0,98                           | 0,96- 0,99   | 0,94                           | 0,83- 0,98   |

|                             |      |            |       |            |      |            |
|-----------------------------|------|------------|-------|------------|------|------------|
| <i>MaximumFlow</i>          | 0,90 | 0,71- 0,97 | 0,89  | 0,70- 0,96 | 0,98 | 0,96- 0,99 |
| <i>MaximumMeanVelocity</i>  | 0,83 | 0,63- 0,92 | 0,77  | 0,47- 0,91 | 0,92 | 0,79- 0,97 |
| <i>MaxPressureGradient</i>  | 0,89 | 0,70- 0,96 | 0, 78 | 0,53- 0,91 | 0,92 | 0,8- 0,97  |
| <i>MeanPressureGradient</i> | 0,89 | 0,70- 0,96 | 0,90  | 0,73- 0,96 | 0,97 | 0,91- 0,99 |
| <i>TotalVolume</i>          | 0,90 | 0,73- 0,96 | 0,81  | 0,60- 0,92 | 0,93 | 0,83- 0,97 |

| <i>Siemens 3T</i>            | <i>operator 1 - operator 2</i> |              | <i>operator 1 - operator 3</i> |              | <i>operator 2 - operator 3</i> |              |
|------------------------------|--------------------------------|--------------|--------------------------------|--------------|--------------------------------|--------------|
| <b>4DFlow parameters</b>     | <b>CCC</b>                     | <b>95%CI</b> | <b>CCC</b>                     | <b>95%CI</b> | <b>CCC</b>                     | <b>95%CI</b> |
| <i>AxialWSS</i>              | 0,73                           | 0,37- 0,9    | 0,94                           | 0,82- 0,98   | 0,70                           | -0,27- 0,47  |
| <i>MaxAxialWSS</i>           | 0,90                           | 0,78 - 0,96  | 0,11                           | -0,2- 0,4    | 0,11                           | -0,2- 0,4    |
| <i>CircWSS</i>               | 0,61                           | 0,15- 0,85   | 0,83                           | 0,55- 0,94   | 0,67                           | 0,25- 0,87   |
| <i>MaxCircumferentialWSS</i> | 0,17                           | -0,26- 0,54  | 0,002                          | -0,02- 0,02  | 0,004                          | -0,003- 0,01 |
| <i>Flow</i>                  | 0,96                           | 0,88- 0,99   | 0,98                           | 0,93- 0,99   | 0,96                           | 0,89- 0,99   |
| <i>MaximumFlow</i>           | 0,96                           | 0,88- 0,99   | 0,99                           | 0,95- 0,99   | 0,93                           | 0,79- 0,98   |
| <i>MaximumMeanVelocity</i>   | 0,83                           | 0,63- 0,92   | 0,77                           | 0,47- 0,91   | 0,92                           | 0,79- 0,97   |
| <i>MaxPressureGradient</i>   | 0,89                           | 0,70- 0,96   | 0, 78                          | 0,53- 0,91   | 0,92                           | 0,8- 0,97    |
| <i>MeanPressureGradient</i>  | 0,89                           | 0,70- 0,96   | 0,90                           | 0,73- 0,96   | 0,97                           | 0,91- 0,99   |
| <i>TotalVolume</i>           | 0,90                           | 0,73- 0,96   | 0,81                           | 0,60- 0,92   | 0,93                           | 0,83- 0,97   |

## 1.1 Supplementary Figures

**Supplementary Figures S1:** Correlation plots. For each operator and for each device, Spearman's correlation between 4D-Flow parameters is reported. The circle size is scaled by the correlation coefficient value. Blue and red colours designate positive and negative correlations, respectively. (\*P < 0.05; \*\*P < 0.01; \*\*\*P < 0.001).

**Supplementary Figures S2:** Bland – Altman plot of measures for each pair of raters. The dashed line represents the mean difference along with the 95% CI. The 95% limits of agreement are also presented on the plot.

**Supplementary Figure S3:** Inter device agreement of MaxMeanVel and TV.

For each parameter (MaxMeanVel and TV), boxplots of Kruskal-Wallis test show the comparison of measurements from 3 devices (Philips 1.5 T, Philips 3 T and Siemens 3 T) using data by operator 1, operator 2 and operator 3.

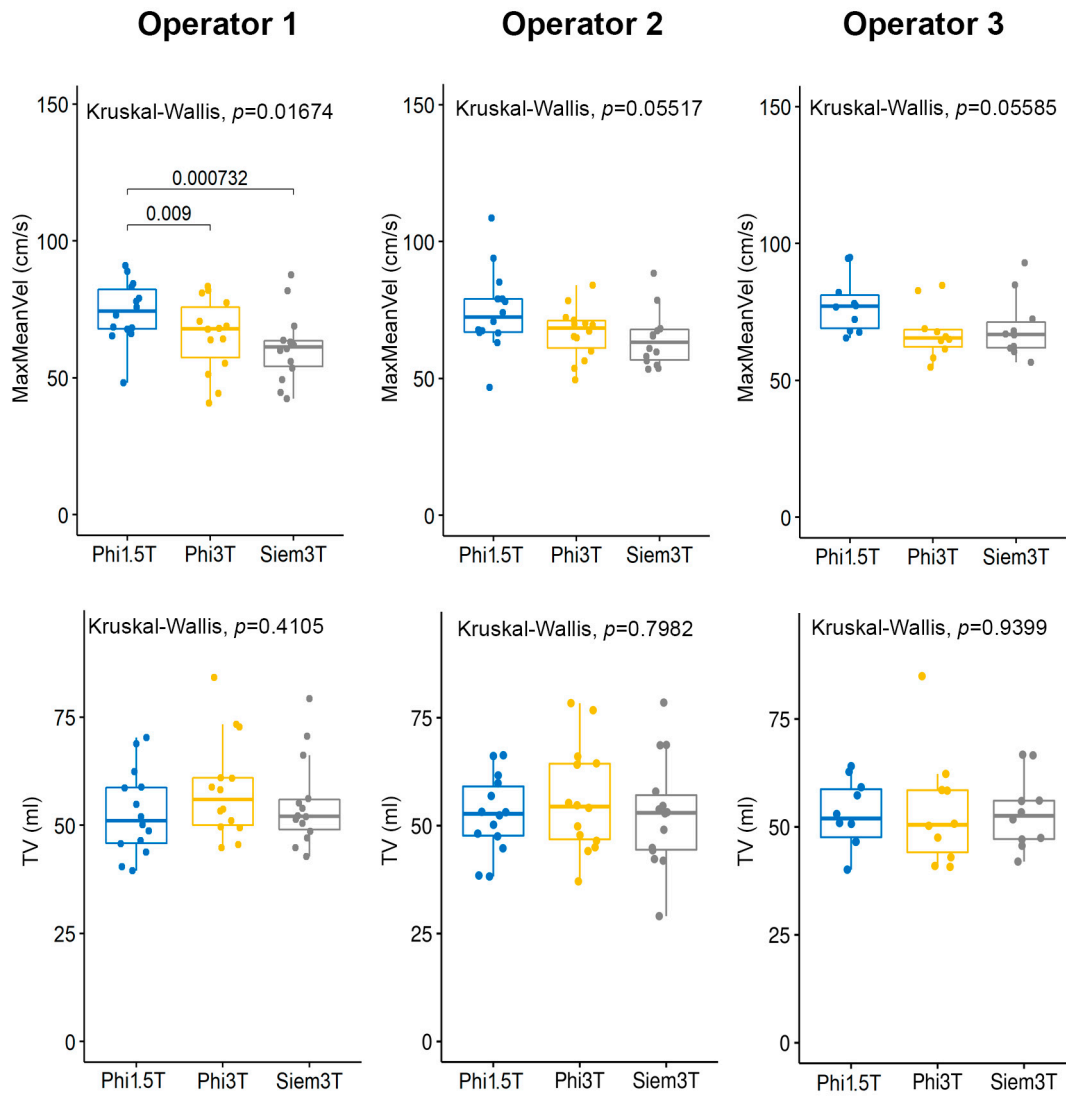



**Supplementary Figure S4:** Inter device agreement of PV, MaxFlow, MaxPressGrad and MeanPressGrad.

For each parameter (PV, MaxFlow, MaxPressGrad, MeanPressGrad), boxplots of Kruskal-Wallis test show the comparison of measurements from 3 devices (Philips 1.5 T, Philips 3 T and Siemens 3 T) using data by operator 1, operator 2 and operator 3.

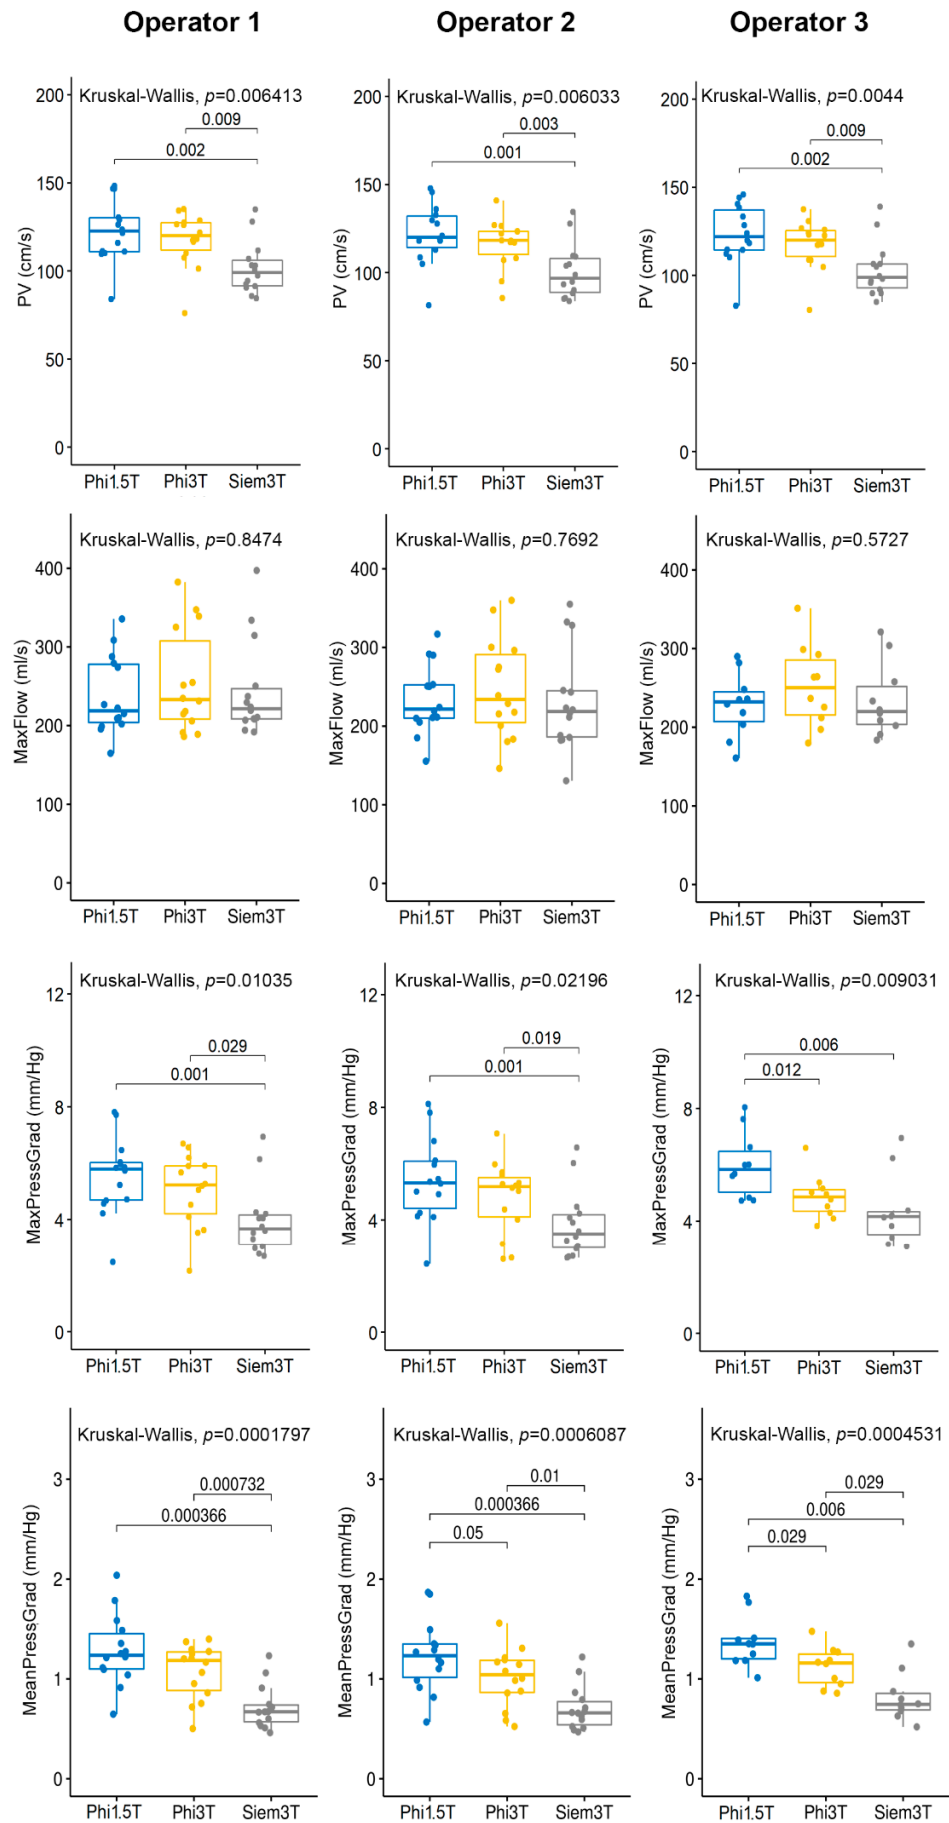

Supplement: s1 [file s1]
