# Supplementary figures and images for: 4D-Flow Cardiovascular Magnetic Resonance Sequence for Aortic Assessment: Multi-Vendor and Multi-Magnetic Field Reproducibility in Healthy Volunteers
Source: MDPI journal article supplement (doi:10.3390/jcm12082960), 2023-04-19

BP\_Phi1.5T

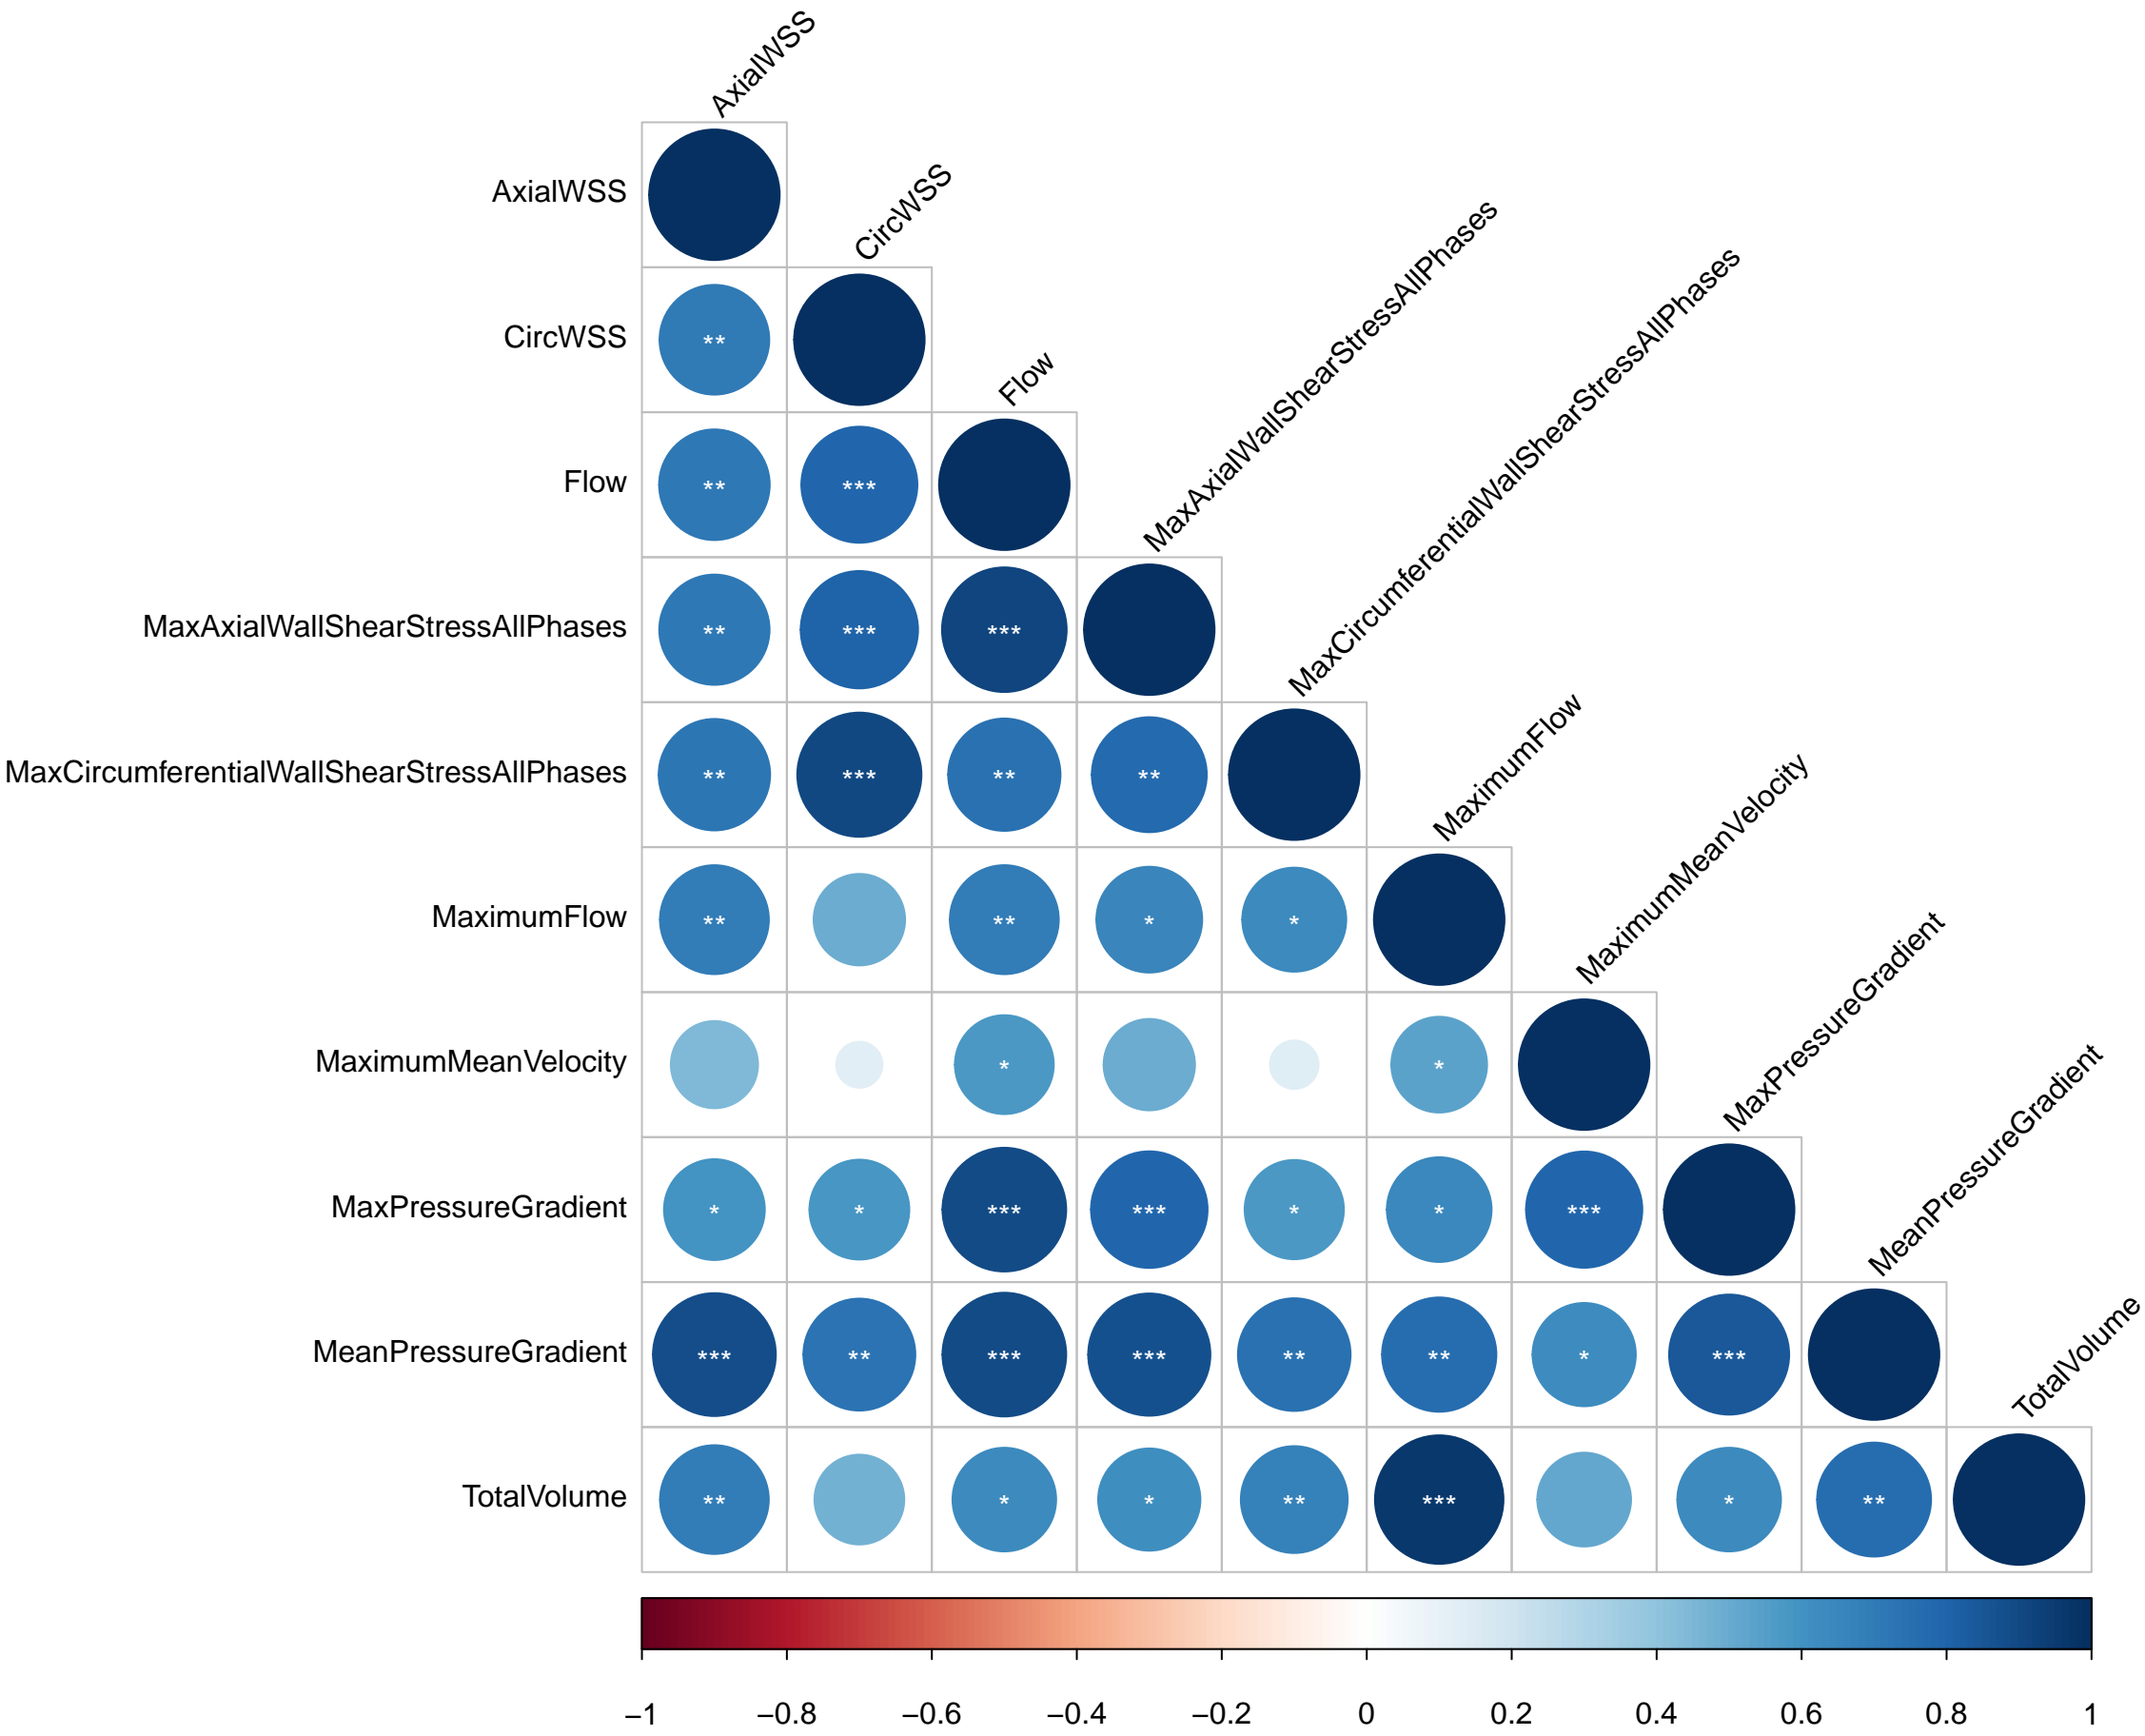

BP\_Phi3T

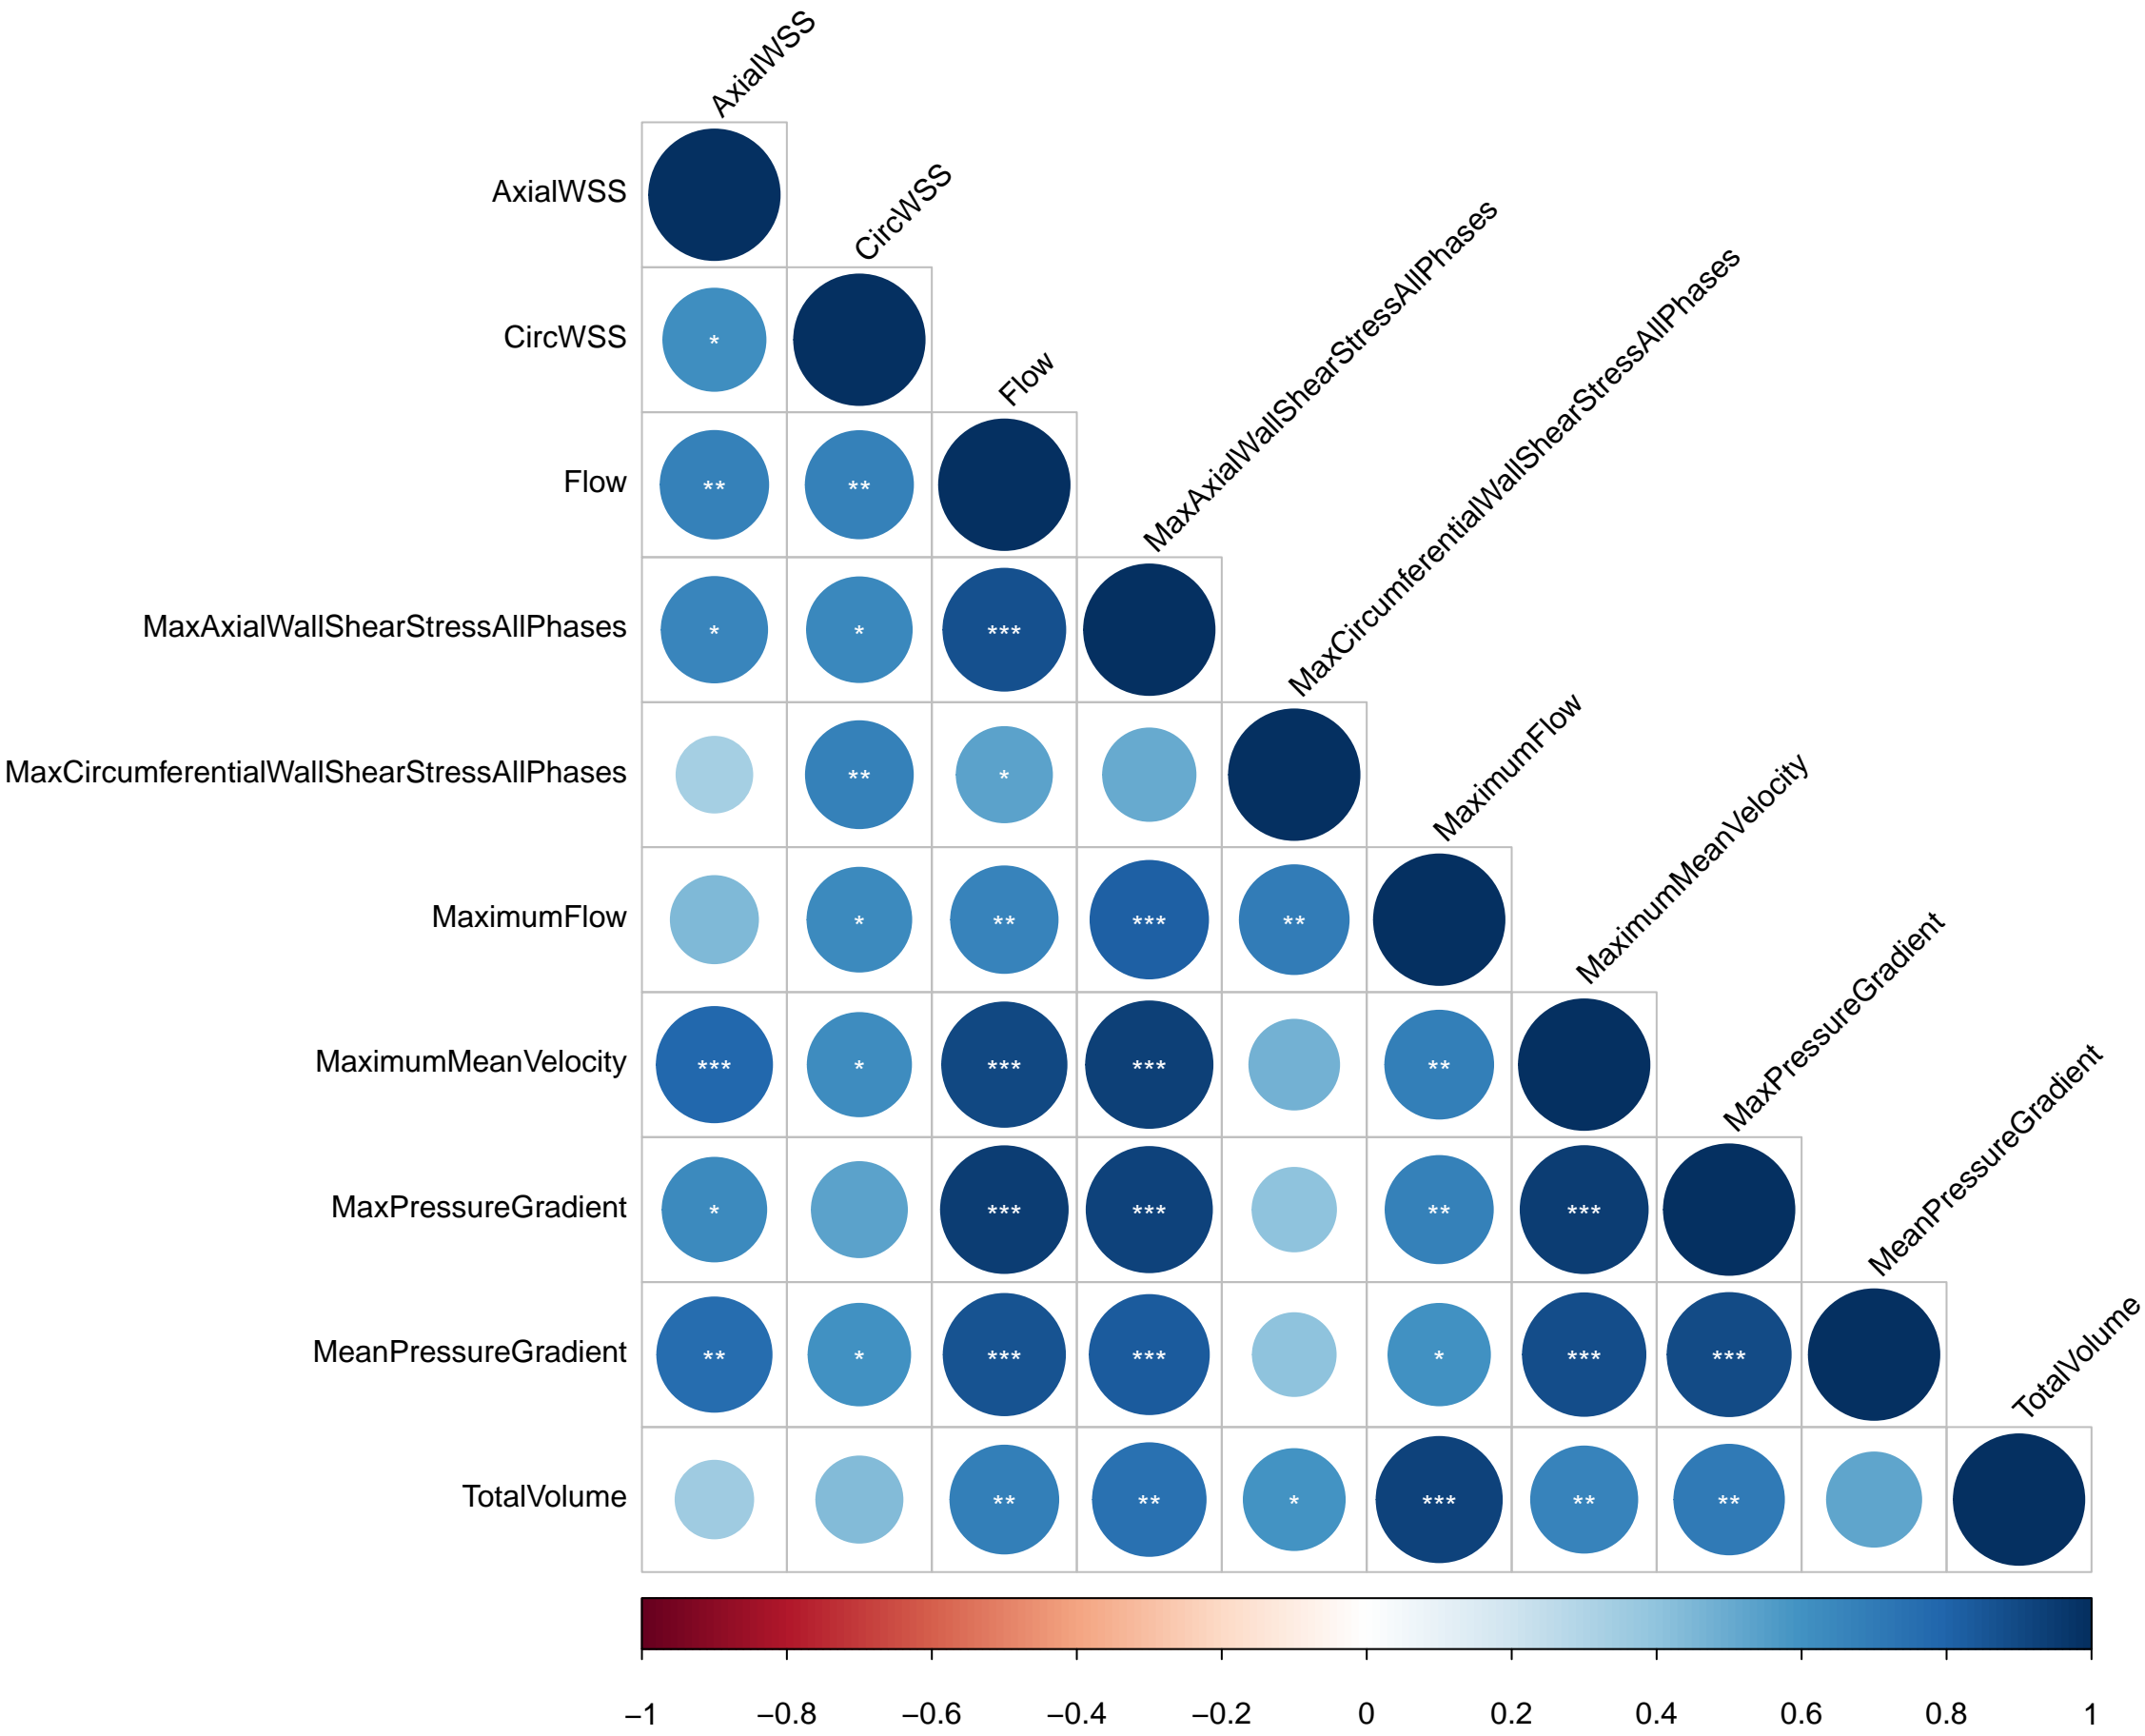

BP\_Siem3T

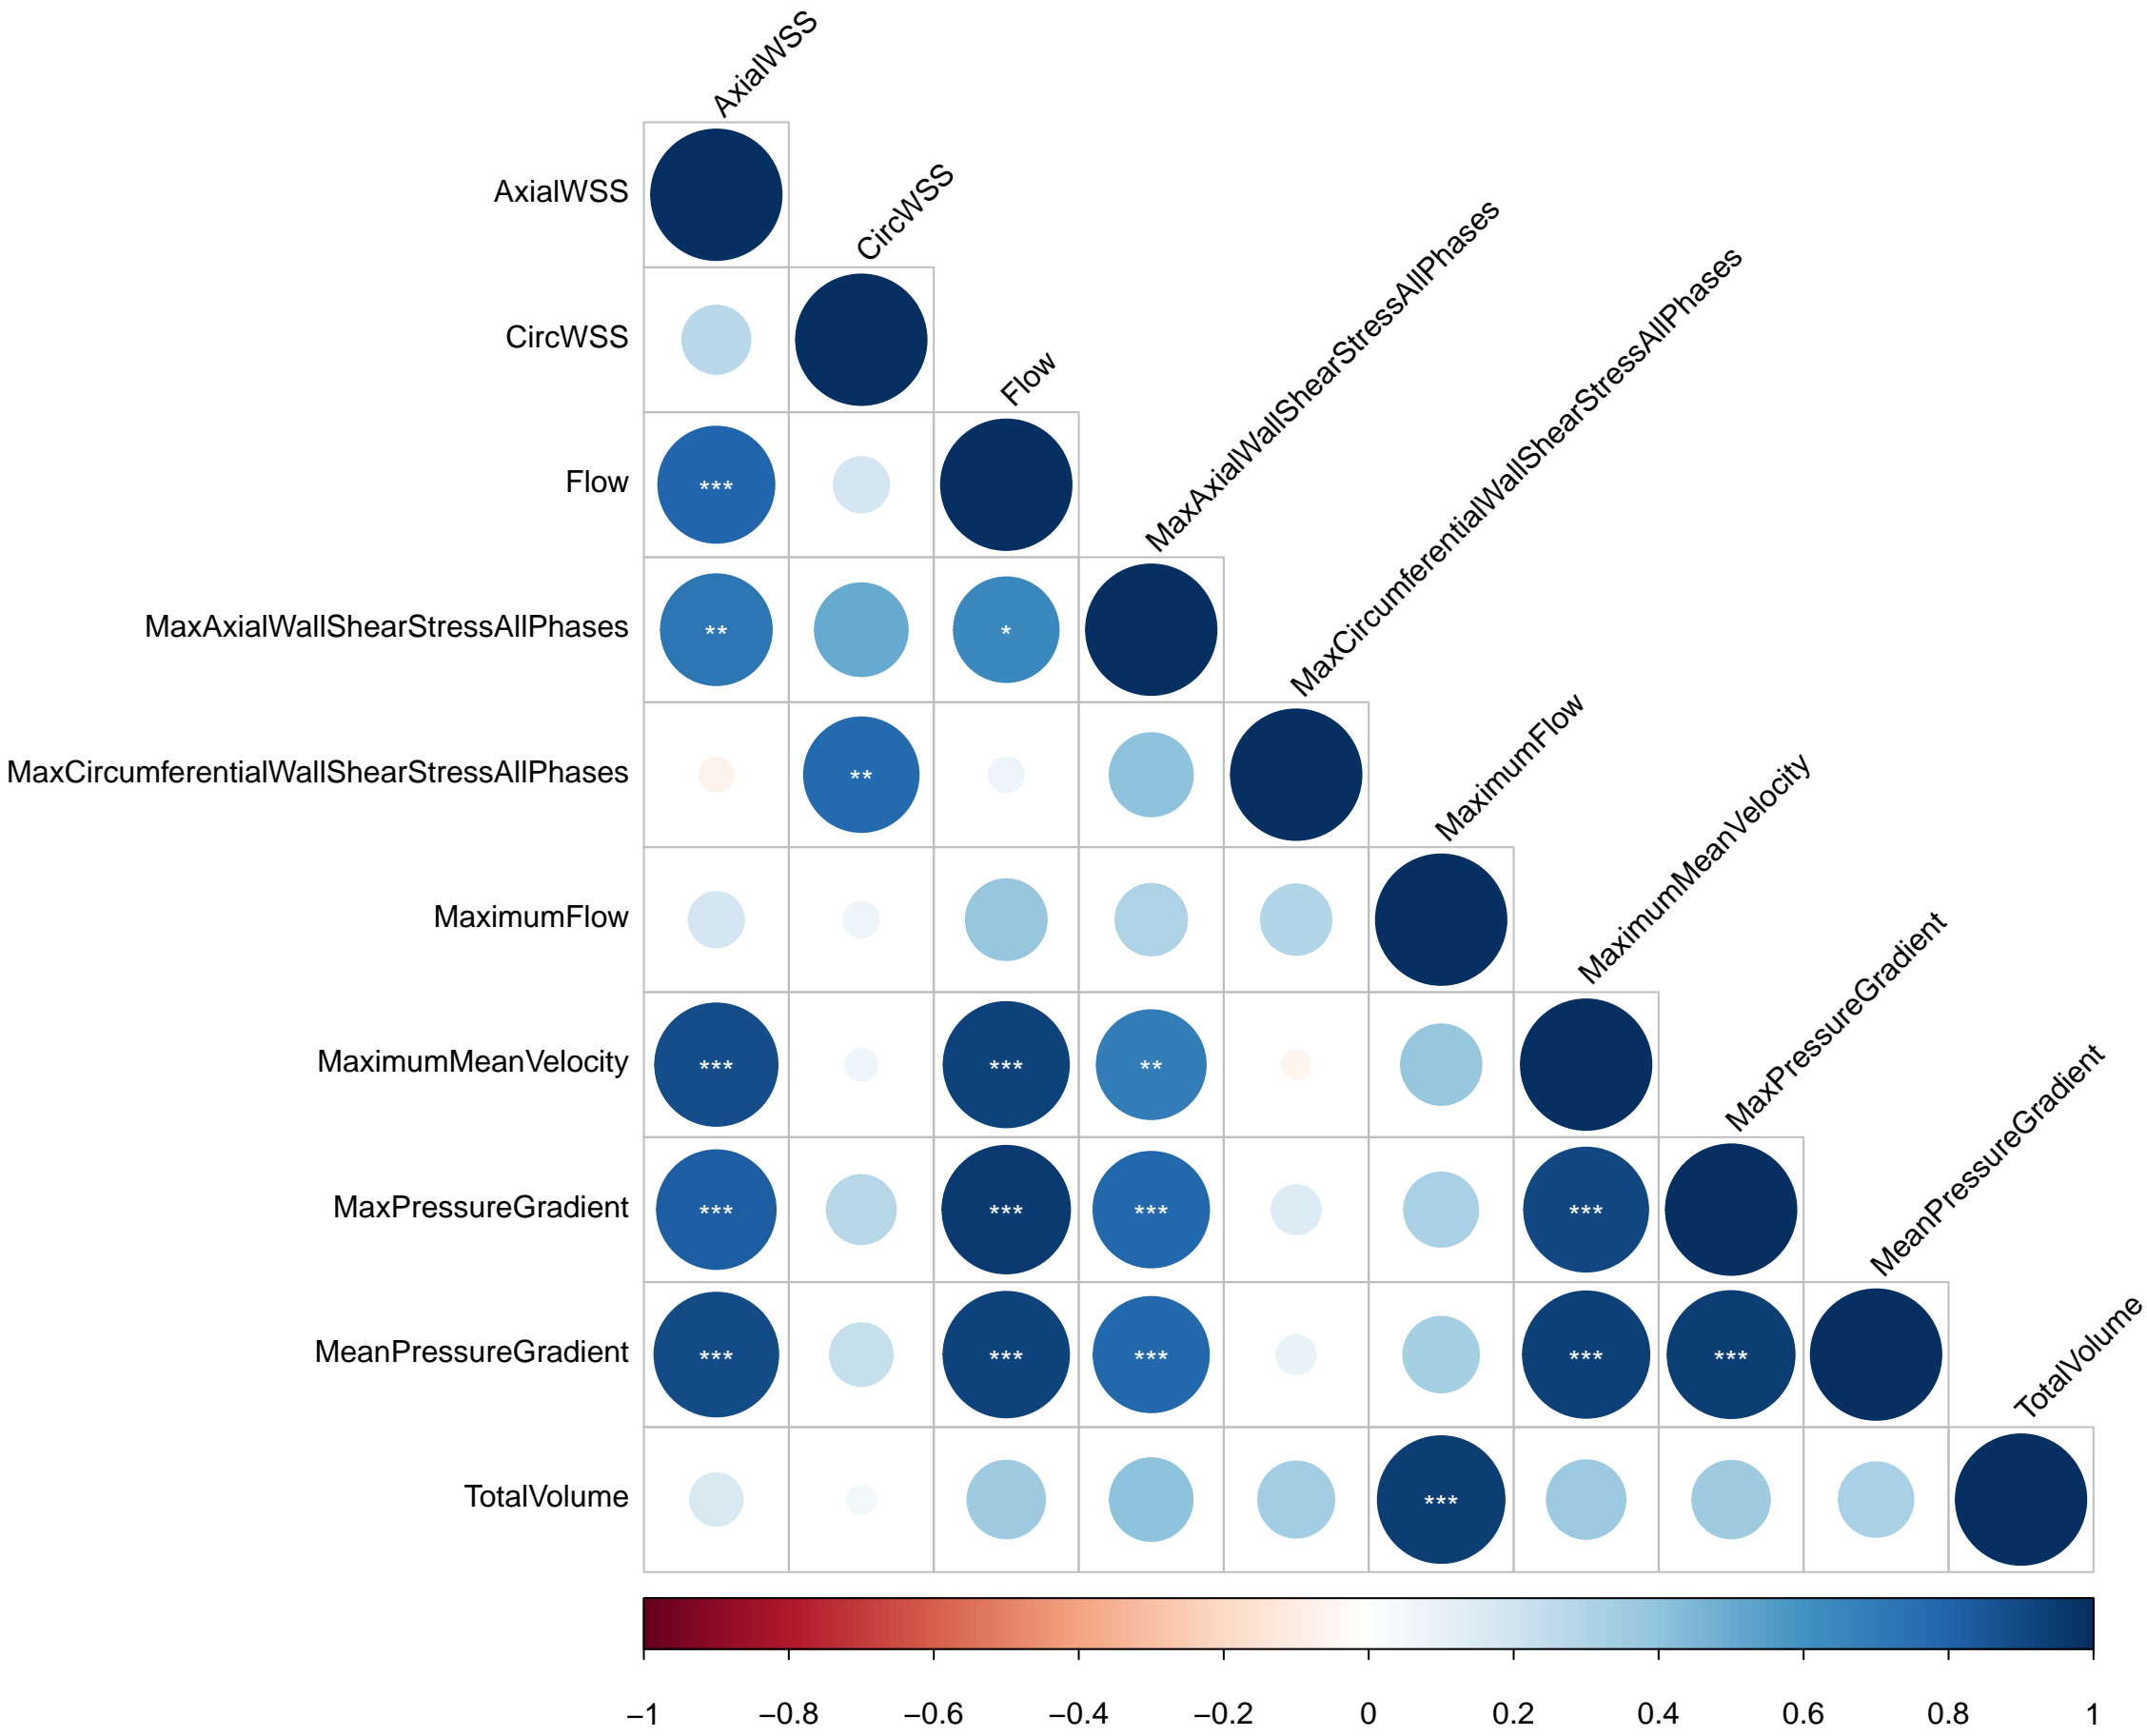

BR\_Phi1.5T

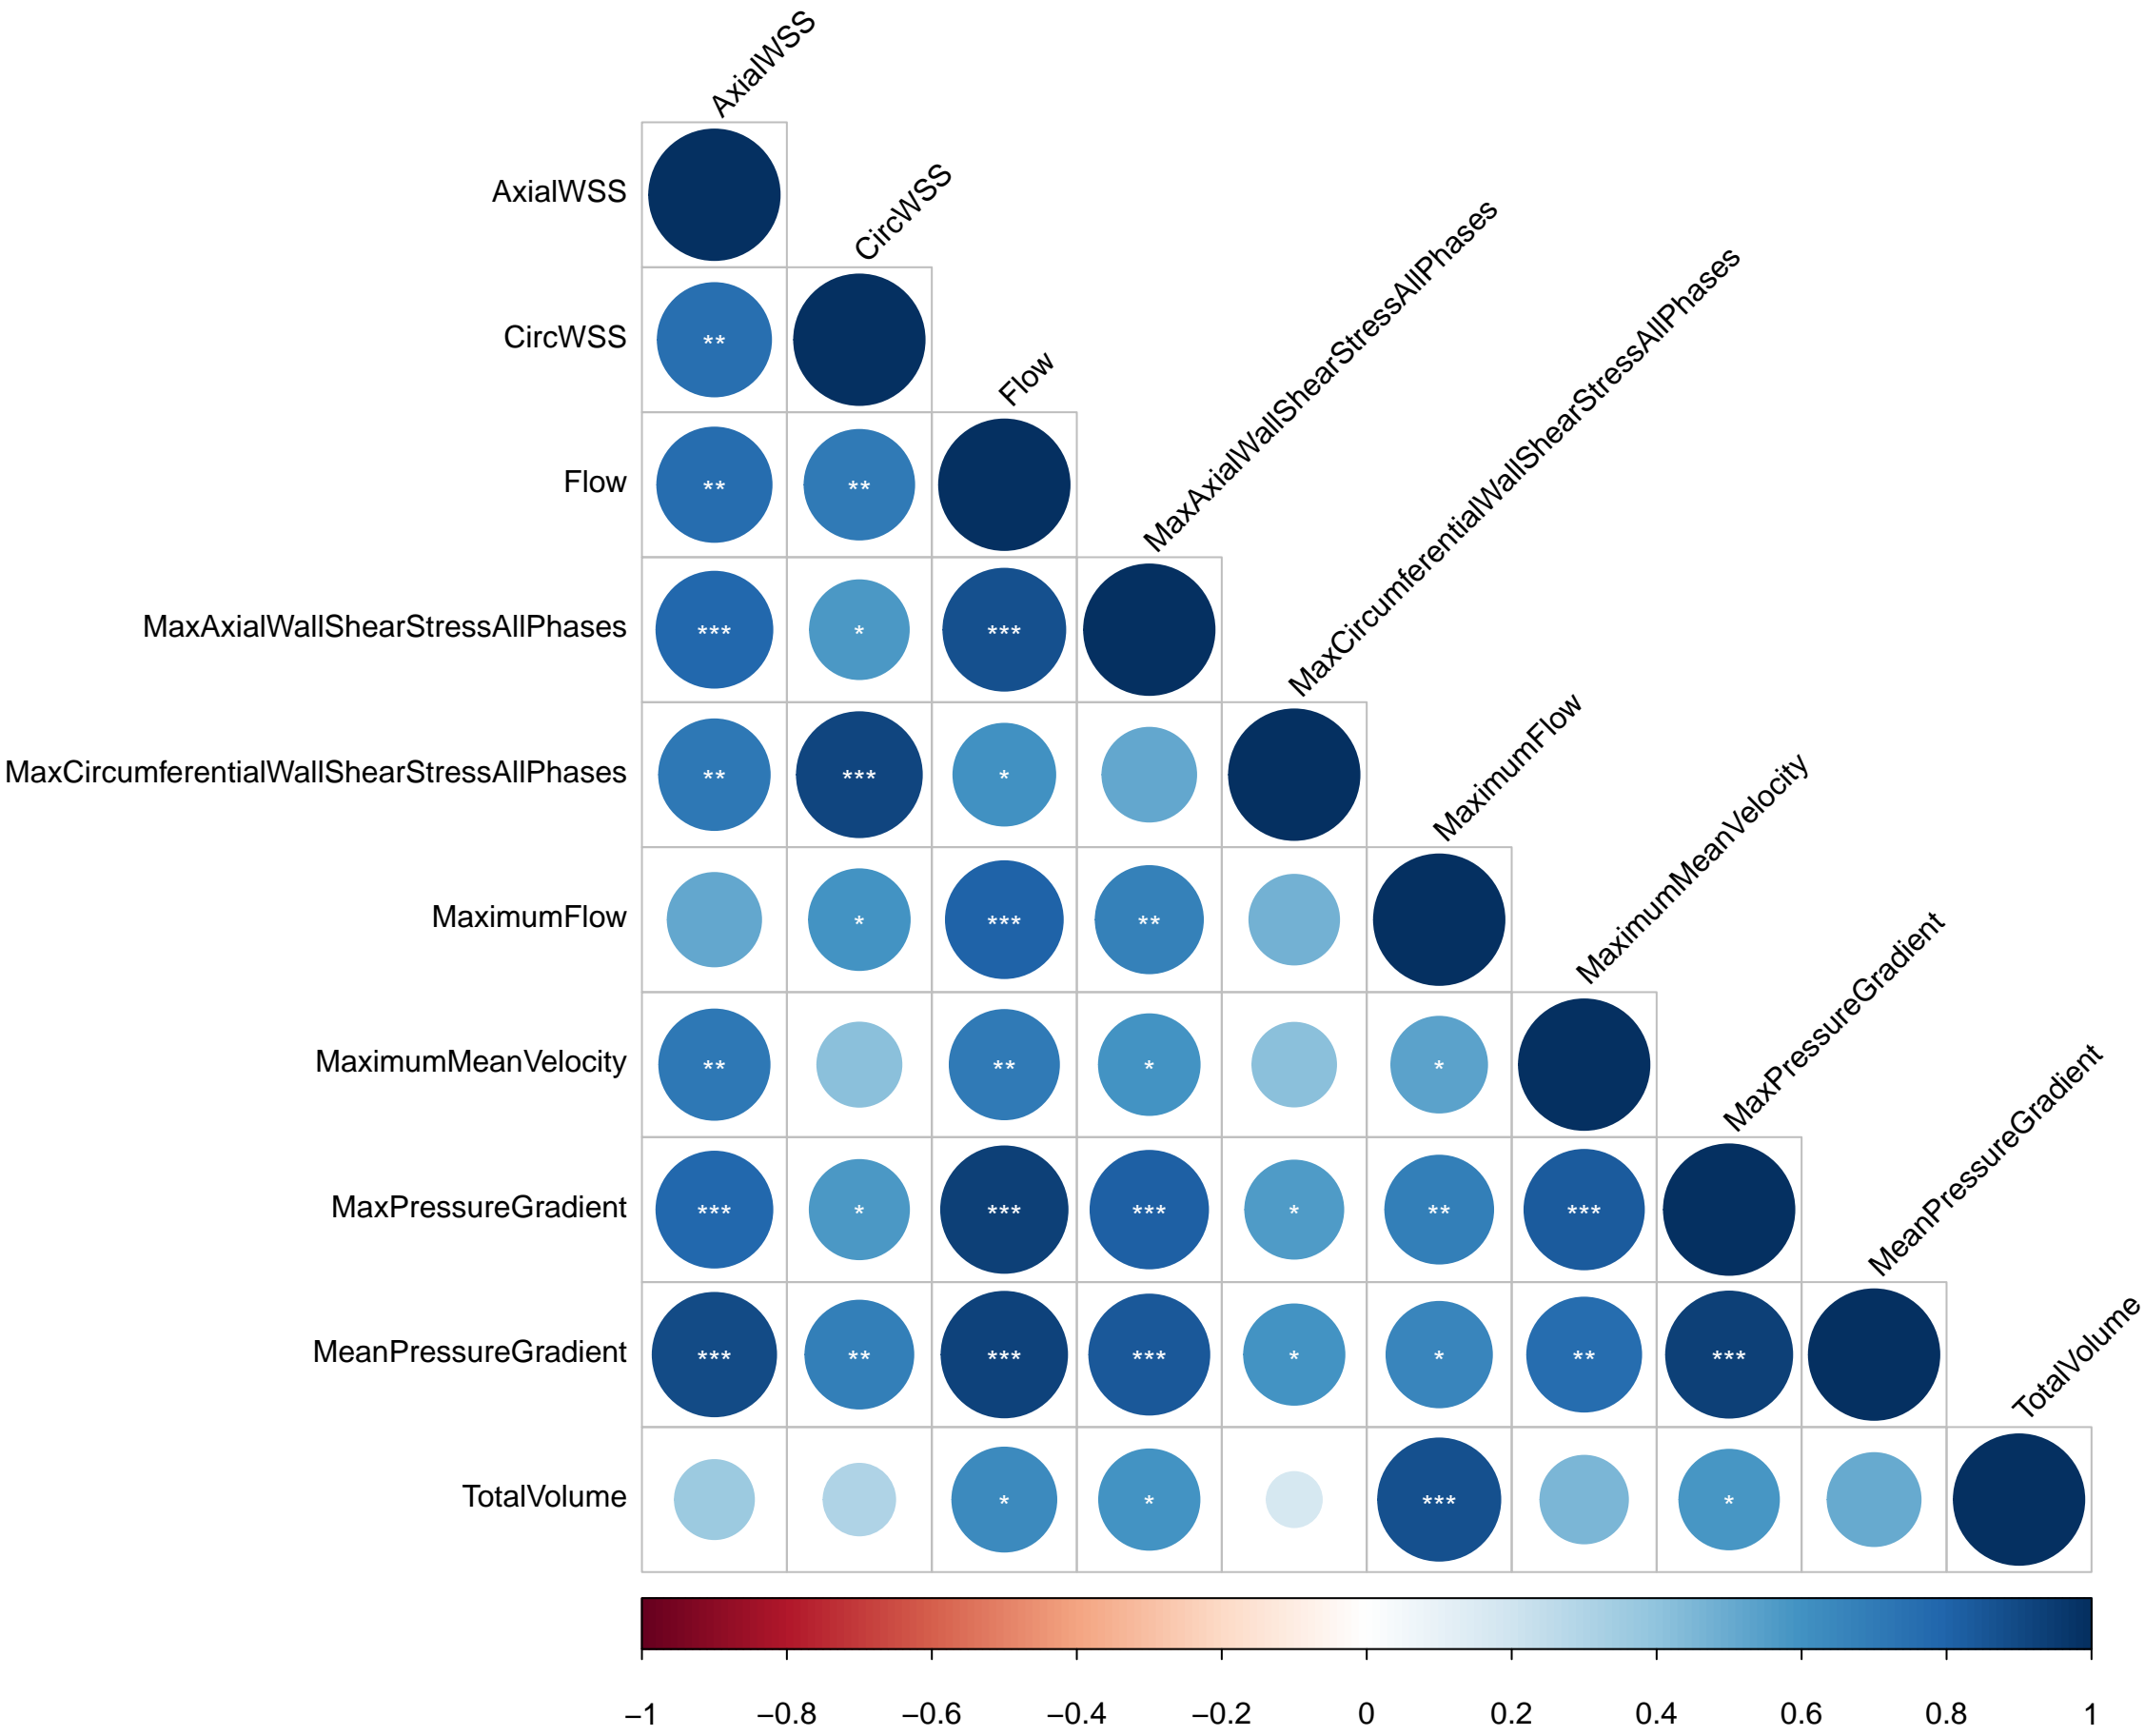

BR\_Phi3T

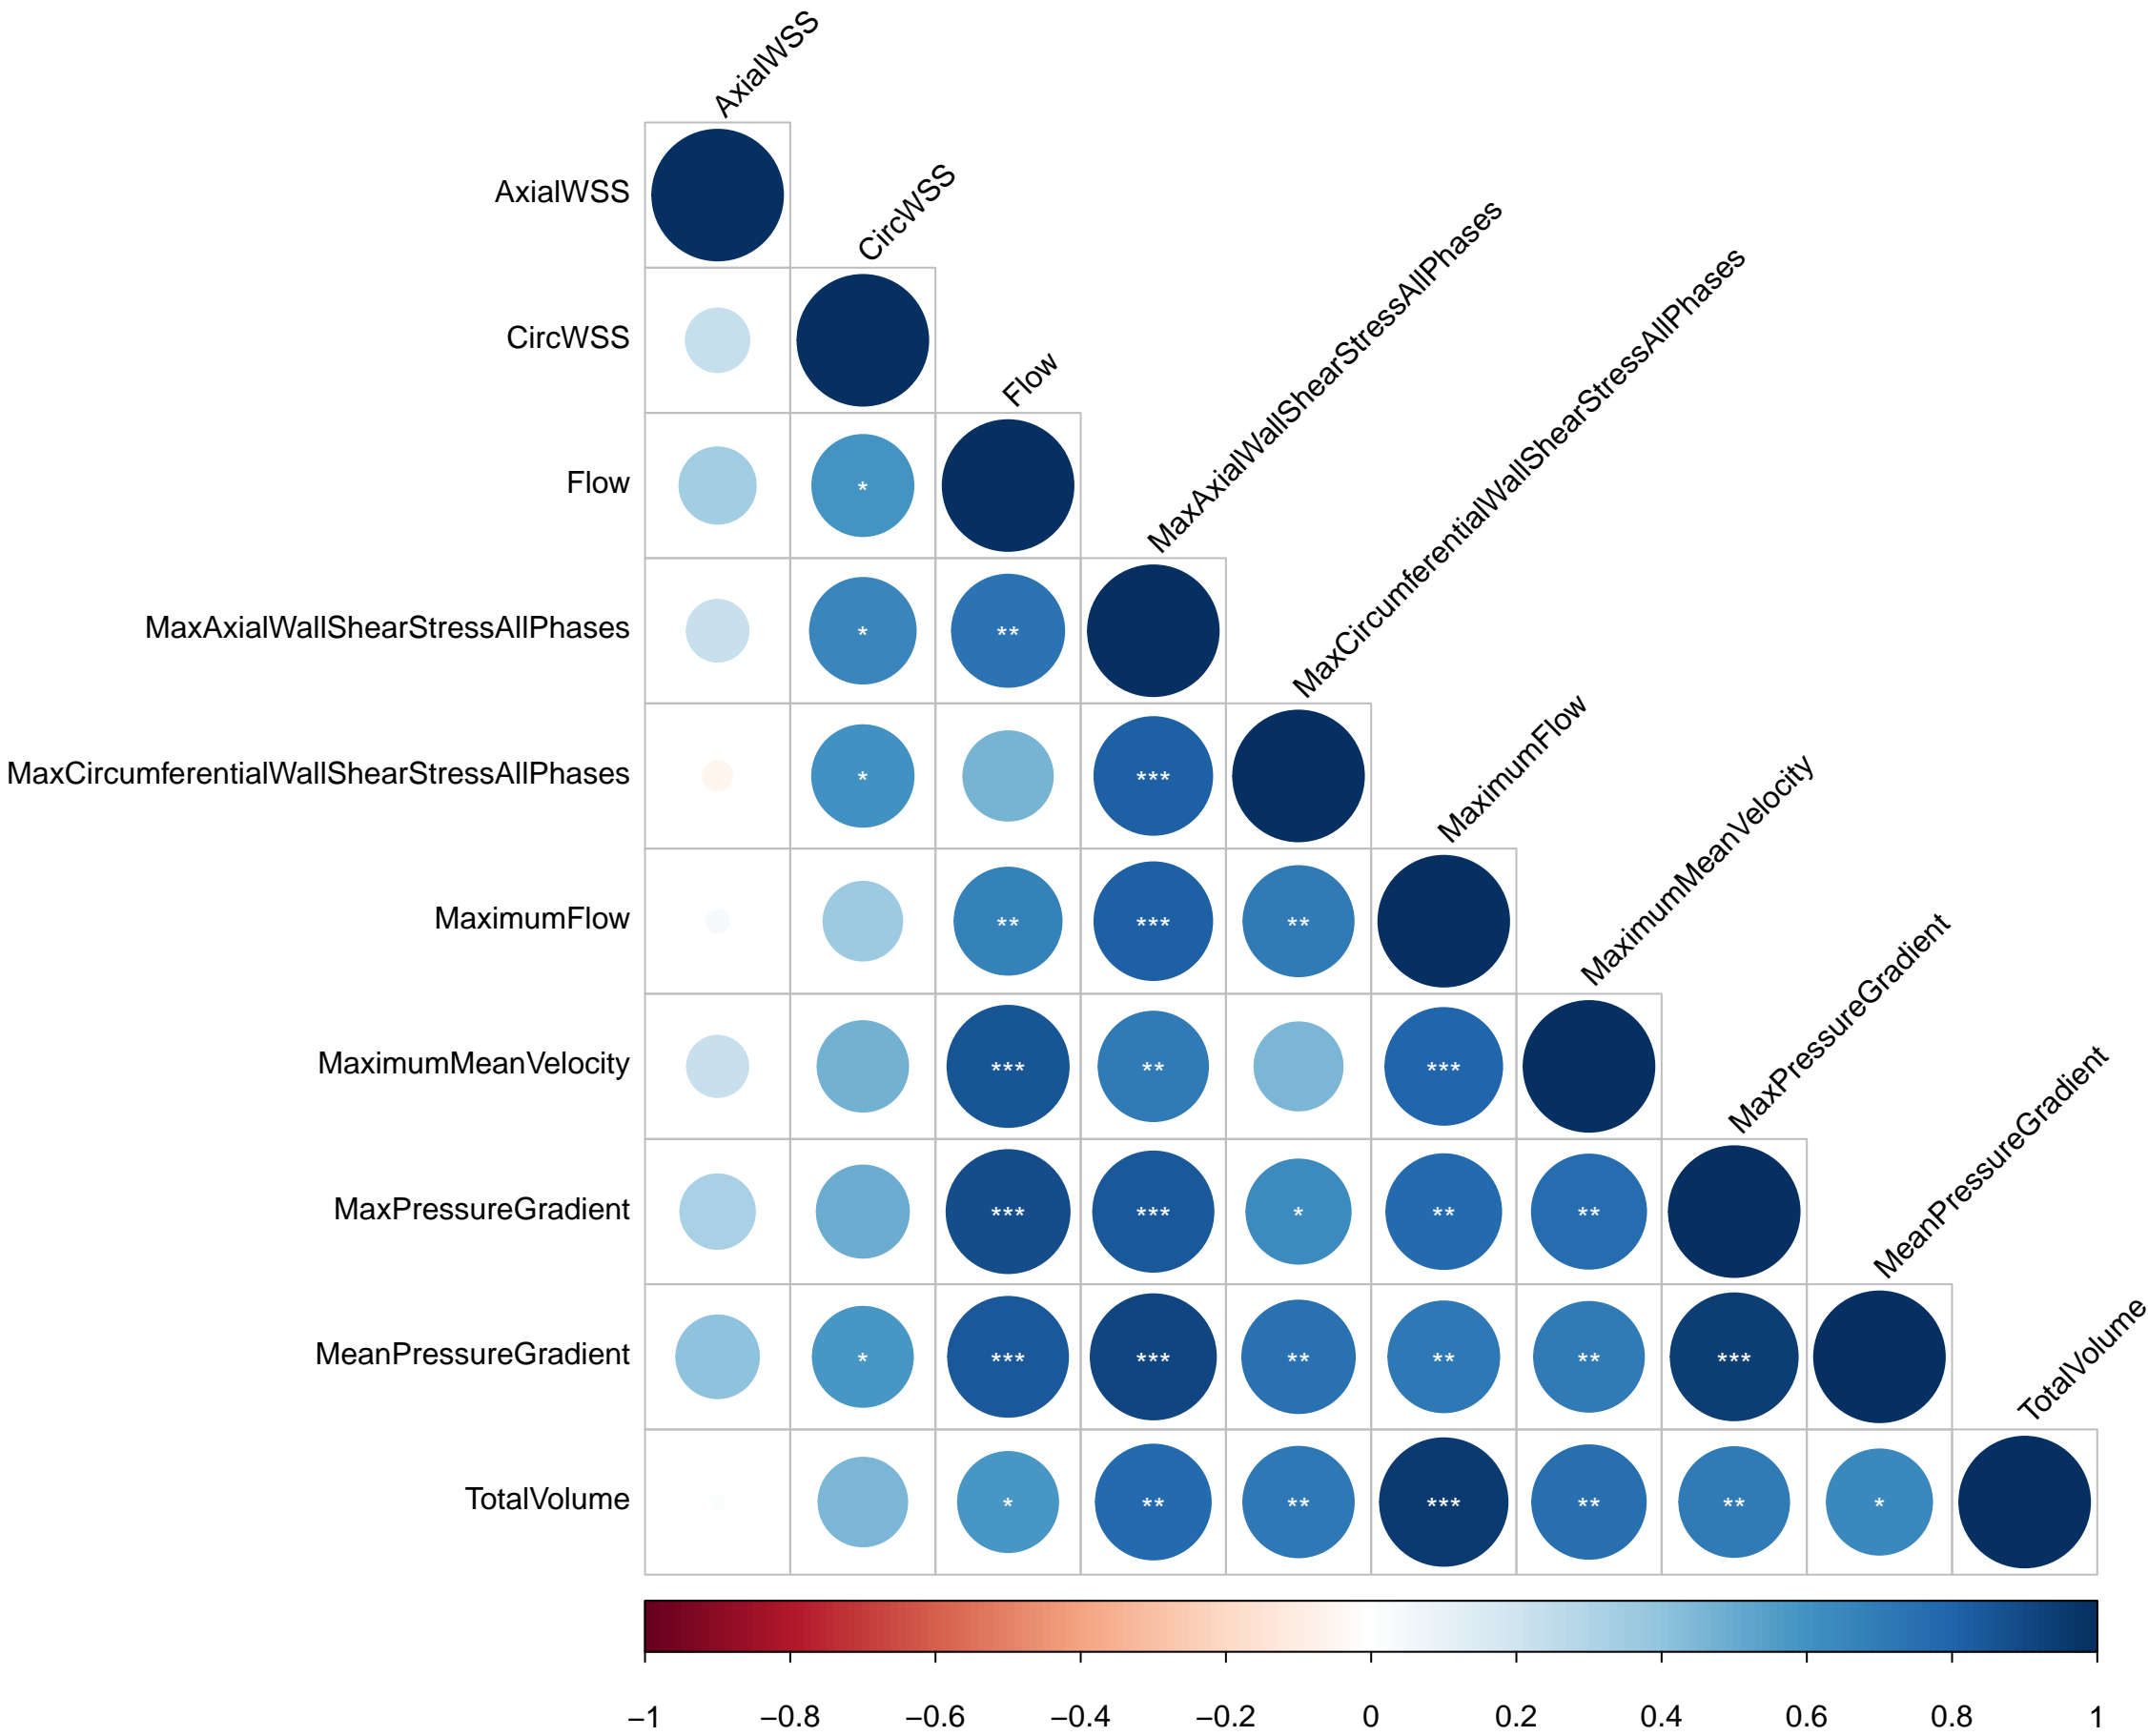

BR\_Siem3T

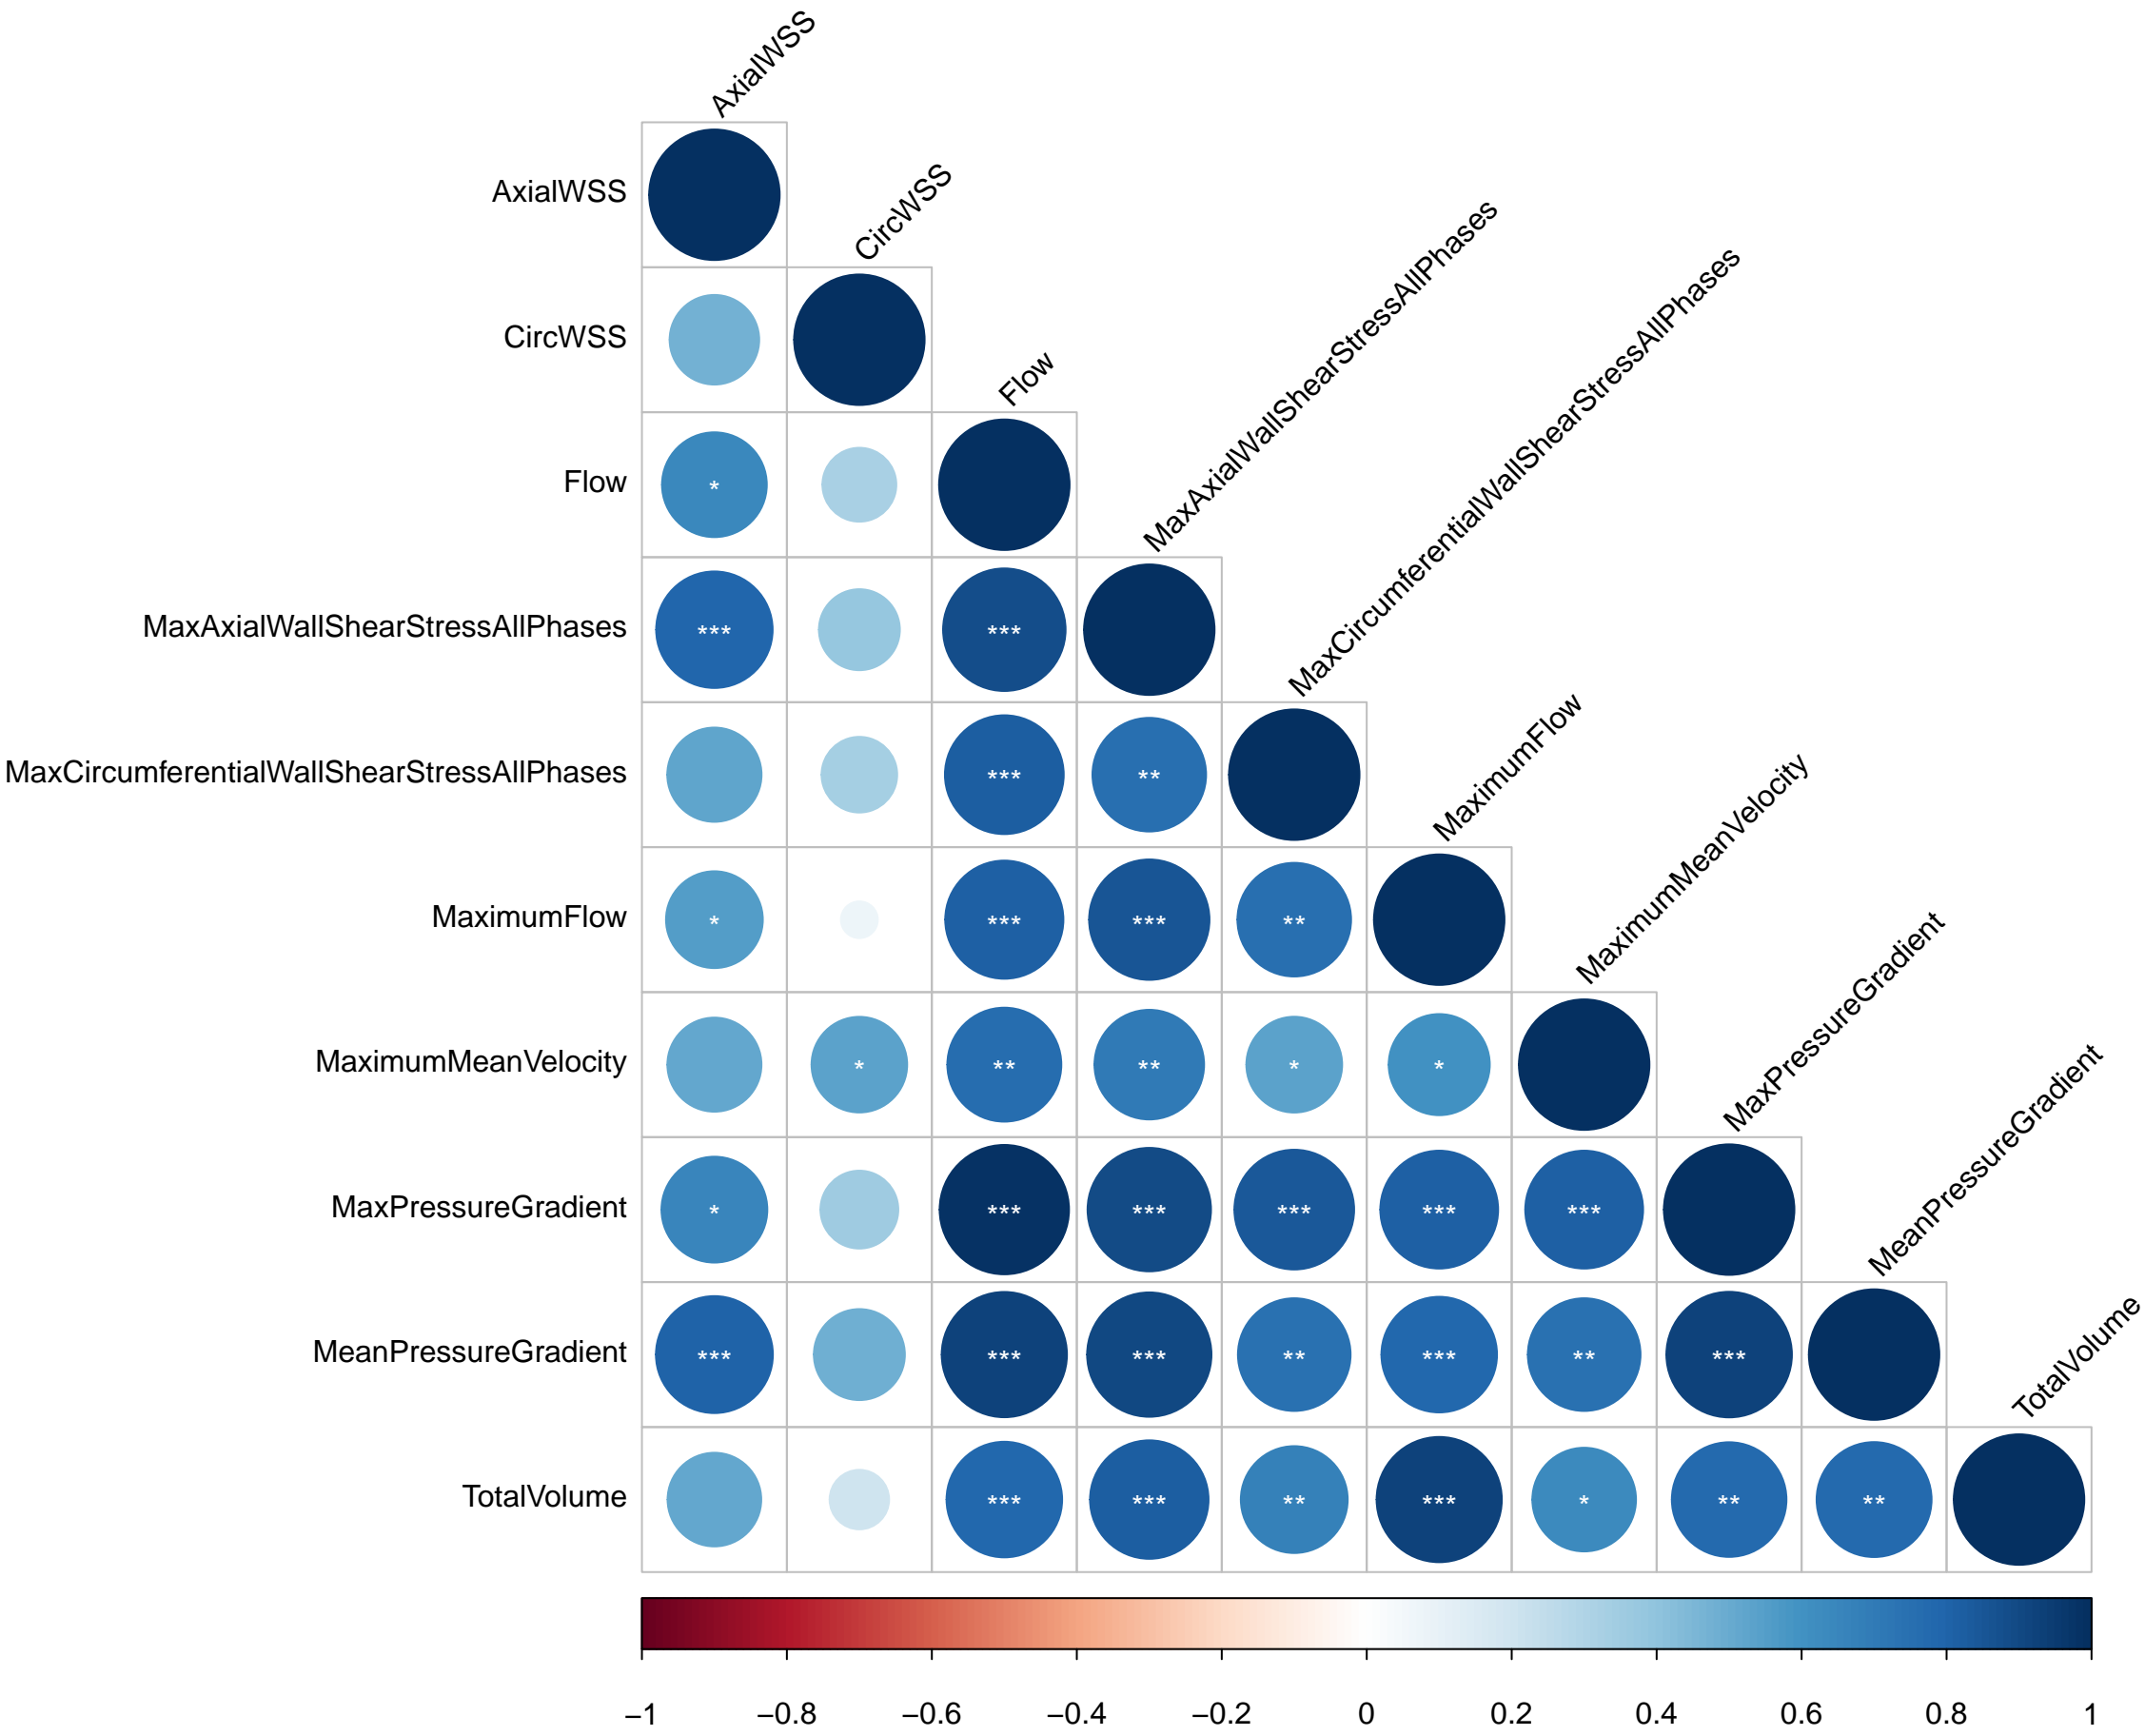

EF\_Phi1.5T

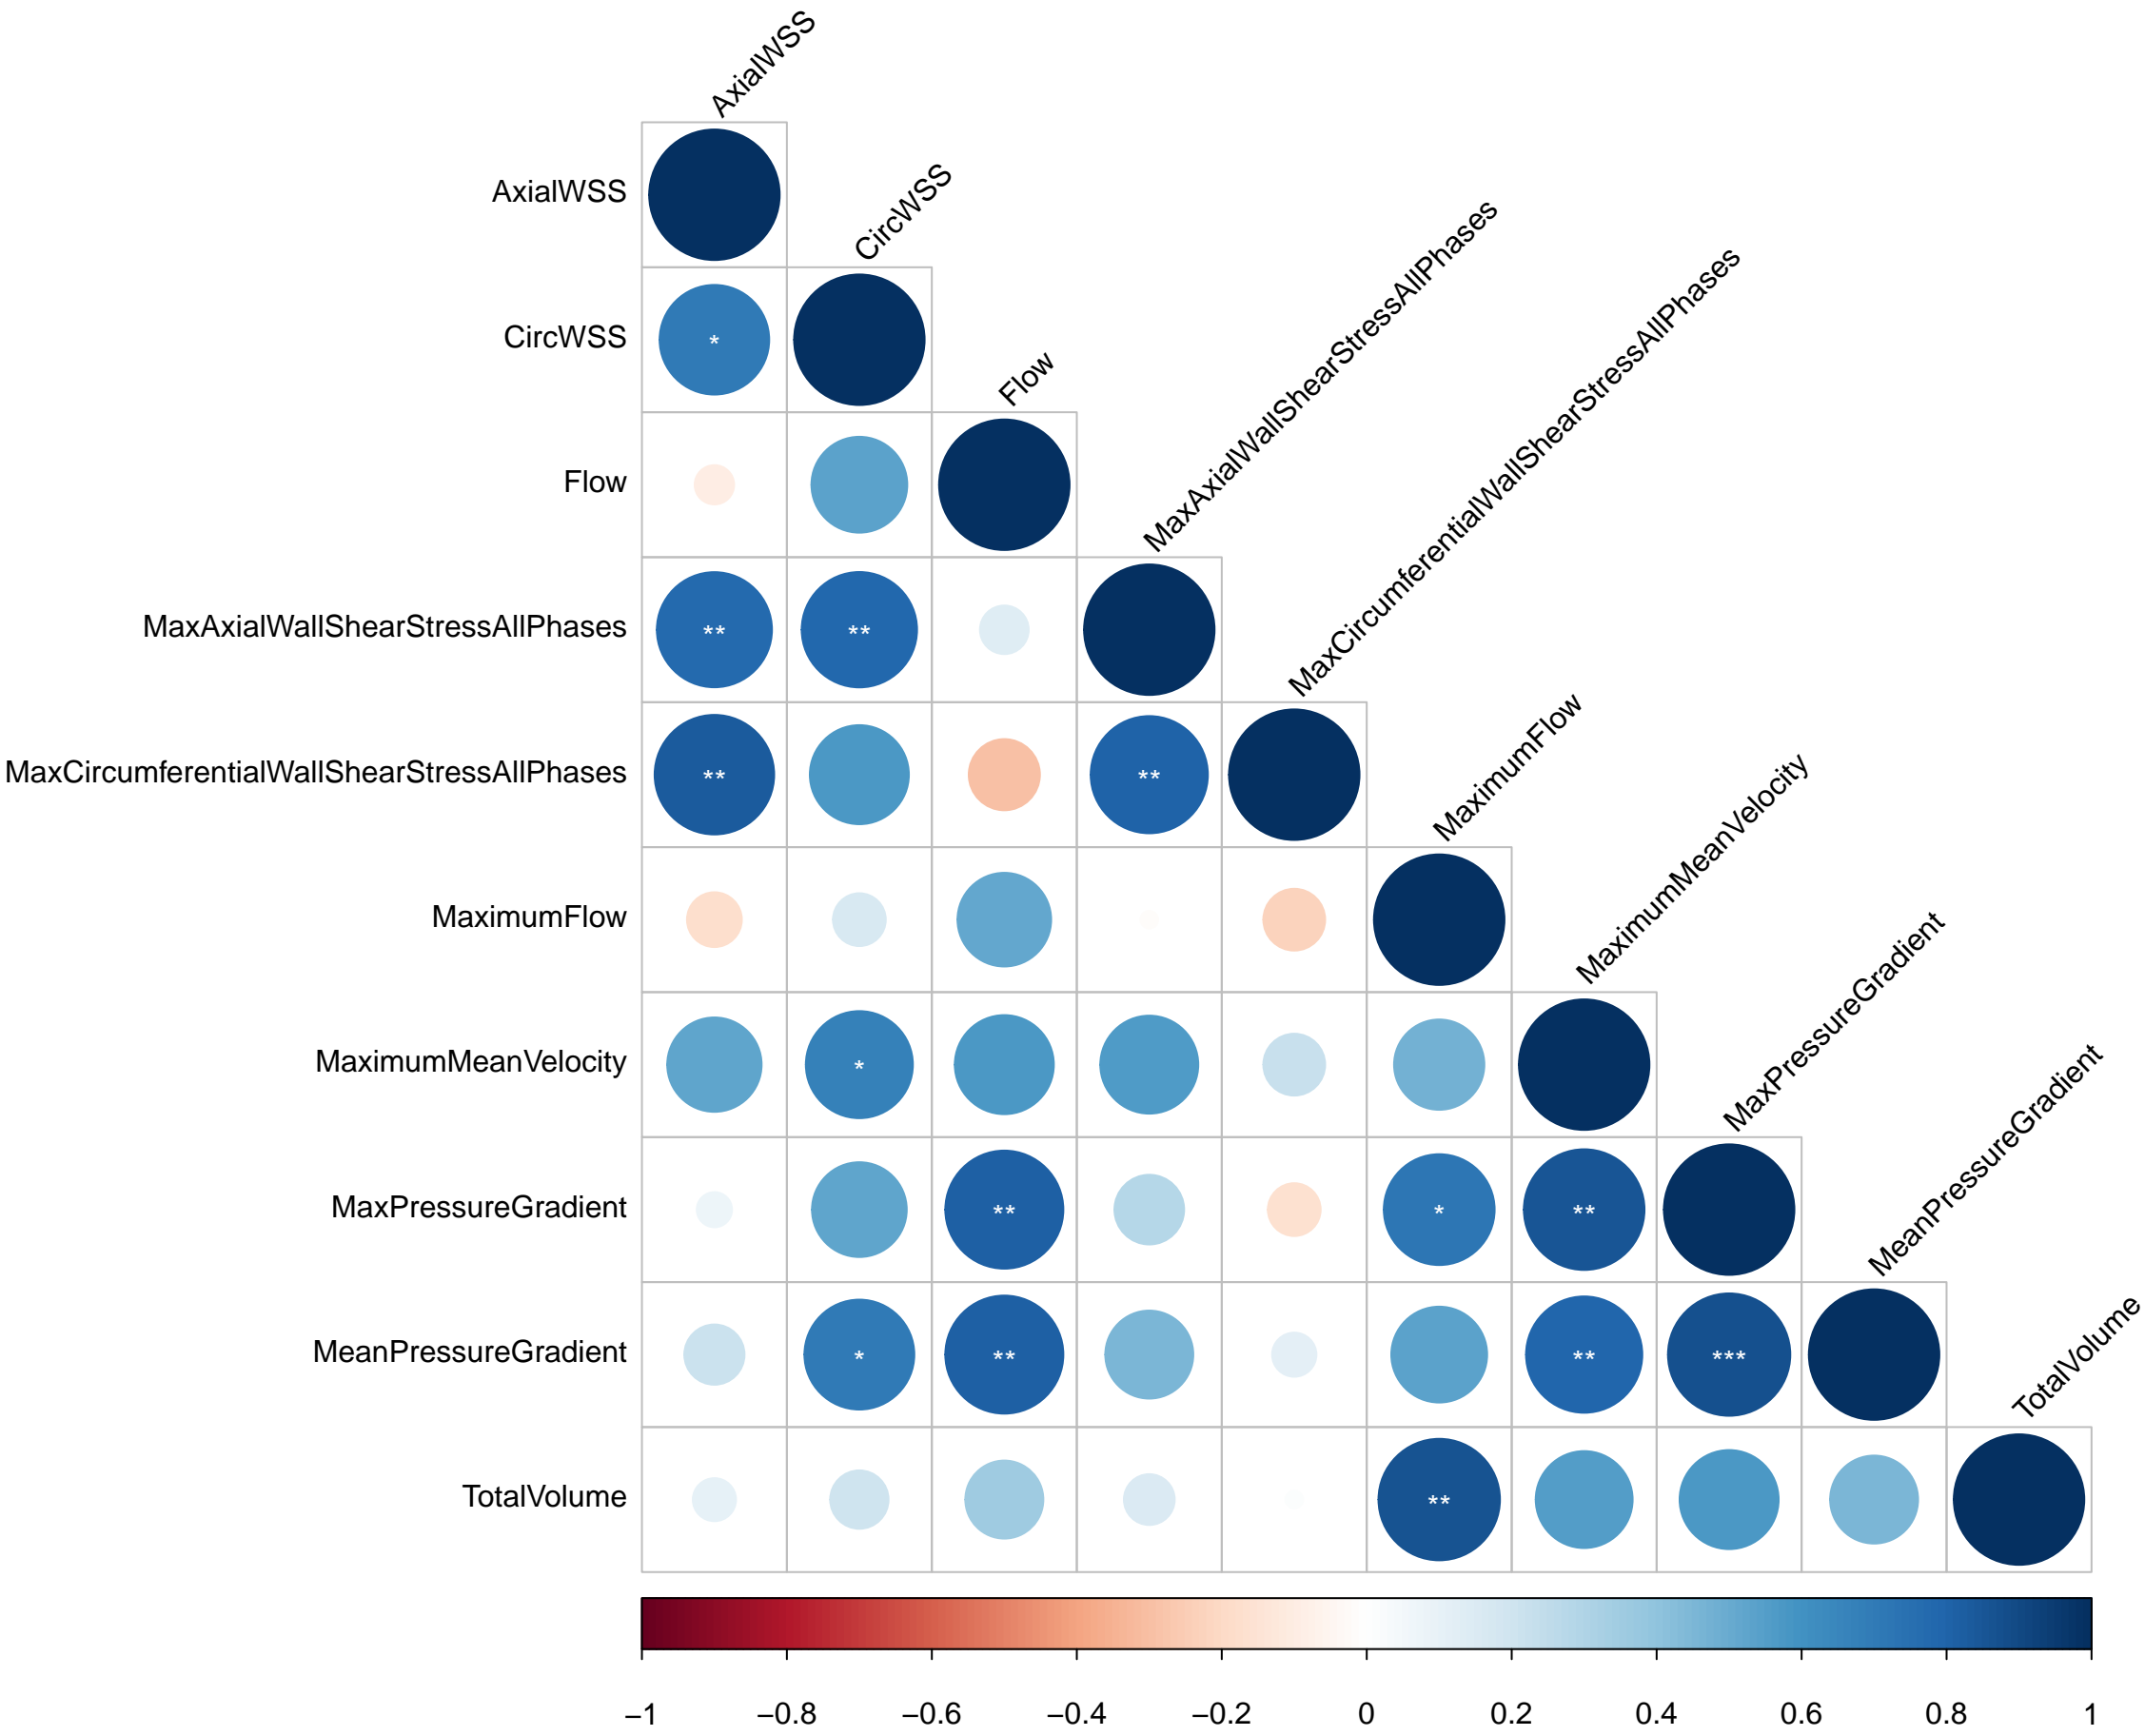

# EF\_Phi3T

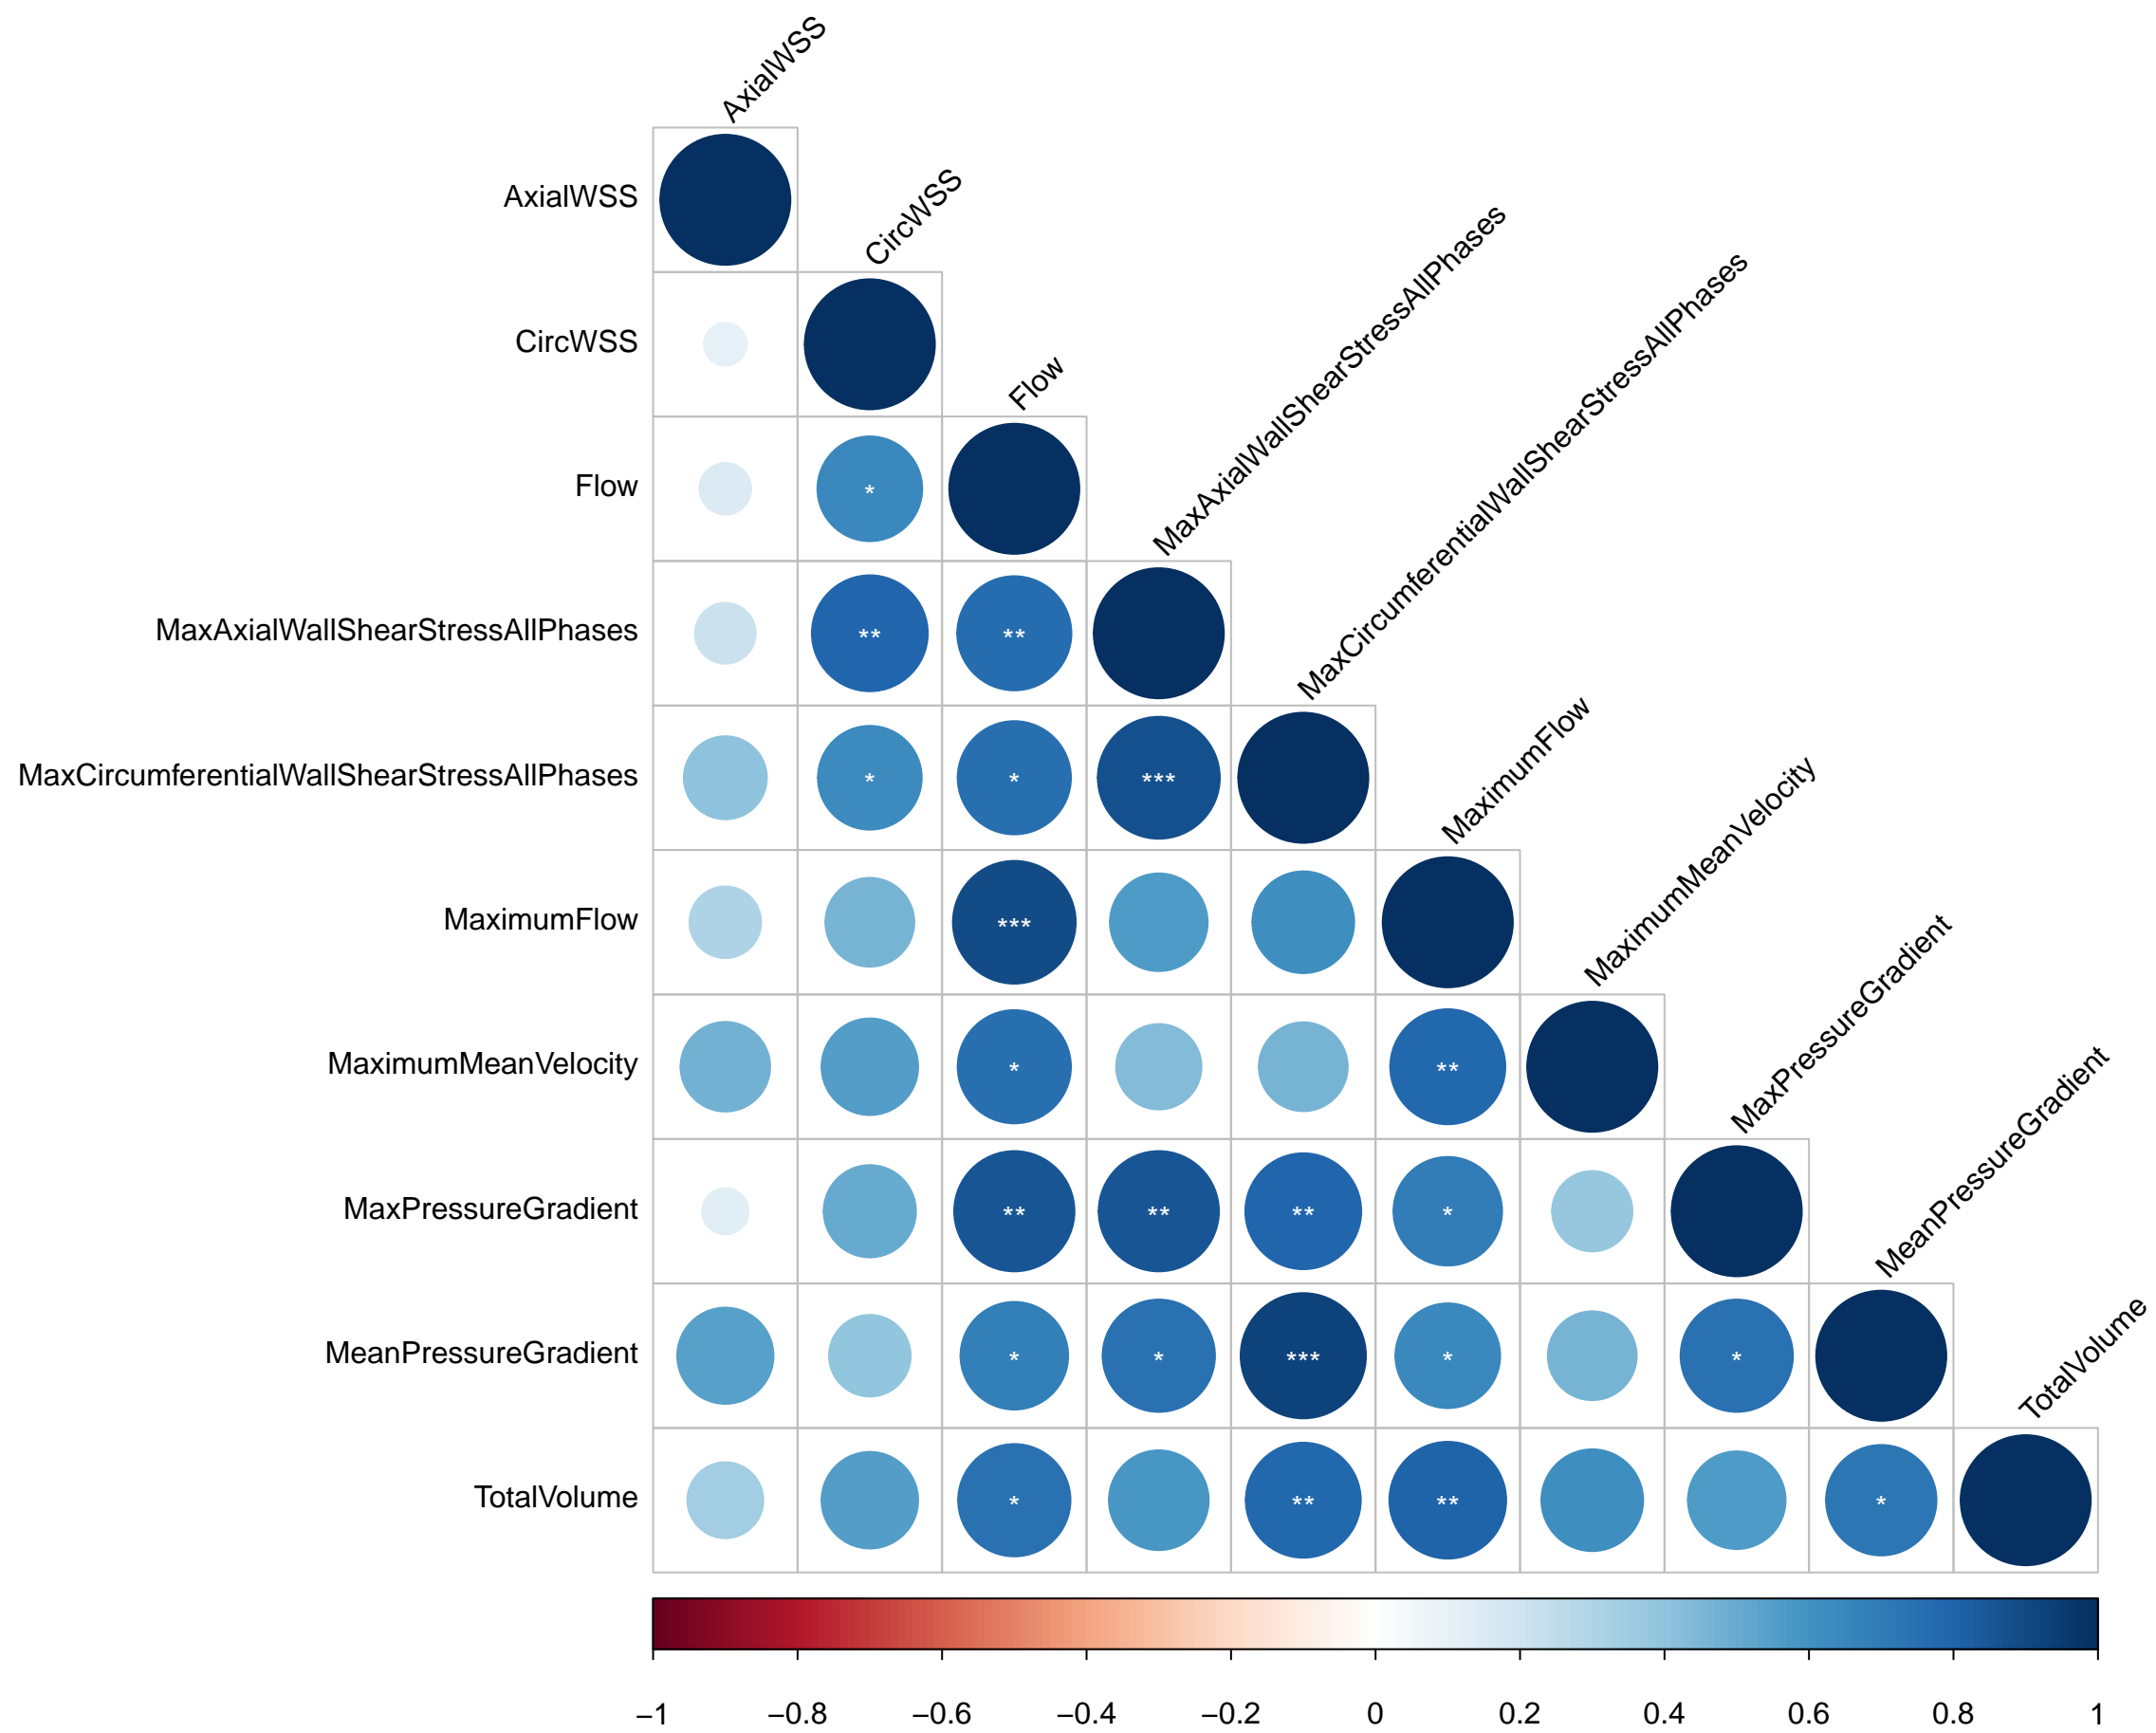



EF\_Siem3T

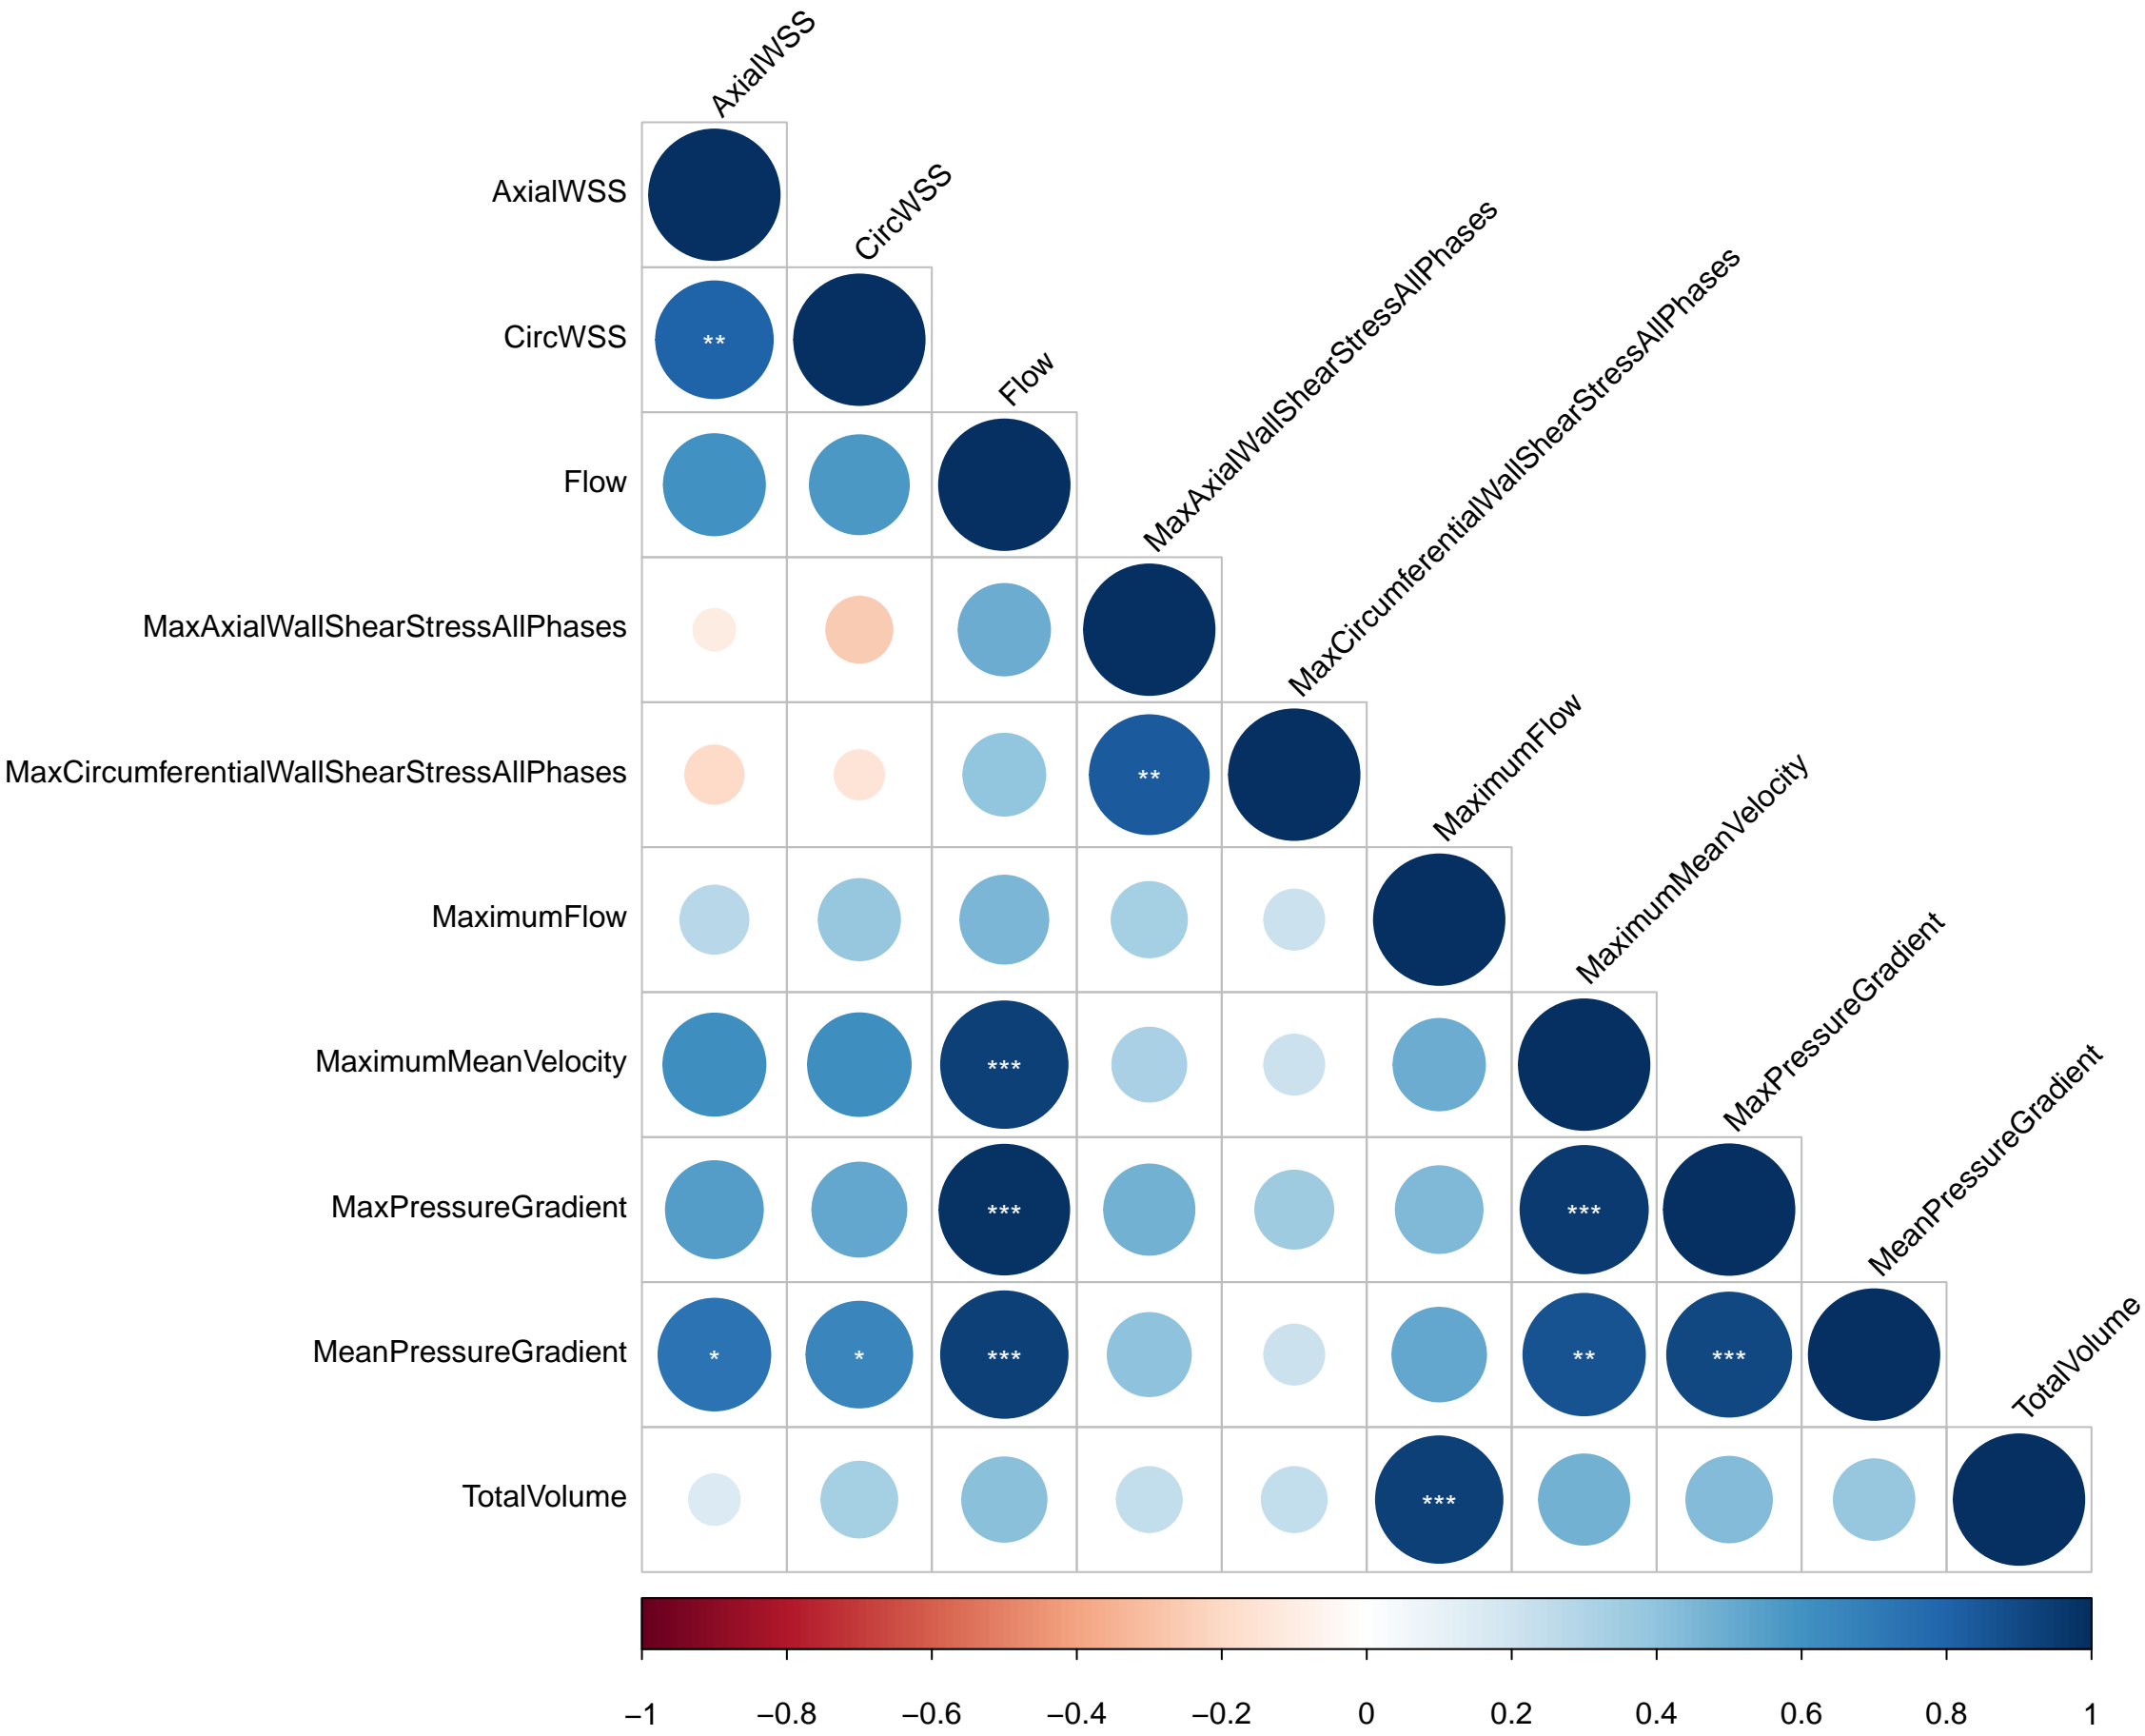

Supplement: s1 [file s1]
